# Supplementary material
Source: PubMed Central journal article supplement (PMC5030165)
Supplement: NIHMS803519-supplement-1.pdf [file NIHMS803519-supplement-1.pdf]

## Supplementary Information

### **Divergent biosynthesis yields a cytotoxic aminomalonate-containing precolibactin**

Zhong-Rui Li<sup>1,7</sup>, Jie Li<sup>2,7</sup>, Jin-Ping Gu<sup>3</sup>, Jennifer Y. H. Lai<sup>1</sup>, Brendan M. Duggan<sup>4</sup>, Wei-Peng Zhang<sup>1</sup>, Zhi-Long Li<sup>5</sup>, Yong-Xin Li<sup>1</sup>, Rong-Biao Tong<sup>5</sup>, Ying Xu<sup>6</sup>, Dong-Hai Lin<sup>3</sup>, Bradley S. Moore<sup>2,4\*</sup> & Pei-Yuan Qian<sup>1\*</sup>

<sup>1</sup>Division of Life Science and Environmental Science Programs, The Hong Kong University of Science and Technology, Clear Water Bay, Kowloon, Hong Kong, P. R. China. <sup>2</sup>Center for Marine Biotechnology and Biomedicine, Scripps Institution of Oceanography, University of California at San Diego, La Jolla, CA 92093, United States. <sup>3</sup>High-field NMR Research Center, College of Chemistry and Chemical Engineering, Xiamen University, Xiamen 361005, P. R. China. <sup>4</sup>Skaggs School of Pharmacy and Pharmaceutical Sciences, University of California at San Diego, La Jolla, CA 92093, United States. <sup>5</sup>Department of Chemistry, The Hong Kong University of Science and Technology, Clear Water Bay, Kowloon, Hong Kong, P. R. China. <sup>6</sup>Shenzhen Key Laboratory of Marine Bioresource & Ecoenvironmental Science, Shenzhen Engineering Laboratory for Marine Algal Biotechnology, College of Life Sciences and Oceanography, Shenzhen University, Shenzhen 518060, P. R. China. <sup>7</sup>These authors contributed equally to this work. \*e-mail: [bsmoore@ucsd.edu](mailto:bsmoore@ucsd.edu) or [boqianpy@ust.hk](mailto:boqianpy@ust.hk)

# Supplementary Results

## I. Supplementary Tables

**Supplementary Table 1.** Plasmids and strains used in this study.

|                                                                                            | Description                                                                                                                                                                                                                                                                                                                                          | Source     |
|--------------------------------------------------------------------------------------------|------------------------------------------------------------------------------------------------------------------------------------------------------------------------------------------------------------------------------------------------------------------------------------------------------------------------------------------------------|------------|
| <b>Strains</b>                                                                             |                                                                                                                                                                                                                                                                                                                                                      |            |
| <i>E. coli</i> CFT073                                                                      | Wild type <i>E. coli</i> strain harboring the colibactin ( <i>clb</i> ) gene cluster                                                                                                                                                                                                                                                                 | 1,2        |
| <i>Bacillus subtilis</i> 1779                                                              | Wild type <i>B. subtilis</i> strain harboring the amicoumacin ( <i>ami</i> ) gene cluster                                                                                                                                                                                                                                                            | 3          |
| <i>E. coli</i> Top10                                                                       | Host strain for routine cloning                                                                                                                                                                                                                                                                                                                      | Invitrogen |
| <i>E. coli</i> BL21 (DE3)/pLysE                                                            | Host strain for protein expression                                                                                                                                                                                                                                                                                                                   | Novagen    |
| <i>E. coli</i> DH10B                                                                       | Host for heterologous expression: $\Delta(\textit{araABC-leu})7697$ , $\textit{araD139}$ , $\textit{deoR}$ , $\textit{endA1}$ , $\textit{galK}$ , $\textit{galU}$ , $\Delta(\textit{lac})X74mcrA$ , $\Delta(\textit{mcrCB-hsdSMR-mrr})$ , $\textit{nupG}$ , $\textit{recA1}$ , $\textit{rpsL}(\text{Str}^r)$ , ( $\phi 80 \textit{lacZ}\Delta M15$ ) | Invitrogen |
| <i>E. coli</i> BW25113                                                                     | K12 derivative, $\Delta\textit{araBAD}$ , $\Delta\textit{rhaBAD}$                                                                                                                                                                                                                                                                                    | 4          |
| <i>E. coli</i> BW25113/pCAP01- <i>clb</i> /pIJ790                                          | <i>E. coli</i> BW25113 harboring pCAP01- <i>clb</i> and pIJ790, for the further genetic manipulation of pCAP01- <i>clb</i>                                                                                                                                                                                                                           | 2          |
| <b>Plasmids</b>                                                                            |                                                                                                                                                                                                                                                                                                                                                      |            |
| pET-28a(+)                                                                                 | Protein expression vector, production of N-terminally His-tagged fusion proteins, pBR322 ori, T7 promoter, $\textit{kan}^R$                                                                                                                                                                                                                          | Novagen    |
| pETDuet-1                                                                                  | Protein expression vector, pBR322 ori, T7 promoter, $\textit{amp}^R$                                                                                                                                                                                                                                                                                 | Novagen    |
| pIJ790                                                                                     | $\lambda$ -Red ( $\textit{gam}$ , $\textit{bet}$ , $\textit{exo}$ ), $\textit{cat}$ , $\textit{araC}$ , $\textit{rep101ts}$                                                                                                                                                                                                                          | 5          |
| pIJ773                                                                                     | Source of $\textit{apra}^R$                                                                                                                                                                                                                                                                                                                          | 5          |
| pDR111                                                                                     | Source of $\textit{amp}^R$                                                                                                                                                                                                                                                                                                                           | 6          |
| <b>Protein expression plasmids constructed</b>                                             |                                                                                                                                                                                                                                                                                                                                                      |            |
| pETDuet-1- <i>amiD</i>                                                                     | pETDuet-1, the thioesterase AmiD for <i>in vivo</i> complementation                                                                                                                                                                                                                                                                                  | This study |
| pETDuet-1- <i>clbQ</i>                                                                     | pETDuet-1, the thioesterase ClbQ for <i>in vivo</i> complementation                                                                                                                                                                                                                                                                                  | This study |
| pET-28a- <i>amiD</i>                                                                       | pET-28a(+), recombinant N-His <sub>6</sub> -AmiD for <i>in vitro</i> assay                                                                                                                                                                                                                                                                           | This study |
| pET-28a- <i>clbQ</i>                                                                       | pET-28a(+), recombinant N-His <sub>6</sub> -ClbQ for <i>in vitro</i> assay                                                                                                                                                                                                                                                                           | This study |
| <b>Plasmids for heterologous expression and genetic manipulation of <i>clb</i> pathway</b> |                                                                                                                                                                                                                                                                                                                                                      |            |
| pCAP01- <i>clb</i>                                                                         | pCAP01 derivative that carries a 70-kb genomic region containing the entire <i>clb</i> gene cluster                                                                                                                                                                                                                                                  | 2          |
| pCAP01- <i>clb</i> ( $\Delta\textit{clbP}$ )                                               | pCAP01- <i>clb</i> derivative ( $\Delta\textit{clbP}$ ): $\textit{apra}^R$                                                                                                                                                                                                                                                                           | 2          |
| pCAP01- <i>clb</i> ( $\Delta\textit{clbP}/\Delta\textit{clbQ}$ )                           | pCAP01- <i>clb</i> derivative ( $\Delta\textit{clbP}$ & $\Delta\textit{clbQ}$ ): $\textit{apra}^R$                                                                                                                                                                                                                                                   | This study |
| pCAP01- <i>clb</i>                                                                         | pCAP01- <i>clb</i> derivative ( $\Delta\textit{clbP}$ & $\Delta\textit{clbQ}$ ): $\textit{apra}^R$ ; ( $\Delta\textit{clbB}$ ):                                                                                                                                                                                                                      | This study |

|                                                        |                                                                  |                               |  |  |            |
|--------------------------------------------------------|------------------------------------------------------------------|-------------------------------|--|--|------------|
| ( $\Delta clbP/\Delta clbQ/\Delta clbB$ )              | $amp^R$                                                          |                               |  |  |            |
| pCAP01- <i>clb</i>                                     | pCAP01- <i>clb</i> derivative ( $\Delta clbP$ & $\Delta clbQ$ ): | $apra^R$ ; ( $\Delta clbC$ ): |  |  | This study |
| ( $\Delta clbP/\Delta clbQ/\Delta clbC$ )              | $amp^R$                                                          |                               |  |  |            |
| pCAP01- <i>clb</i>                                     | pCAP01- <i>clb</i> derivative ( $\Delta clbP$ & $\Delta clbQ$ ): | $apra^R$ ;                    |  |  | This study |
| ( $\Delta clbP/\Delta clbQ/\Delta clbD$<br><i>EF</i> ) | ( $\Delta clbDEF$ ):                                             | $amp^R$                       |  |  |            |
| pCAP01- <i>clb</i>                                     | pCAP01- <i>clb</i> derivative ( $\Delta clbP$ & $\Delta clbQ$ ): | $apra^R$ ; ( $\Delta clbG$ ): |  |  | This study |
| ( $\Delta clbP/\Delta clbQ/\Delta clbG$ )              | $amp^R$                                                          |                               |  |  |            |
| pCAP01- <i>clb</i>                                     | pCAP01- <i>clb</i> derivative ( $\Delta clbP$ & $\Delta clbQ$ ): | $apra^R$ ; ( $\Delta clbH$ ): |  |  | This study |
| ( $\Delta clbP/\Delta clbQ/\Delta clbH$ )              | $amp^R$                                                          |                               |  |  |            |
| pCAP01- <i>clb</i>                                     | pCAP01- <i>clb</i> derivative ( $\Delta clbP$ & $\Delta clbQ$ ): | $apra^R$ ; ( $\Delta clbI$ ): |  |  | This study |
| ( $\Delta clbP/\Delta clbQ/\Delta clbI$ )              | $amp^R$                                                          |                               |  |  |            |
| pCAP01- <i>clb</i>                                     | pCAP01- <i>clb</i> derivative ( $\Delta clbP$ & $\Delta clbQ$ ): | $apra^R$ ; ( $\Delta clbJ$ ): |  |  | This study |
| ( $\Delta clbP/\Delta clbQ/\Delta clbJ$ )              | $amp^R$                                                          |                               |  |  |            |
| pCAP01- <i>clb</i>                                     | pCAP01- <i>clb</i> derivative ( $\Delta clbP$ & $\Delta clbQ$ ): | $apra^R$ ; ( $\Delta clbK$ ): |  |  | This study |
| ( $\Delta clbP/\Delta clbQ/\Delta clbK$ )              | $amp^R$                                                          |                               |  |  |            |
| pCAP01- <i>clb</i>                                     | pCAP01- <i>clb</i> derivative ( $\Delta clbP$ & $\Delta clbQ$ ): | $apra^R$ ; ( $\Delta clbO$ ): |  |  | This study |
| ( $\Delta clbP/\Delta clbQ/\Delta clbO$ )              | $amp^R$                                                          |                               |  |  |            |

### ***E. coli* CFT073 mutants**

|                                                 |                                                                                                                                                                                                                                                             |  |  |  |            |
|-------------------------------------------------|-------------------------------------------------------------------------------------------------------------------------------------------------------------------------------------------------------------------------------------------------------------|--|--|--|------------|
| <i>E. coli</i> CFT073 $\Delta clbP$             | $\Delta clbP$ : $apra^R$ , deletion of <i>clbP</i> gene, the <i>clbP</i> gene was replaced by an apramycin resistance gene ( $apra^R$ ) by $\lambda$ Red-mediated recombination in <i>E. coli</i> CFT073                                                    |  |  |  | This study |
| <i>E. coli</i> CFT073 $\Delta clbP/\Delta clbQ$ | $\Delta clbP$ & $\Delta clbQ$ : $apra^R$ , deletion of <i>clbP</i> & $\Delta clbQ$ genes, the <i>clbP</i> & $\Delta clbQ$ genes were replaced by an apramycin resistance gene ( $apra^R$ ) by $\lambda$ Red-mediated recombination in <i>E. coli</i> CFT073 |  |  |  | This study |

### ***clb*<sup>+</sup> heterologous expression strains**

|                                                                                               |  |  |  |  |            |
|-----------------------------------------------------------------------------------------------|--|--|--|--|------------|
| <i>E. coli</i> DH10B harboring pCAP01- <i>clb</i>                                             |  |  |  |  | 2          |
| <i>E. coli</i> DH10B harboring pCAP01- <i>clb</i> ( $\Delta clbP$ )                           |  |  |  |  | 2          |
| <i>E. coli</i> DH10B harboring pCAP01- <i>clb</i> ( $\Delta clbP/\Delta clbQ$ )               |  |  |  |  | This study |
| <i>E. coli</i> DH10B harboring pCAP01- <i>clb</i> ( $\Delta clbP/\Delta clbQ/\Delta clbB$ )   |  |  |  |  | This study |
| <i>E. coli</i> DH10B harboring pCAP01- <i>clb</i> ( $\Delta clbP/\Delta clbQ/\Delta clbC$ )   |  |  |  |  | This study |
| <i>E. coli</i> DH10B harboring pCAP01- <i>clb</i> ( $\Delta clbP/\Delta clbQ/\Delta clbDEF$ ) |  |  |  |  | This study |
| <i>E. coli</i> DH10B harboring pCAP01- <i>clb</i>                                             |  |  |  |  | This study |

|                                                                                       |                |                                                                                                          |                                                                      |                    |            |
|---------------------------------------------------------------------------------------|----------------|----------------------------------------------------------------------------------------------------------|----------------------------------------------------------------------|--------------------|------------|
| DH10B/pCAP01- <i>clb</i><br>( $\Delta clbP/\Delta clbQ/\Delta clbG$ )                 | <i>E. coli</i> | DH10B                                                                                                    | harboring                                                            | pCAP01- <i>clb</i> | This study |
| DH10B/pCAP01- <i>clb</i><br>( $\Delta clbP/\Delta clbQ/\Delta clbH$ )                 | <i>E. coli</i> | DH10B                                                                                                    | harboring                                                            | pCAP01- <i>clb</i> | This study |
| DH10B/pCAP01- <i>clb</i><br>( $\Delta clbP/\Delta clbQ/\Delta clbI$ )                 | <i>E. coli</i> | DH10B                                                                                                    | harboring                                                            | pCAP01- <i>clb</i> | This study |
| DH10B/pCAP01- <i>clb</i><br>( $\Delta clbP/\Delta clbQ/\Delta clbJ$ )                 | <i>E. coli</i> | DH10B                                                                                                    | harboring                                                            | pCAP01- <i>clb</i> | This study |
| DH10B/pCAP01- <i>clb</i><br>( $\Delta clbP/\Delta clbQ/\Delta clbK$ )                 | <i>E. coli</i> | DH10B                                                                                                    | harboring                                                            | pCAP01- <i>clb</i> | This study |
| DH10B/pCAP01- <i>clb</i><br>( $\Delta clbP/\Delta clbQ/\Delta clbO$ )                 | <i>E. coli</i> | DH10B                                                                                                    | harboring                                                            | pCAP01- <i>clb</i> | This study |
| <b>Protein expression strains for <math>\Delta clbQ</math> complementation assay</b>  |                |                                                                                                          |                                                                      |                    |            |
| DH10B/pCAP01- <i>clb</i><br>( $\Delta clbP/\Delta clbQ$ )::pET<br>Duet-1- <i>amiD</i> | <i>E. coli</i> | Protein expression strain for <i>in vivo</i> $\Delta clbQ$ mutant complementation with thioesterase AmiD |                                                                      |                    | This study |
| DH10B/pCAP01- <i>clb</i><br>( $\Delta clbP/\Delta clbQ$ )::pET<br>Duet-1- <i>clbQ</i> | <i>E. coli</i> | Protein expression strain for <i>in vivo</i> $\Delta clbQ$ mutant complementation with thioesterase ClbQ |                                                                      |                    | This study |
| <b>Protein expression strains for production of recombinant proteins</b>              |                |                                                                                                          |                                                                      |                    |            |
| (DE3)/pLysE/pET-28<br>a- <i>amiD</i>                                                  | <i>E. coli</i> | BL21                                                                                                     | Protein expression strain for production of N-His <sub>6</sub> -AmiD |                    | This study |
| (DE3)/pLysE/pET-28<br>a- <i>clbQ</i>                                                  | <i>E. coli</i> | BL21                                                                                                     | Protein expression strain for production of N-His <sub>6</sub> -ClbQ |                    | This study |

---

**Supplementary Table 2.** Oligonucleotides used in this work. Restriction sites are marked in bold and homologous arms for recombination are underlined.

| Primer                            | Sequence                                                                                          | Description                                                                   |
|-----------------------------------|---------------------------------------------------------------------------------------------------|-------------------------------------------------------------------------------|
| <b>Primers for gene deletions</b> |                                                                                                   |                                                                               |
| <i>clbB</i> -knock out-F          | <u>GTGGACGCTGGTTGTAGGAGGGGAATCGG</u><br><u>GATTAACACTGTTTCAGTGATGGACTCC</u><br>TTATTTGATTTT       | Deletion of gene <i>clbB</i> from pCAP01- <i>clb</i> ( <i>clbP/clbQ</i> ).    |
| <i>clbB</i> -knock out-R          | TAAGCGCACGTA <sup>ACTCAATAGGATCACCC</sup><br><u>AGCACCGTACCGGTGCCGTGCTTGGTCTG</u><br>ACAGTTACCAAT |                                                                               |
| <i>clbC</i> -knock out-F          | <u>AACGGCATGGAAATCGCCATTATTGGTAT</u><br><u>GGCGGTCCGTTTCCCAGTCCGACTCC</u><br>TTATTTGATTTT         | Deletion of gene <i>clbC</i> from pCAP01- <i>clb</i> ( <i>clbP/clbQ</i> ).    |
| <i>clbC</i> -knock out-R          | <u>ACTCCTGCGGCTGTATCGGGATATAAAAC</u><br><u>GGTGAATGCGCCAGATCCAGCTTGGTCTG</u><br>ACAGTTACCAAT      |                                                                               |
| <i>clbDEF</i> -knock out-F        | <u>TGCAGGAGTAATGGGAACTGGCGTCGCTC</u><br><u>ATAACATGGCGCAATACGGCAGACTCC</u><br>TTATTTGATTTT        | Deletion of genes <i>clbD–F</i> from pCAP01- <i>clb</i> ( <i>clbP/clbQ</i> ). |
| <i>clbDEF</i> -knock out-R        | <u>TTTCTTTTTCCCGTTCAGCCGCAACCGTC</u><br><u>GCCATCCTGCTGTAATTCTGTTGGTCTGAC</u><br>AGTTACCAAT       |                                                                               |
| <i>clbG</i> -knock out-F          | <u>GTGGACGCTGGTTGTAGGAGGGGAATCGG</u><br><u>GATTAACACTGTTTCAGTGATGGACTCC</u><br>TTATTTGATTTT       | Deletion of gene <i>clbG</i> from pCAP01- <i>clb</i> ( <i>clbP/clbQ</i> ).    |
| <i>clbG</i> -knock out-R          | TAAGCGCACGTA <sup>ACTCAATAGGATCACCC</sup><br><u>AGCACCGTACCGGTGCCGTGCTTGGTCTG</u><br>ACAGTTACCAAT |                                                                               |
| <i>clbH</i> -knock out-F          | <u>ACGCGGAGAATCTGTGCGCACTGCAACTGC</u><br><u>CTTTTTGTTTCGAATTGATTAGACTCCT</u><br>TATTTGATTTT       | Deletion of gene <i>clbH</i> from pCAP01- <i>clb</i> ( <i>clbP/clbQ</i> ).    |
| <i>clbH</i> -knock out-R          | <u>TTGATGGTAGTGAAGCGCAGCAGGTCAAC</u><br><u>CAACGCCACGTGCTGACCGCATTGGTCTG</u><br>ACAGTTACCAAT      |                                                                               |
| <i>clbI</i> -knock out-F          | <u>ATAGCTATCATTGGGATGGCGGGGCGTTT</u><br><u>CCCTCAAGCCGATACGGTACAGACTCC</u><br>TTATTTGATTTT        | Deletion of gene <i>clbI</i> from pCAP01- <i>clb</i> ( <i>clbP/clbQ</i> ).    |
| <i>clbI</i> -knock out-R          | <u>GCTGTTATCGGAAAACGCCCGACAGTGGC</u><br><u>CATCGGCGGCGGTGATCCCACCTTGGTCTG</u><br>ACAGTTACCAAT     |                                                                               |
| <i>clbJ</i> -knock out-F          | <u>GATCATGTGGCCC GCGCCCTGTTAGCGCT</u><br><u>GGGCGTGCAGCATGGCGACCGGACTCC</u><br>TTATTTGATTTT       | Deletion of gene <i>clbJ</i> from pCAP01- <i>clb</i> ( <i>clbP/clbQ</i> ).    |
| <i>clbJ</i> -knock out-R          | <u>AAATAGCTCAGCAATAGGTACCGTAACCT</u><br><u>TAAAAATCTCCTCAATACGGCTTGGTCTG</u>                      |                                                                               |

|                           |                                                                                                     |                                                                                                                                                                                                              |
|---------------------------|-----------------------------------------------------------------------------------------------------|--------------------------------------------------------------------------------------------------------------------------------------------------------------------------------------------------------------|
|                           | ACAGTTACCAAT                                                                                        |                                                                                                                                                                                                              |
| <i>clbK</i> -knock out-F  | <u>GTACACGGCATT</u> <u>TTTACGACTGGGTGCGGT</u><br><u>CTATCTGCCAGTGGATCCGGTGACTCC</u><br>TTATTTGATTTT | Deletion of gene <i>clbK</i> from pCAP01- <i>clb</i> ( <i>clbP/clbQ</i> ).                                                                                                                                   |
| <i>clbK</i> -knock out-R  | CTGCCCCGATAATCGCCTCAAGTGCCTGCT<br><u>GAATACGCACCAATTCTATAGTTGGTCTG</u><br>ACAGTTACCAAT              |                                                                                                                                                                                                              |
| <i>clbO</i> -knock out-F  | <u>TGGCTCACTGGATATTGCCATTATTGGCAT</u><br><u>GAGCGGGCGTTTTTCCGGTGGACTCCT</u><br>TATTTGATTTT          | Deletion of gene <i>clbO</i> from pCAP01- <i>clb</i> ( <i>clbP/clbQ</i> ).                                                                                                                                   |
| <i>clbO</i> -knock out-R  | TGTGCGGCGCACATGCCGGTGCGAAAACC<br><u>CGGTGCAGAGCTTCAAGCTCATTGGTCTG</u><br>ACAGTTACCAAT               |                                                                                                                                                                                                              |
| <i>clbP</i> -knock out-F  | <u>ACACGTTAGCATTAAAACATTATATCATC</u><br><u>TCCTGTGCTGTATGCTGCTCTCTCACGTTA</u><br>AGGGATTTTGG        | Deletion of genes <i>clbP</i> & <i>clbQ</i> in the wild type colibactin producer <i>E. coli</i> CFT073. Deletion of genes <i>clbP</i> & <i>clbQ</i> from <i>E. coli</i> DH10B harboring pCAP01- <i>clb</i> . |
| <i>clbP</i> -knock out-R  | TCGTTTAATTTGATGATTTAATGTCAGAAC<br><u>GAAAGCTAACAGGATAATTCGCTCATGAG</u><br>CTCAGCCAATC               |                                                                                                                                                                                                              |
| <i>clbPQ</i> -knock out-F | <u>ACACGTTAGCATTAAAACATTATATCATC</u><br><u>TCCTGTGCTGTATGCTGCTCTCTCACGTTA</u><br>AGGGATTTTGG        | Deletion of genes <i>clbP</i> & <i>clbQ</i> in the wild type colibactin producer <i>E. coli</i> CFT073. Deletion of genes <i>clbP</i> & <i>clbQ</i> from <i>E. coli</i> DH10B harboring pCAP01- <i>clb</i> . |
| <i>clbPQ</i> -knock out-R | TCTACCCTACTATTTTCGAGTGATTCAATCGT<br><u>CTGGTTACATAACCTACCGCTCATGAGCT</u><br>CAGCCAATC               |                                                                                                                                                                                                              |

#### Colony PCRs for correct insert check

|                                  |                         |                                                                |
|----------------------------------|-------------------------|----------------------------------------------------------------|
| <i>clbB</i> -knock out check-F   | GCAACGCCGTGTCCACCACGA   | Colony PCR for correct insert check ( <i>clbB</i> knockout).   |
| <i>clbB</i> -knock out check-R   | TGCGGCGACCGAGTTGCTCTT   |                                                                |
| <i>clbC</i> -knock out check-F   | TGGCGCGTCACTATCCGCAAGTG | Colony PCR for correct insert check ( <i>clbC</i> knockout).   |
| <i>clbC</i> -knock out check-R   | TGCGGCGACCGAGTTGCTCTT   |                                                                |
| <i>clbDEF</i> -knock out check-F | ACGCACCACCCTTATCAGGCACG | Colony PCR for correct insert check ( <i>clbD-F</i> knockout). |
| <i>clbDEF</i> -knock out check-R | TGCGGCGACCGAGTTGCTCTT   |                                                                |
| <i>clbG</i> -knock out check-F   | GCAACGCCGTGTCCACCACGA   | Colony PCR for correct insert check ( <i>clbG</i> knockout).   |
| <i>clbG</i> -knock out check-R   | TGCGGCGACCGAGTTGCTCTT   |                                                                |
| <i>clbH</i> -knock out check-F   | GCACCTGGTGGCGCAGTGGA    | Colony PCR for correct insert check ( <i>clbH</i> knockout).   |

|                                    |                          |                                                                     |
|------------------------------------|--------------------------|---------------------------------------------------------------------|
| <i>clbH</i> -knock out<br>check-R  | TGCGGCGACCGAGTTGCTCTT    |                                                                     |
| <i>clbI</i> -knock out<br>check-F  | GCAGCAATACATCGGGCAGCAGTG | Colony PCR for correct<br>insert check ( <i>clbI</i> knockout).     |
| <i>clbI</i> -knock out<br>check-R  | TGCGGCGACCGAGTTGCTCTT    |                                                                     |
| <i>clbJ</i> -knock out<br>check-F  | GATCGAGTTGGCTGGGGAGTTGCA | Colony PCR for correct<br>insert check ( <i>clbJ</i> knockout).     |
| <i>clbJ</i> -knock out<br>check-R  | TGCGGCGACCGAGTTGCTCTT    |                                                                     |
| <i>clbK</i> -knock out<br>check-F  | CTCCTGCACGCCCTAGCCCAG    | Colony PCR for correct<br>insert check ( <i>clbK</i> knockout).     |
| <i>clbK</i> -knock out<br>check-R  | TGCGGCGACCGAGTTGCTCTT    |                                                                     |
| <i>clbO</i> -knock out<br>check-F  | TGCGGCATGCACCGGAAGACT    | Colony PCR for correct<br>insert check ( <i>clbO</i> knockout).     |
| <i>clbO</i> -knock out<br>check-R  | TGCGGCGACCGAGTTGCTCTT    |                                                                     |
| <i>clbP</i> -knock out<br>check-F  | CGCTGTTGGGCACTCTTTGGCAA  | Colony PCR for correct<br>insert check ( <i>clbP</i> knockout).     |
| <i>clbP</i> -knock out<br>check-R  | CGAGTGAGGTGGCAGGGGCAAT   |                                                                     |
| <i>clbPQ</i> -knock<br>out check-F | CGCTGTTGGGCACTCTTTGGCAA  | Colony PCR for correct<br>insert check ( <i>clbPQ</i><br>knockout). |
| <i>clbPQ</i> -knock<br>out check-R | CGAGTGAGGTGGCAGGGGCAAT   |                                                                     |

**Protein expression for *in vitro* enzymatic assay**

|                             |                                            |                                                                                                                         |
|-----------------------------|--------------------------------------------|-------------------------------------------------------------------------------------------------------------------------|
| <i>clbQ1</i> -BamHI-<br>F   | agtgagtGGATCCATGAGTAATATCAGTTTGT<br>ATTG   | Amplification of gene <i>clbQ</i><br>for protein expression,<br>inserted into the expression<br>vector pET28a, His tag. |
| <i>clbQ1</i> -XhoI-R        | agtgagtCTCGAGCTACCCTACTATTTTCGAGT<br>G     |                                                                                                                         |
| <i>amiD1</i> -HindIII<br>-F | agtgagtAAGCTTGCATGATCAAATTATTCTGT<br>CTGCC | Amplification of gene <i>amiD</i><br>for protein expression,<br>inserted into the expression<br>vector pET28a, His tag. |
| <i>amiD1</i> -XhoI-R        | agtgagtCTCGAGTCATACCACTCCTGTCTGA<br>TTC    |                                                                                                                         |

**Protein expression for *in vivo* complementation assay**

|                             |                                           |                                                                                                                   |
|-----------------------------|-------------------------------------------|-------------------------------------------------------------------------------------------------------------------|
| <i>amiD2</i> -HindIII<br>-F | agtgagtAAGCTTATGATCAAATTATTCTGTCT<br>GCC  | Amplification of gene <i>amiD</i><br>for protein expression,<br>inserted into the expression<br>vector pETDuet-1. |
| <i>amiD2</i> -NotI-R        | agtgagtGCGGCCGCTCATACCACTCCTGTCT<br>GATTC |                                                                                                                   |
| <i>clbQ2</i> -BamHI-<br>F   | agtgagtGGATCCGATGAGTAATATCAGTTT<br>GTATTG | Amplification of gene <i>clbQ</i><br>for protein expression,<br>inserted into the expression<br>vector pETDuet-1. |
| <i>clbQ2</i> -HindIII-<br>R | agtgagtAAGCTTCTACCCTACTATTTTCGAGT<br>G    |                                                                                                                   |

---

**Supplementary Table 3.** Accession numbers and descriptions of TEs used for alignment analysis.

| <b>Thioesterase</b>                             | <b>Accession number</b> |
|-------------------------------------------------|-------------------------|
| Bacillorin_TEI_NRPS                             | WP_007410142            |
| Chondramid_TEI_PKS/NRPS                         | Q0VZ70                  |
| Cryptophycin_TEI_PKS/NRPS                       | ABM21572                |
| Didemnin_TEI_PKS/NRPS                           | WP_014748210            |
| Fengycin_TEI_NRPS                               | AAB00093                |
| Fusaricidin_TEI_NRPS                            | ABQ96384                |
| Hectochlorin_TEI_PKS/NRPS                       | AAV42398                |
| Iturin_TEI_NRPS                                 | ABY89500                |
| Lasalocid_TEI_PKS                               | BAG85032                |
| Myxothiazol_TEI_PKS/NRPS                        | AAF19815                |
| Soraphen_TEI_PKS                                | AAA79984                |
| Spinosyn_TEI_PKS                                | AAG23262                |
| Surfactin_TEI_NRPS                              | 1JMK_C                  |
| Tubulysin_TEI_PKS/NRPS                          | CAF05651                |
| Tyrocidine_TEI_NRPS                             | O30409                  |
| Zwittermicin_TEI_PKS/NRPS                       | ACM79812                |
| Erythromycin_TEII_PKS                           | AAA21345                |
| FR-008/candicidin_TEII_PKS                      | AAQ82559                |
| Natamycin_TEII_PKS                              | ADX66462                |
| Bacitracin_TEII_NRPS                            | WP_020452080            |
| Borrelidin_TEII_PKS                             | WP_019330222            |
| Kendomycin_TEII_PKS                             | CAQ52621                |
| Gramicidin <i>B. pseudomycooides</i> _TEII_NRPS | WP_006096422            |
| Megalomicin_TEII_PKS                            | AAG13923                |
| Gramicidin <i>A. migulans</i> _TEII_NRPS        | P14686                  |
| Pikromycin_TEII_PKS                             | AAC69333                |
| Rifamycin_TEII_PKS                              | AAG52991                |
| Yersiniabactin_TEII_PKS/NRPS                    | WP_001551291            |
| Zwittermicin_TEII_PKS/NRPS                      | ACM79811                |
| Tylosin_TEII_PKS                                | KDS84464                |
| Amicoumacin_TEII_PKS/NRPS                       | WP_019257684            |
| ScoT <i>S. coelicolor</i> A3(2)_TEII_PKS        | AAF43096                |
| Didemnin_TEII_PKS/NRPS                          | WP_014748194            |
| Colibactin_TEII_PKS/NRPS                        | AE014075                |



## II. Supplementary Figures

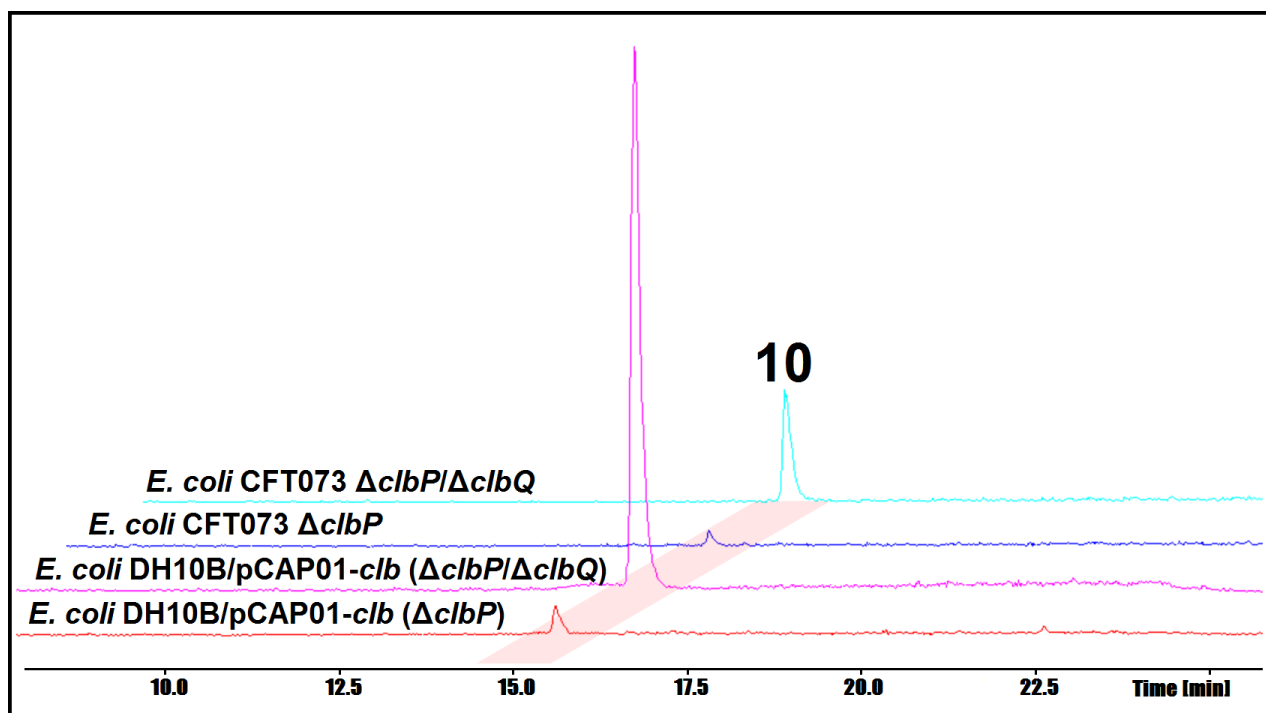

**Supplementary Fig. 1.** The comparison of UPLC-MS extracted ion chromatogram traces of EtOAc extracts obtained from *E. coli* CFT073  $\Delta clbP$  and *E. coli* CFT073  $\Delta clbP/\Delta clbQ$ ; *E. coli* DH10B/pCAP01-*clb* ( $\Delta clbP$ ) and *E. coli* DH10B/pCAP01-*clb* ( $\Delta clbP/\Delta clbQ$ ), respectively. EIC+ =  $887.38 \pm 0.01$ , corresponding to compound **10** (designated as precolibactin-886 in the present study).



Bacillorin\_TEI\_NRPS  
 Chondramid\_TEI\_PKS/NRPS  
 Cryptophycin\_TEI\_PKS/NRPS  
 Didemnin\_TEI\_PKS/NRPS  
 Fengycin\_TEI\_NRPS  
 Fusaricidin\_TEI\_NRPS  
 Hectochlorin\_TEI\_PKS/NRPS  
 Iturin\_TEI\_NRPS  
 Lasalocid\_TEI\_PKS  
 Myxothiazol\_TEI\_PKS/NRPS  
 Soraphen\_TEI\_PKS  
 Spinosyn\_TEI\_PKS  
 Surfactin\_TEI\_NRPS  
 Tubulysin\_TEI\_PKS/NRPS  
 Tyrocidine\_TEI\_NRPS  
 Zwittermicin\_TEI\_PKS/NRPS

```

152 154 156 158 160 162 164 166 168 170 172 174 176 178 180 182 184 186 188 190 192 194 196 198 200 202 204 206 208 210 212 214 216 218 220 222 224 226 228 230 232 234 236 238 240 242 244
E T E E I I H R N L D I I P - - - - - D Y Y R E L L T I P S - - - - - I K D K I R S Y L T Y H N K L I N S G A V N A N I H H F L C G E L T - - - - -
D E A A A W Q R T L D A F I A - - - - - A R W M P K D A D V E Q L Q H L C A M N Q V V R V R D H V P T D T H Q G K L L V F S A A F A M R - - - - -
T S P A R L R L V A D R A V A - - - - - A G A L P A R D A E G T V R - R L L A L T Q I S G R L A R E A T L P A Y G G P L A M L R A A E A L T P A L E - - - - -
D T E N D - - - - - D S A A Y L P - E A V R E T V M Q K K R C Y Q E Y W A Q L I N E G R I K S N I H F I E A G I Q T E T S G - - - - -
Q L E E I V E V V L D S I G - - - - - D Q Y K S F L A D P A D R R E R V K D K M L I Y S I Y R N E L I N A G E V Q S N I H A L V A E D D S I G P V T - - - - -
S L E E R L N Y V N E Q F K - - - - - V N L F P P G T G V K I R G I L R V G K A N Q Q E A Y Y V P R D I N Y P T Q I T L F R A S E E A P M E V A A S E D I
E I E I V H L N M D I I P - - - - - D Y R E I L T I P S - - - - - I K D K I R G Y L A Y H N E V I N S G A V N A N I H H L C G D V D T - - - - -
L G S Q E W L P V I N E M L L - - - - - A R G A A A G A E D S D A G D A V W T A R A K Y F S L D F A I A P R D V R T L L L R P A E P L A G - - - - -
E V E E I I H L N L D I I P - - - - - V Y R E L L T I P S - - - - - I K E K I R G Y L A Y H N Q L I N S G T I N A N I H H L L C D D M T - - - - -
- - - - - A V E A G L K I F H - - - - - V E Q L Q T W G - A S D A G - L T A E A W Y Y E H I G L E T W K P R Q L A A P T L H V R A T E P M K Q F V G - - - - -
I T P R F S V A M A H R T Y - - - - - E K L A T F T D M Q D V G - I T A M G G Y F R M F - - T E W T P T I G A P T L F V R T E D C V A D P E G - - - - -
T V E S D V E A L M N V N R - - - - - D N E A L N S E A V K H G L K Q K T H A F Y S Y Y V N L I S T G V Q K A D I D L L T S G A D F D - - - - -
R K G G L V Q E L L D H A A M - - - - - A R V V P E D S R L L L L R - E P G I A P M L R L T R A H Q R A M L S Y R - P R G L R Q R I V L F R T S E - - - - -
E T E N D I A Q L F A E I G E N T E M F N M T Q E D F Q Y A A N E F V K Q S F V R K T V S V M F H N L V N T G M T T A I I H L I Q S E L A D E A D E - - - - -
S E E Q L I E S L L K K F K L N - - - - - E N S C Q Q N F E D P M M N K L V M I A N R Y A Y L K Y N C K Q I K A D I F L F N A S I N D I H P - - - - -
  
```

Erythromycin\_TEI\_PKS  
 FR-008/candicidin\_TEI\_PKS  
 Natamycin\_TEI\_PKS  
 Bacitracin\_TEI\_NRPS  
 Borrelidin\_TEI\_PKS  
 Kendomycin\_TEI\_PKS  
 Gramicidin B\_pseudomycoides\_TEI\_NRPS  
 Megalomicin\_TEI\_PKS  
 Gramicidin A\_migulans\_TEI\_NRPS  
 Pikromycin\_TEI\_PKS  
 Rifamycin\_TEI\_PKS  
 Yersiniabactin\_TEI\_PKS/NRPS  
 Zwittermicin\_TEI\_PKS/NRPS  
 Tylosin\_TEI\_PKS  
 Amicoumacin\_TEI\_PKS/NRPS  
 ScoT S. coelicolor A3(2)\_TEI\_PKS  
 Didemnin\_TEI\_PKS/NRPS  
 Colibactin\_TEI\_PKS/NRPS

```

110 112 114 116 118 120 122 124 126 128 130 132 134 136 138 140 142 144 146 148 150 152 154 156 158 160 162 164 166 168 170 172 174 176 178 180 182 184 186
A P R V H E R - R T D - L P G D D G L V D E L R - R L G - T S E A A L A D E A L L A M S L P V L R A R Y R V L R S Y A W - A D G - - P P L R A G I T A L C
G P S T T R A - E R V H T R D D G I V A E M K - R N G T A A G V L G D E E I L R M A L P A L R G D Y R A I E T Y T C - P P D - - R R L A C G L T V L T
A P S R Y R T - E S V H R R D D G I V A E L K - L L S G T D A A L L G D E E L L R M I L P A I R S D Y T A V E T Y R C - D P G - - A A I K A P I T A L T
A P N R I R K T E K L H T L P N P I F K K K I V - E L G G T P E E L I N H E E L F E L F I P I L K S D F K M V E N Y I Y Q E R N - S K I D C D I T V L N
A P S R Q R T G G T V H L L S D E E L V A E I R - T L D G T A E Q V F H D E E L V R M A L P A I R G D Y R A A E T Y R Y - R P G - - P K L R C P I H A L T
A P S C L R A - D T V H L R D D G I V A E I R - A V G G T D A R I D D P E L S F A L P A R A R A V E T Y R A - V E G - - A A V A C P V T V L T
S P Q V S K R E T P T Y N L P K R E F I E L L R - K M N G T P E E V I G N H E I M D L F L P I L R A D F E L V D T Y Q E K S S - - M L S C P I T V F G
A P R V H E R - R T D - L P G D D G L V D E Q M R - R L G - V S E A A L A D Q E L D M S L P V L R A D H R V L R S Y A W - Q A G - - P P L R A G I T A L C
A P Q I P C A K Q D Y H L L P D E Q F I Q E L R - S I N G T P E I V I Q D A E M M S I L L R L R A D F S V C G S Y Q Y K N D E - - P F E C P I T A F G
A P S L A P D - R L V H Q L D D R A F L A E I R - R I S G T D R E F Q D D E L R L V L P A L R S D Y K A E T Y L H - R P S - - A K I T C P V M A I A
A P S R Y R D - D D V R G A S D R F V A E L R - K L G G S D A A M A D P E L L A M V L P A I R S D Y R A V E T Y R H - E P G - - R R V D C P V T V T F
A P H L H S E - R Q L S H R D D A D F I A E L I - D I G G C S P E L R E N Q E M S L F L L R A D F Y A T E S H Y D S P D V C P P L R T P A L L L C
P P E I R R K - - - T N H L D D K D F I D Y I K - S L G L P D E V L Q H E L N Y I L P V I R S D F R A I E N Y I N D D T T - - L L K A P L Y I S
A P T A D R T - E T A H L L G D R E L L A E I R - R Q G T D P G V F A D E E V L R M V L P A I R G D Y A A V G R Y R H - V P G - - P R P G C P L T V T F
P P P H I P E K K V L Q L S D S A L K Q A I I - E M G G V P E E F S K N E Q V L D F F L P I L R A D F E L L E T Y R N - T A V - - A P L S C D I S V F Y
A P T P Q G S - D S R L D T D E K V I A M I R - R E G G T V G K V F D D P V M E M V M P L R A D Y R A V A G Y T W - Q P G - - P P L A V P V T V L V
A P G S S T L G D L L G D D A G F A D A L A R Y D G I P A A L L A D R E I M A V F L P L R A D F R M V A E Y R P - D P A A C P R L C P I L A L G
P P D R A S H E V I L H T L P D A F M E E I V - K L G G T P V D V F R N K E I M T I F T I I K N D Y R L Y E Q V F Q A K A - - R T L T C P I V L F H
  
```

Bacillorin\_TEI\_NRPS  
 Chondramid\_TEI\_PKS/NRPS  
 Cryptophycin\_TEI\_PKS/NRPS  
 Didemnin\_TEI\_PKS/NRPS  
 Fengycin\_TEI\_NRPS  
 Fusaricidin\_TEI\_NRPS  
 Hectochlorin\_TEI\_PKS/NRPS  
 Iturin\_TEI\_NRPS  
 Lasalocid\_TEI\_PKS  
 Myxothiazol\_TEI\_PKS/NRPS  
 Soraphen\_TEI\_PKS  
 Spinosyn\_TEI\_PKS  
 Surfactin\_TEI\_NRPS  
 Tubulysin\_TEI\_PKS/NRPS  
 Tyrocidine\_TEI\_NRPS  
 Zwittermicin\_TEI\_PKS/NRPS

```

246 248 250 252 254 256 258 260 262 264 266 268 270 272 274 276 278 280 282 284 286 288 290 292 294 296 298 300 302 304 306
- - - - - D R G W K Q - - - - - S T A Q H Y L E Y K L K G D H V T I F D P H N I E E N T D T I R S I I K R I - - - - -
- - - - - N G R Q V S T E G W Q A F C A N P V T T H E V P G D H M T M L R E P D V R G L A I K L R R E I D E - - - - -
- - - - - Y S H I F Q E P T W G N Q F S D G E V E I H I V P G N H V S M L S E P H V K V L A Q - - - - -
- - - - - D L A R R D P A C G W G R H A T G R L A T A T V P G R H D T M M T A P H V D R L A T V I D H - - - - -
- - - - - A M V L K W Q D - - - - - A A E E G Y A E Y T G Y G A H K D M L E G E F A E K N A N I L N I L D K I N S D Q K
- - - - - S S D K L L W Q Q - - - - - A T L G Q Y E E Y G V I G T H D V L L D S G Y V E N A K V L R Q I L G K V - - - - -
H K I L Y D S R K N D P V W G E F S A G E V E L H S V P G D H L T I M A E P N V G V L A E K L R A C L E K A - - - - -
- - - - - D R G W T Q - - - - - S T A Q H Y L E Y K L K G D H V T I F E P H N I E E N A E A I R S I I K R I E - - - - -
- - - - - S A A D A G W R A E W R P G T T V V E V P G N H S M L D S A H A Q A C A R A - - - - -
- - - - - E R G W T H - - - - - S T A H N Y K E Y E L K G D H V T I F D P Q Y I E E N M S T I R S I - - - - -
- - - - - S E G - - - - - A P A E W R A S W K L P H V A I D A P G D H A T V V D H F L A Q A V D D W L - - - - -
- - - - - R P W - - - - - T D S W R P G W T L A D A T V Q V P G D H F S M M D E - - - - -
- - - - - I P E W L A S W E E A T T G A Y R M K R G F G T H A E M L Q G E T L D R N A G I L L E F L N T Q T - - - - -
- - - - - Q A W S F A R D L G W G A L S A S G V D V R E A P G D H M T L L R P P H V E R V A E Q L R A L L - - - - -
- - - - - A P V A A K W N E S A W A N A T Q R L L T Y S G H G I H S R M L A G D Y A S Q N A S I L Q N I L Q E L - - - - -
- - - - - L V D Y N R W N E Y T S G E V Y A L Q V P G S H L S M L E K P H I H E L V K S I K K S - - - - -
  
```

Erythromycin\_TEI\_PKS  
 FR-008/candicidin\_TEI\_PKS  
 Natamycin\_TEI\_PKS  
 Bacitracin\_TEI\_NRPS  
 Borrelidin\_TEI\_PKS  
 Kendomycin\_TEI\_PKS  
 Gramicidin B\_pseudomycoides\_TEI\_NRPS  
 Megalomicin\_TEI\_PKS  
 Gramicidin A\_migulans\_TEI\_NRPS  
 Pikromycin\_TEI\_PKS  
 Rifamycin\_TEI\_PKS  
 Yersiniabactin\_TEI\_PKS/NRPS  
 Zwittermicin\_TEI\_PKS/NRPS  
 Tylosin\_TEI\_PKS  
 Amicoumacin\_TEI\_PKS/NRPS  
 ScoT S. coelicolor A3(2)\_TEI\_PKS  
 Didemnin\_TEI\_PKS/NRPS  
 Colibactin\_TEI\_PKS/NRPS

```

188 190 192 194 196 198 200 202 204 206 208 210 212 214 216 218 220 222 224 226 228 230 232 234
G D A D P L T A T G D A E R W L Q H S V I P G R T R T F P G - G H F Y L G E Q V T E V A G A - - -
G E D D P L T T V E E A E R W R D H T T G P F R L R V F T G - G H F L T Q H L D A V N - - -
G D N D P K T T L E E A A D W R A H T T G A F D L Q V Y P G - G H F L L G S Q A P A V L A L - - -
G K E D A M S K E - D V S D W K H H T S G H F T A Y Y F E G - N H F L H H H V E K I T E I - - -
G D D D M V T P V E A R A W S E H T D G P F T L D T F A C - G H F Y L L E H R D A I L - - -
G D H D P R V S V A E A E G W A V H T T G G F S M R V F P G - G H F Y L A E R A R E V A E A - - -
G I D D S I K T E E L K H W K E L T I N N F N M H L F P G - D H F F I Y E N - - -
G D T D P L T T V E D A Q R W L P Y S V V P G R T R T F P G - G H F Y L A D H V G E V A E - - -
G K N D N G V T Q S L E A W R E Q T K R E F S V C M Y P G - D H F F L Y E - - -
G D R D P K A P L N E V A E W R R H T S G P F C L R A Y S G - G H F Y L N D Q W H E I - - -
G D H D P R V S V G E A R A W E E H T T G P A D L R V L P G - G H F L V D Q A A P M I A T - - -
G S H D R E A S W Q V D A W R Q W L S H V T G P V I D G - D H E Y P I Q A R S F F T Q I V R
G T I D S N Y T V K G A K K W V E W G N E V H F L T V N G G - - H M F L L H Q A D I V - - -
G D A D N V T L P E A E A W R E L T T G A F A L R V F P G - G H F Y L N D Q R E A V C R T - - -
G K R D L P S V L F D L S D N N Q Y D Q T C R F Y E F E G - D H F F I N Q K T E E V T A K I N -
G Q D D V P V P A A A A A W R E H T T A G S D R L R V L P G - G H F - - -
G A D D I H A A P E R L T A W Q D F T T A G F M R E I F P G - G H F Y L A A - - -
G D A D N L V M Q D E L L A W E K F T T R K T R T I I F A A D H F F V D K H F E Q V V - - -
  
```

**Supplementary Fig. 2.** Protein sequence alignment of ClbQ with other representative type I and type II thioesterases, showing that the Ser-His-Asp catalytic triad of type II but not type I TEs is conserved in ClbQ. However, variation of a few amino acid residues adjacent to the catalytic sites were observed and might portend an unusual catalytic function. The signature GX SXG motif containing the strictly conserved active site Ser and the GXHXX motif containing the catalytic His residue are in red frames. The characteristic Ser-His-Asp catalytic triad of thioesterase or thioesterase domain is highlighted by asterisks.

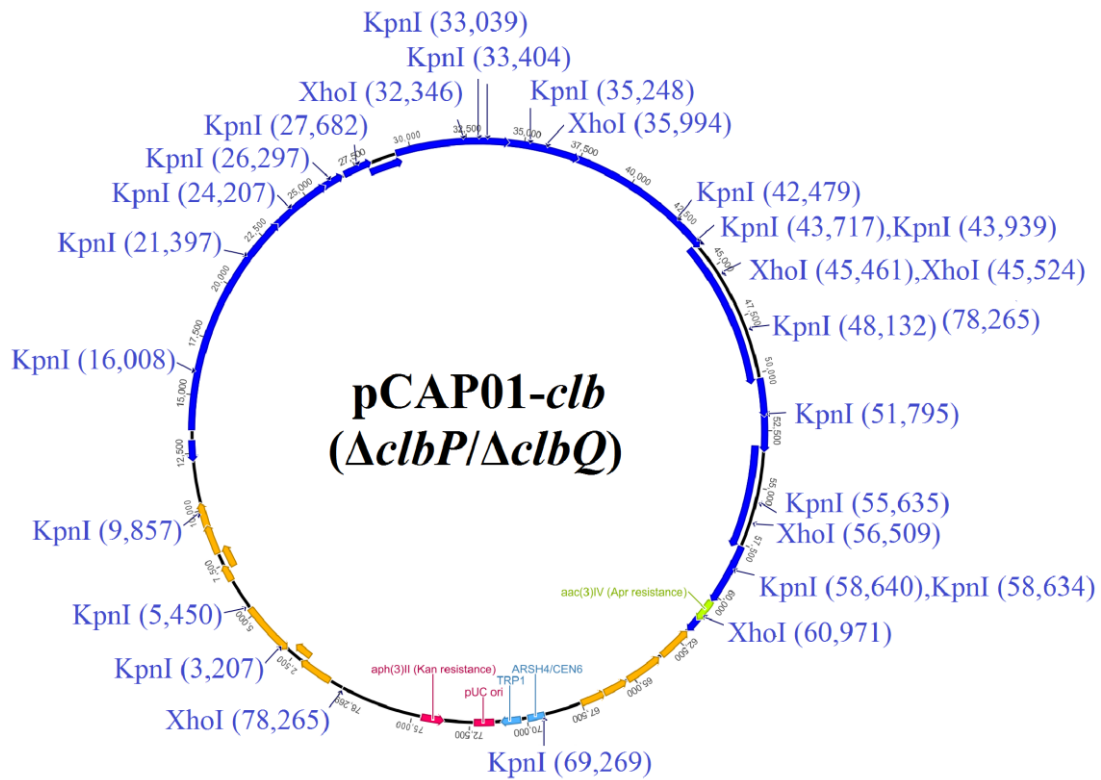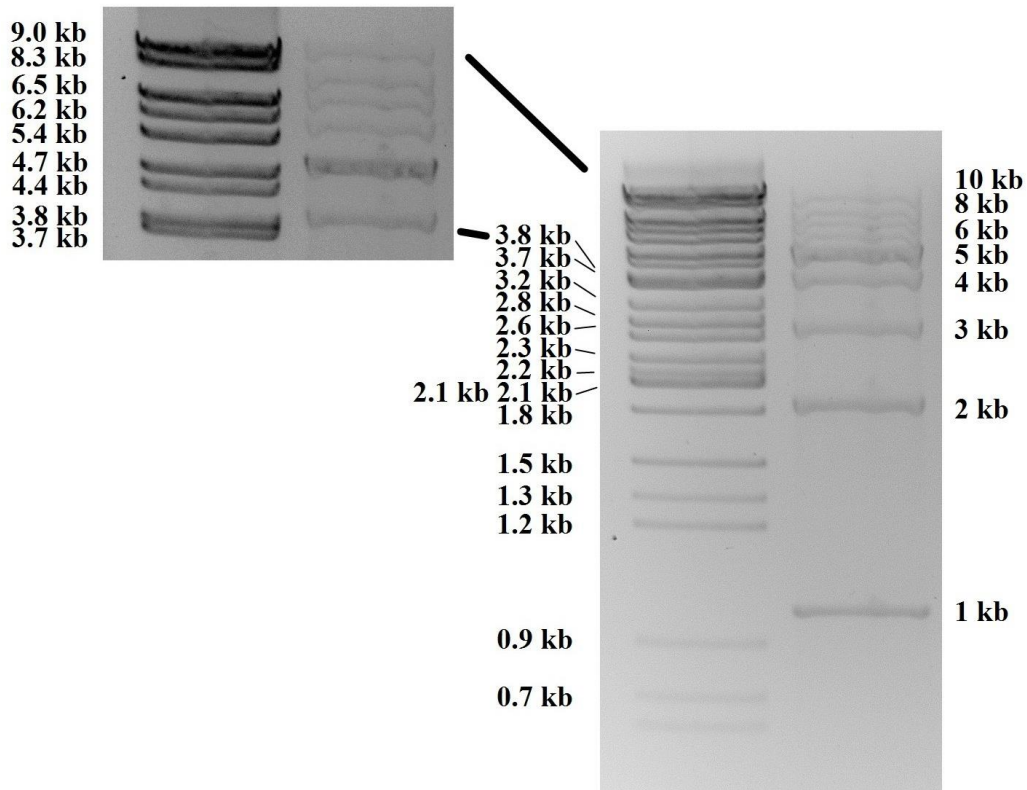

**Supplementary Fig. 3.** Physical map of bacterial artificial chromosome pCAP01-clb ( $\Delta clbP/\Delta clbQ$ ) with predicted KpnI + XhoI cleavage sites and restriction fragment sizes (upper) and the experimentally determined restriction map with KpnI + XhoI (lower).

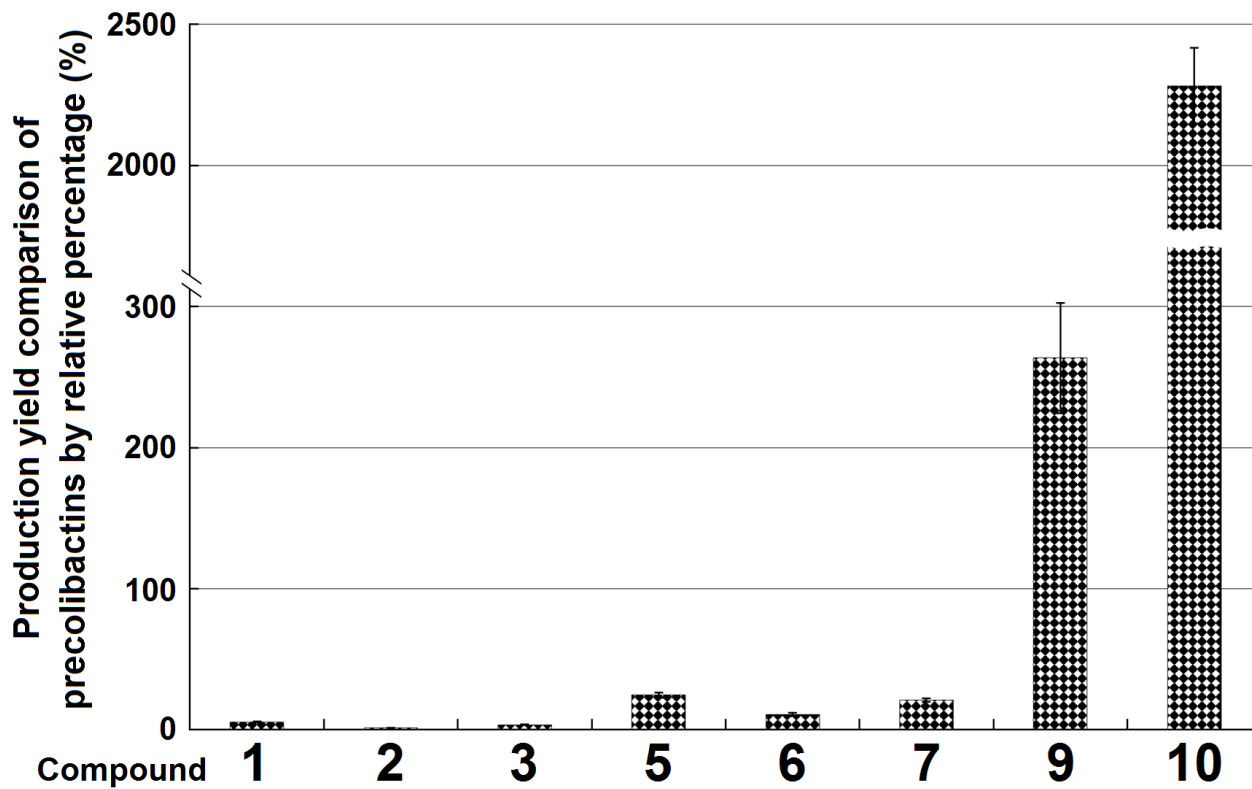

**Supplementary Fig. 4.** The abundance of individual *clb* pathway-related compound in *E. coli* DH10B/pCAP01-*clb* ( $\Delta clbP/\Delta clbQ$ ) relative to *E. coli* DH10B/pCAP01-*clb* ( $\Delta clbP$ ) (in percentage, %). All values are mean  $\pm$  SD;  $N = 5$ .

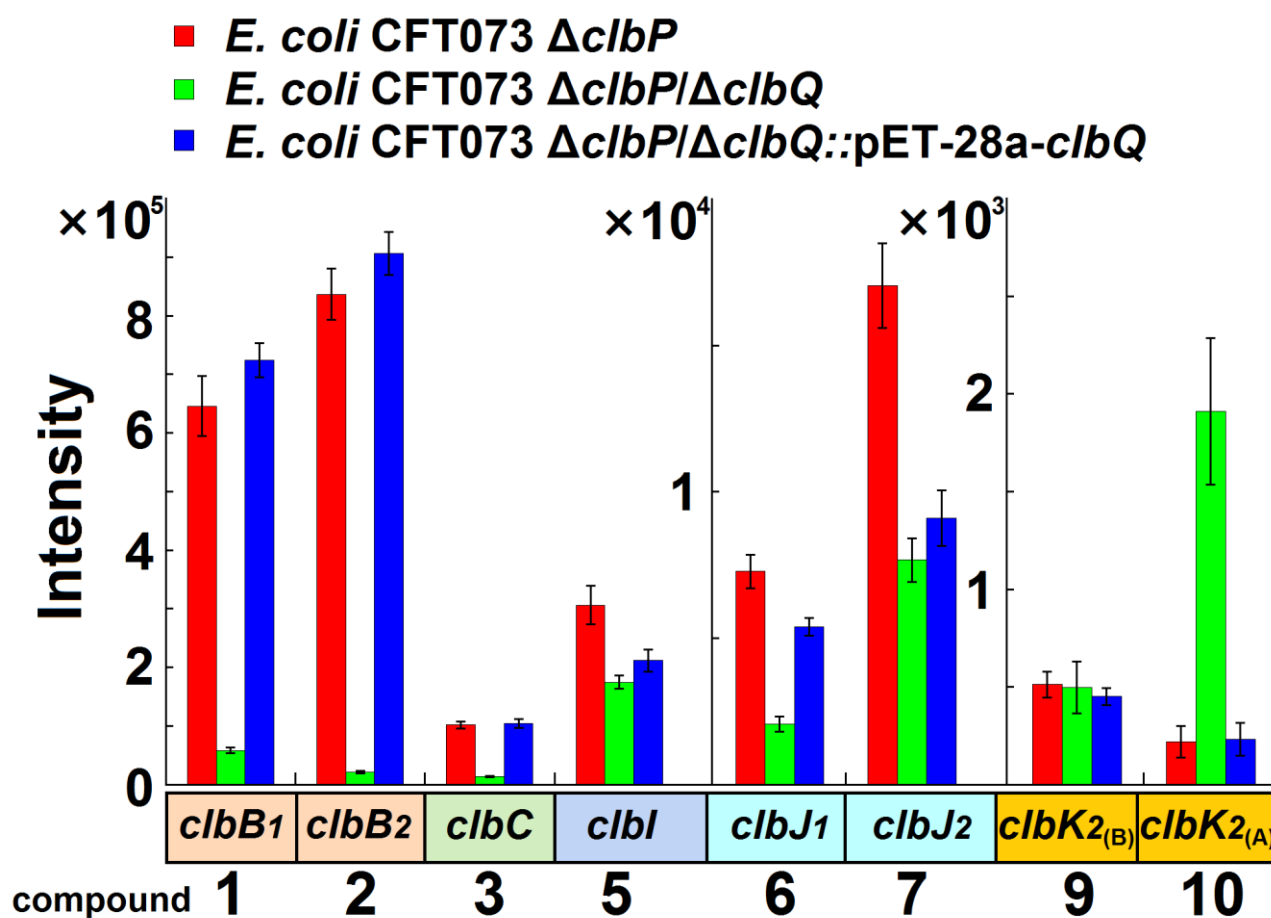

**Supplementary Fig. 5.** The comparison of the abundance of individual *clb* pathway-related compound from the extracts of colibactin native producer mutants *E. coli* CFT073  $\Delta clbP$ , *E. coli* CFT073  $\Delta clbP/\Delta clbQ$  and *E. coli* CFT073  $\Delta clbP/\Delta clbQ::pET-28a-clbQ$ , respectively. The extracted ion chromatograms corresponding to the same compound from different mutants were compared. All values are mean  $\pm$  SD;  $N = 5$ . This result showed the same trend as observed in the corresponding *clb*<sup>+</sup> heterologous expression host mutants (see **Figure 2** in the main text).

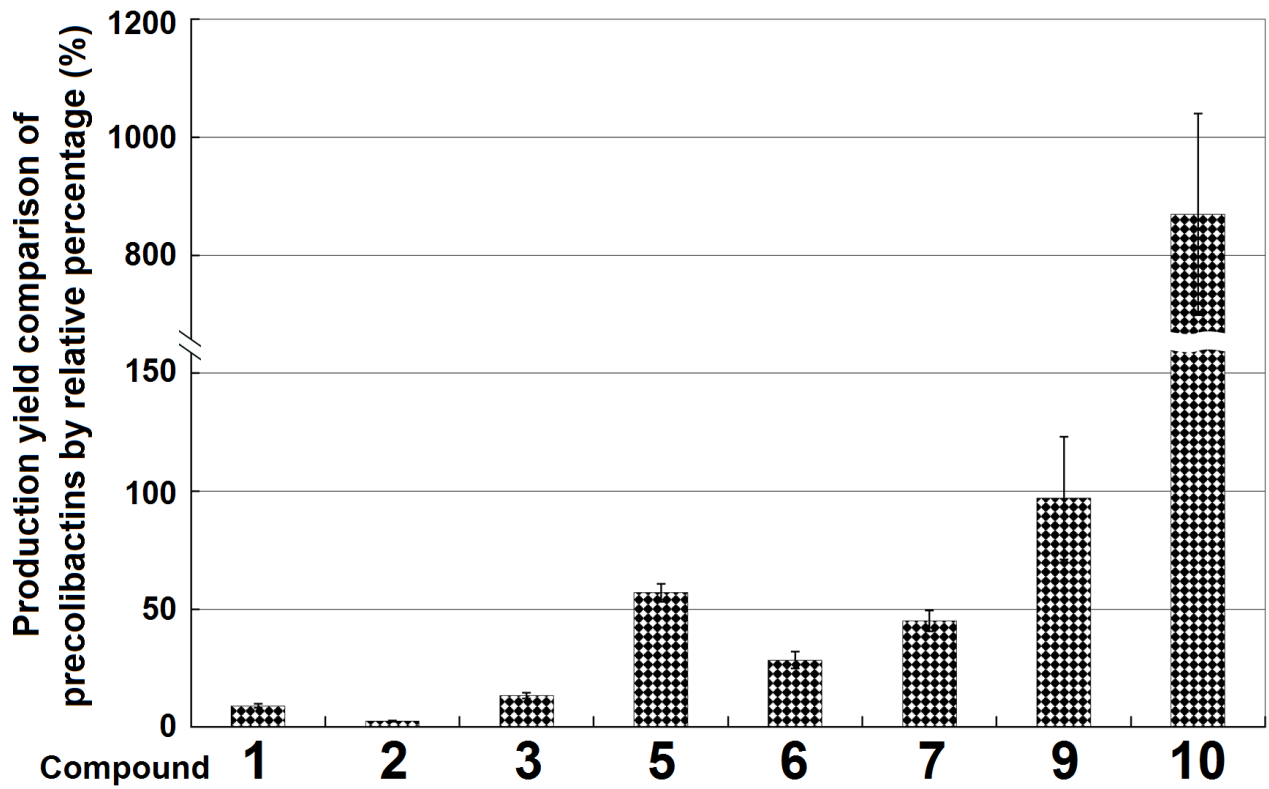

**Supplementary Fig. 6.** The abundance of individual *clb* pathway-related compound in *E. coli* CFT073  $\Delta clbP/\Delta clbQ$  relative to *E. coli* CFT073  $\Delta clbP$  (in percentage, %). All values are mean  $\pm$  SD;  $N = 5$ .



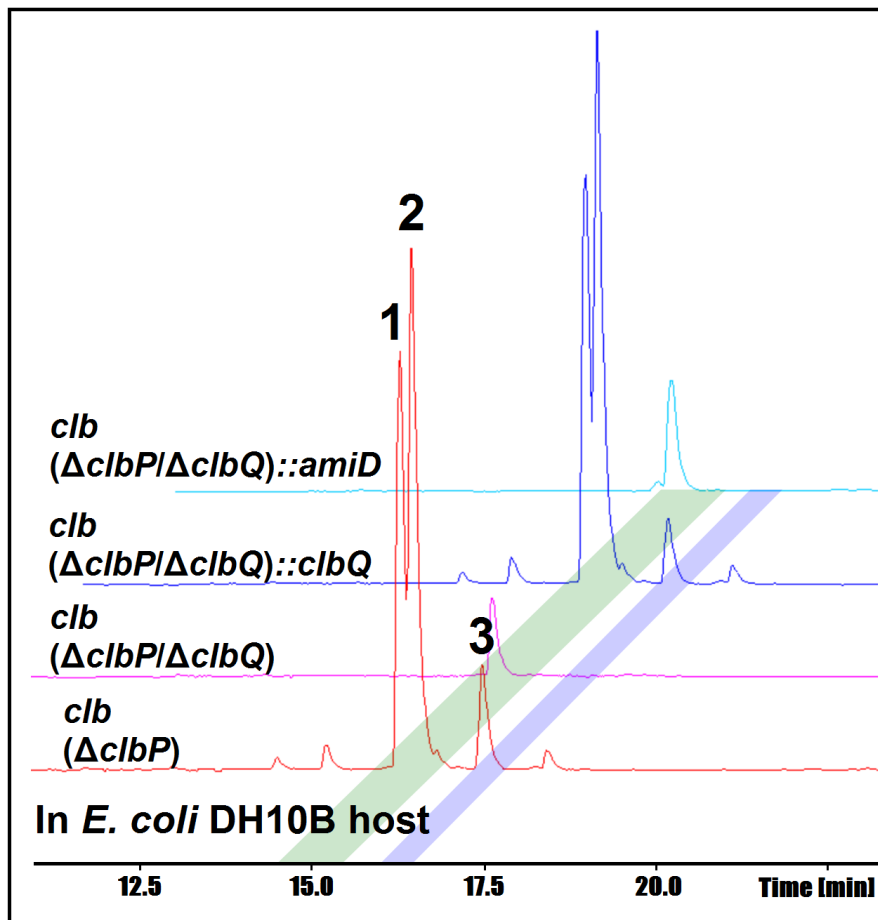

**Supplementary Fig. 7.** UPLC-MS extracted ion chromatogram traces displaying the production of the *clb* pathway-related compounds in the *clb*<sup>+</sup> *E. coli* DH10B  $\Delta clbP/\Delta clbQ$  mutant and the complementation strains with different thioesterase genes. Extracted ion chromatograms (EIC<sup>+</sup> =  $414.30 \pm 0.01$ ,  $442.33 \pm 0.01$  and  $440.35 \pm 0.01$ , corresponding to compounds **1**, **2** and **3**, respectively) of the extracts obtained from the *E. coli* DH10B carrying either pCAP01-*clb* ( $\Delta clbP$ ) or pCAP01-*clb* ( $\Delta clbP/\Delta clbQ$ ) were first compared. Then, a protein expression plasmid pETDuet-1 carrying ClbQ or AmiD was transformed into *E. coli* DH10B/pCAP01-*clb* ( $\Delta clbP/\Delta clbQ$ ) by electroporation. Their chemical profiles were compared, which showed that the unique activity of ClbQ in mediating intermediates off-loading could not be complemented by AmiD, the amicoumacin thioesterase close to ClbQ in phylogenetic analysis.

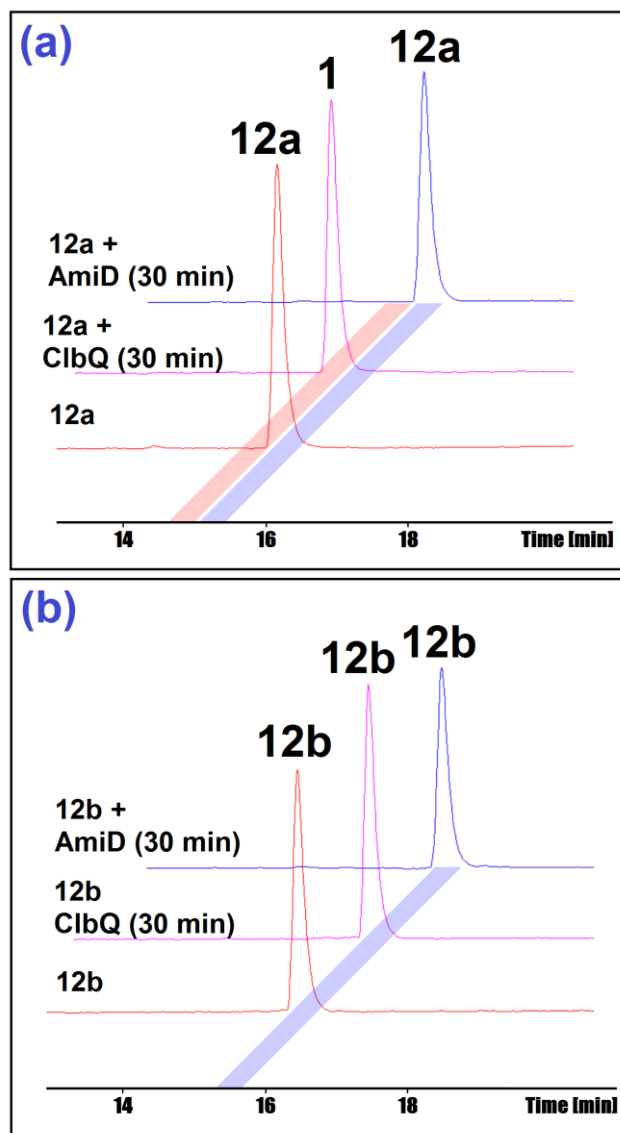

**Supplementary Fig. 8.** UPLC-MS extracted ion chromatogram traces displaying a complete hydrolysis of **12a** into **1** catalyzed by recombinant ClbQ, but not by recombinant AmiD, after an incubation at 30 °C for 30 min (a). Neither ClbQ nor AmiD could hydrolyze **12b** (b). These results showed that ClbQ is a highly selective thioesterase towards the SNAC derivatives of natural precolibactins.  $EIC^+ = 414.30 \pm 0.01$  and  $515.33 \pm 0.01$ , corresponding to precolibactin-413 (**1**) and its two SNAC thioester epimers (**12a** and **12b**).

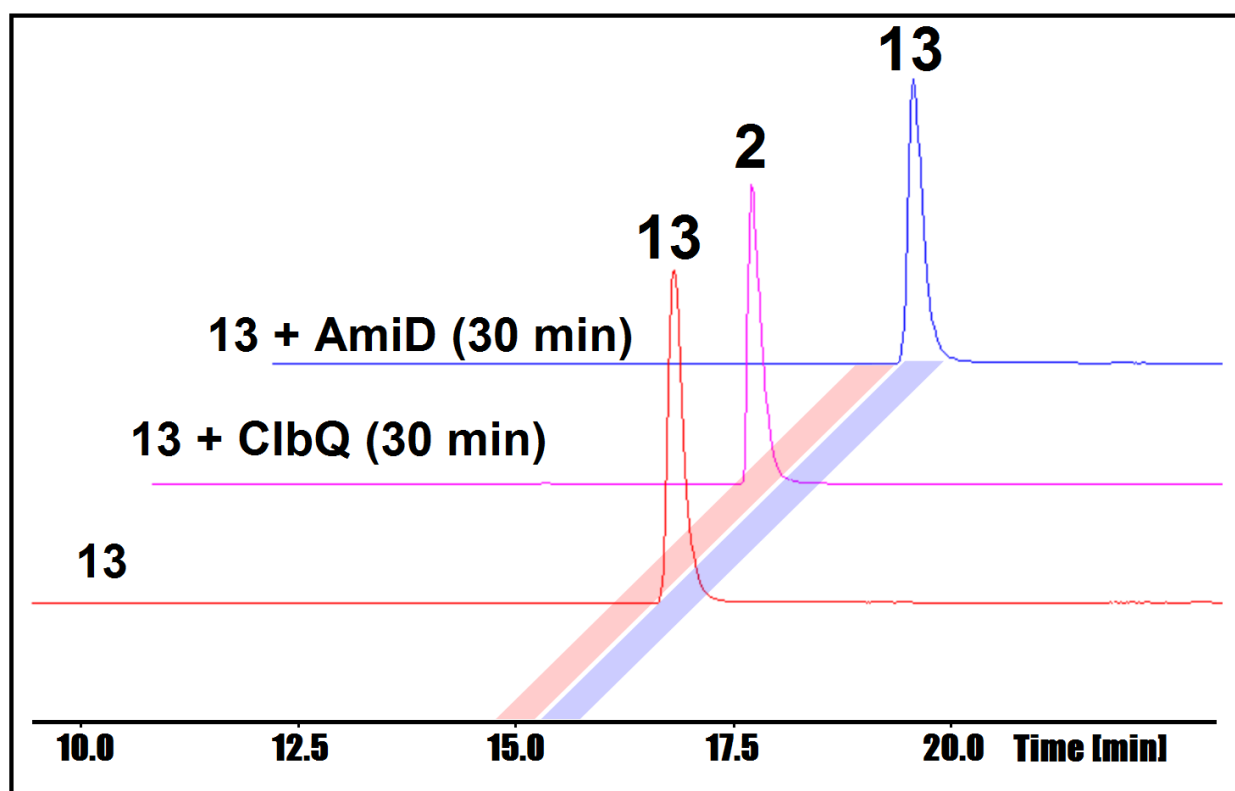

**Supplementary Fig. 9.** UPLC-MS extracted ion chromatogram traces showing a complete hydrolysis of **13** into **2** by recombinant ClbQ, but not by recombinant AmiD, after an incubation at 30 °C for 30 min. EIC+ =  $442.33 \pm 0.01$  and  $543.36 \pm 0.01$ , corresponding to the precolibactin-441 (**2**) and its SNAC thioester (**13**).

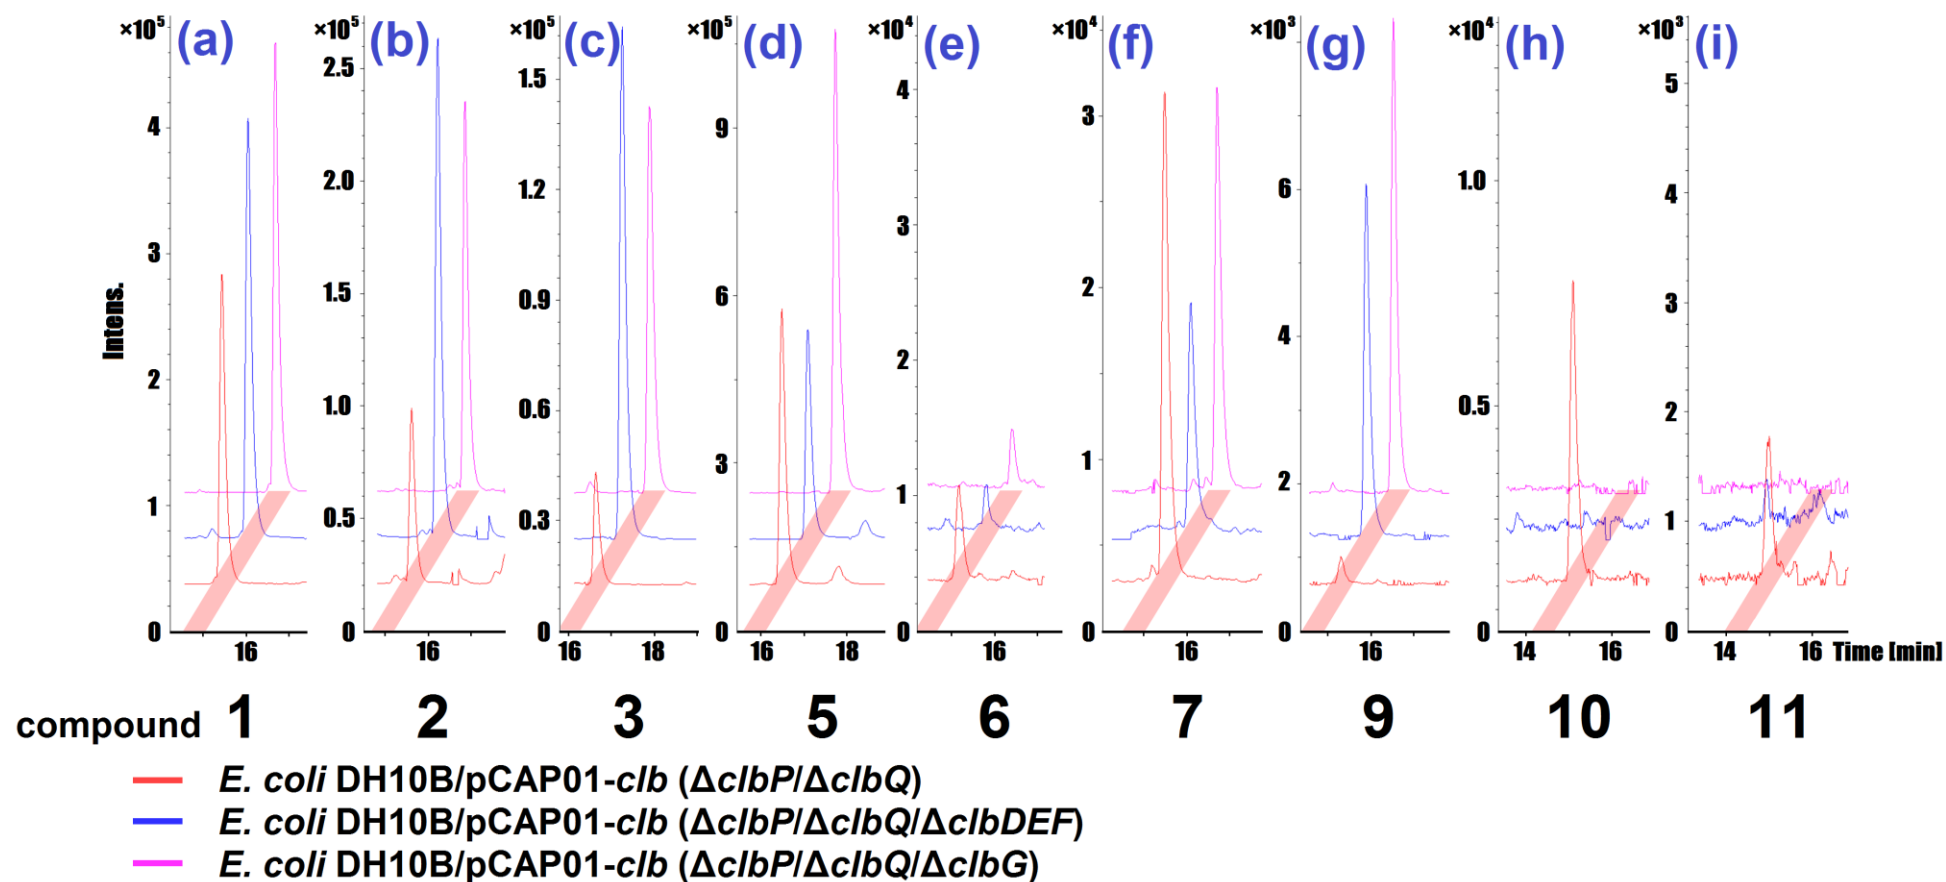

**Supplementary Fig. 10.** The comparison of UPLC-MS extracted ion chromatogram traces of the EtOAc extracts of *E. coli* DH10B/pCAP01-*clb* and its  $\Delta clbDEF$  and  $\Delta clbG$  mutants. EIC<sub>+</sub> = 414.30 ± 0.01, 442.33 ± 0.01, 440.35 ± 0.01, 547.39 ± 0.01, 630.39 ± 0.01, 713.37 ± 0.01, 796.35 ± 0.01, 887.38 ± 0.01 and 970.37 ± 0.01, corresponding to compounds **1**, **2**, **3**, **5**, **6**, **7**, **9**, **10** and **11**. This systematic gene disruption result showed that the aminomalonyl-ACP biosynthetic gene cassette *clbDEF* and the *trans*-AT encoding gene *clbG* were involved in the biosynthesis of **10** and **11**.

**a**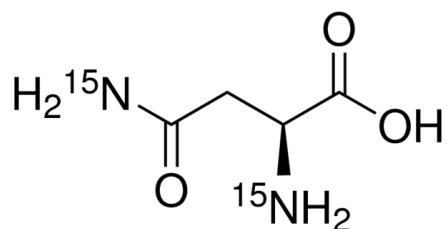**b**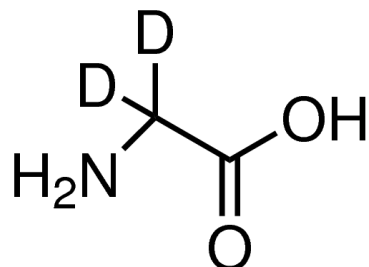**c**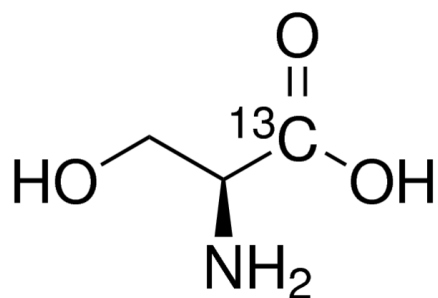**d**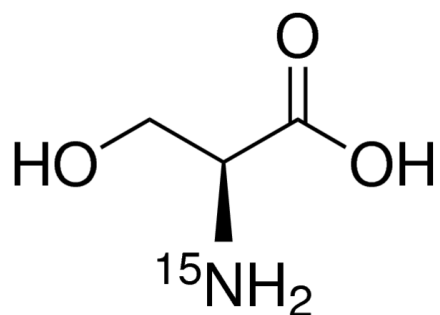

**Supplementary Fig. 11.** The structures of isotope-labelled amino acids used in the present study. (a) L-[<sup>15</sup>N<sub>2</sub>]asparagine; (b) [2,2-D<sub>2</sub>]glycine; (c) L-[1-<sup>13</sup>C]serine; (d) L-[<sup>15</sup>N]serine. Structures were referred to the Official Website of Sigma-Aldrich Co. LLC.

<http://www.sigmaaldrich.com>

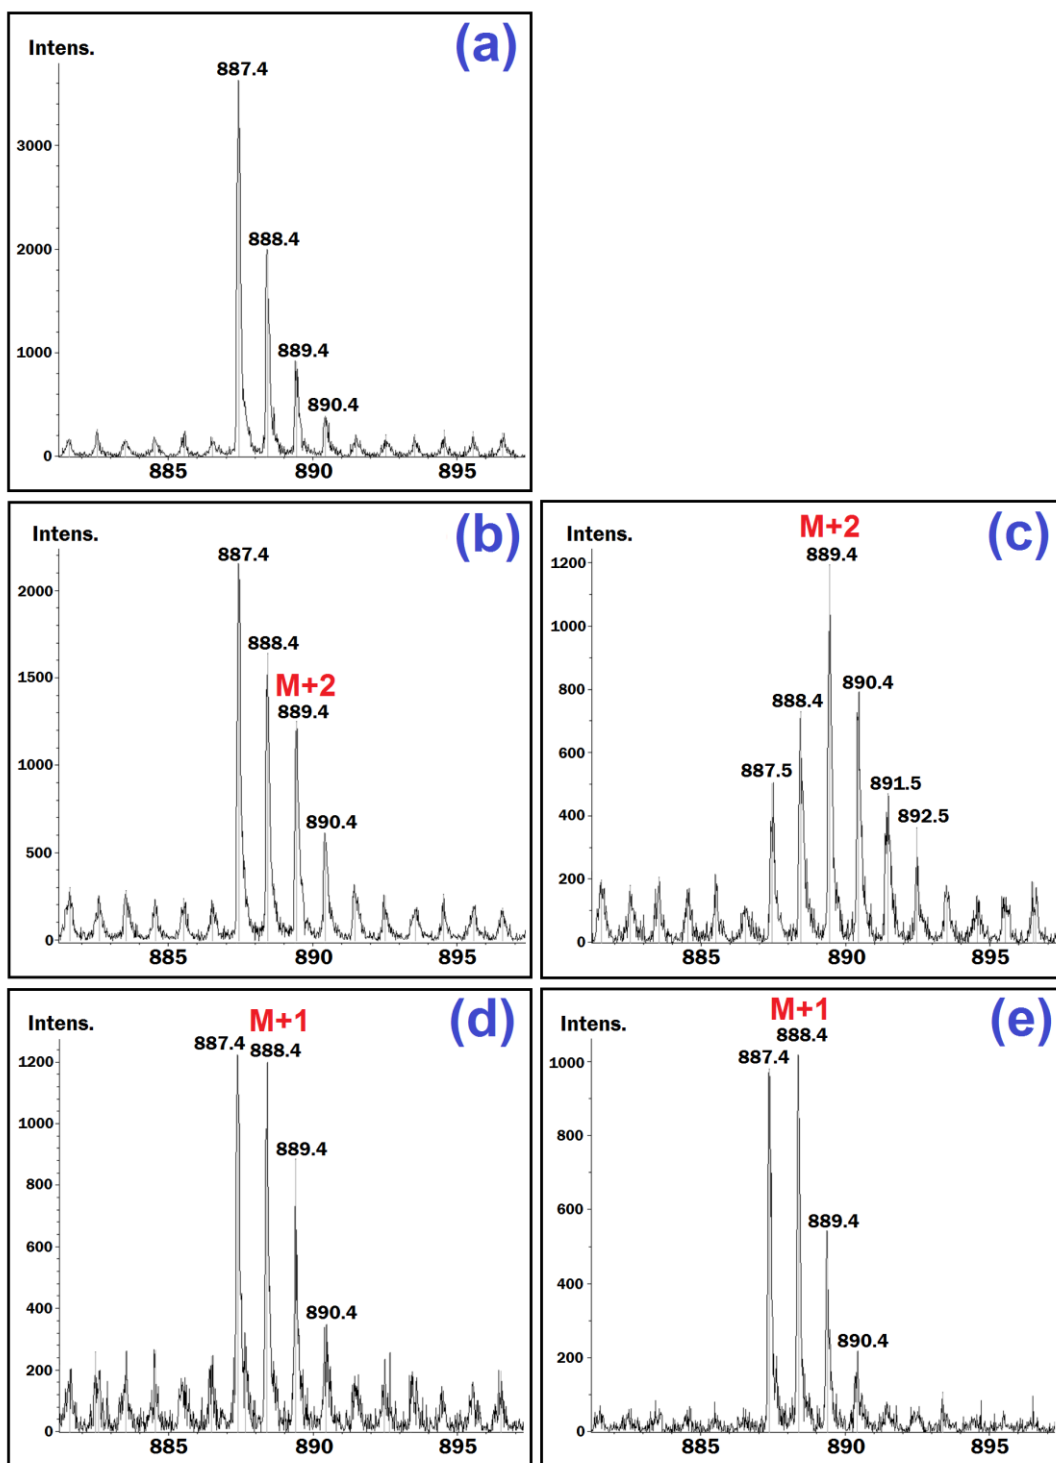

**Supplementary Fig. 12.** UPLC-MS analysis of the feeding experiment. L-[ $^{15}\text{N}_2$ ]asparagine (b), [2,2- $\text{D}_2$ ]glycine (c), L-[1- $^{13}\text{C}$ ]serine (d) or L-[ $^{15}\text{N}$ ]serine (e) at a concentration of 0.5 mg/mL was added into the Luria-Bertani media for culturing the heterologous expression host *E. coli* DH10B harboring pCAP01-*clb* ( $\Delta clbP/\Delta clbQ$ ). Compared to the control without isotope feeding (a), the isotope-labeled versions of compound **10** were observed, displaying mass shifts of [M + 2] (b), [M + 2] (c), [M + 1] (d) and [M + 1] (e), respectively.

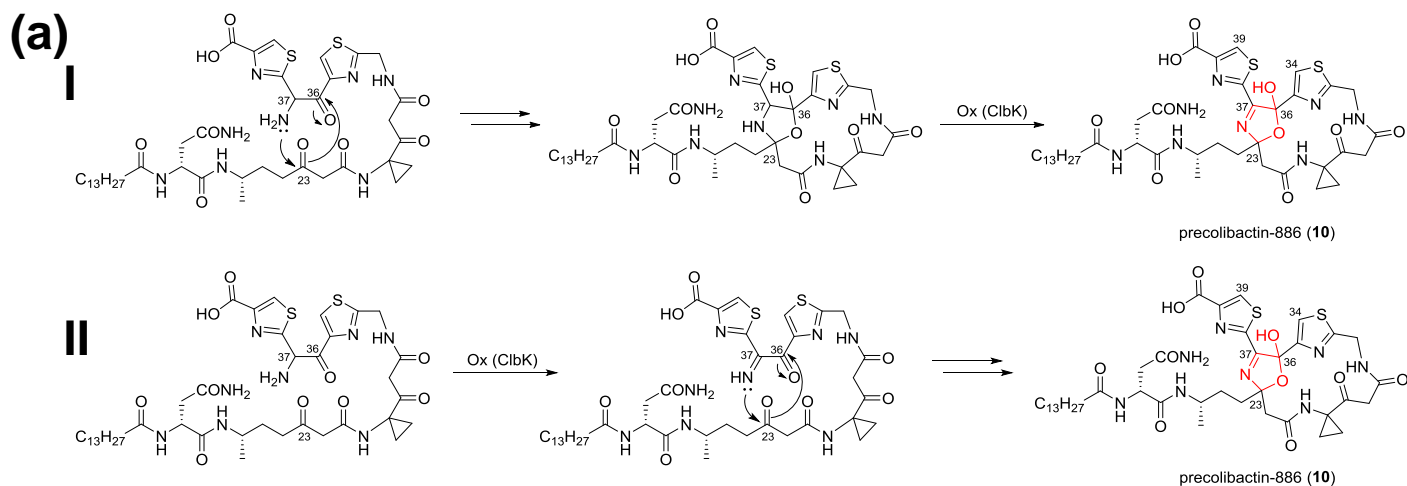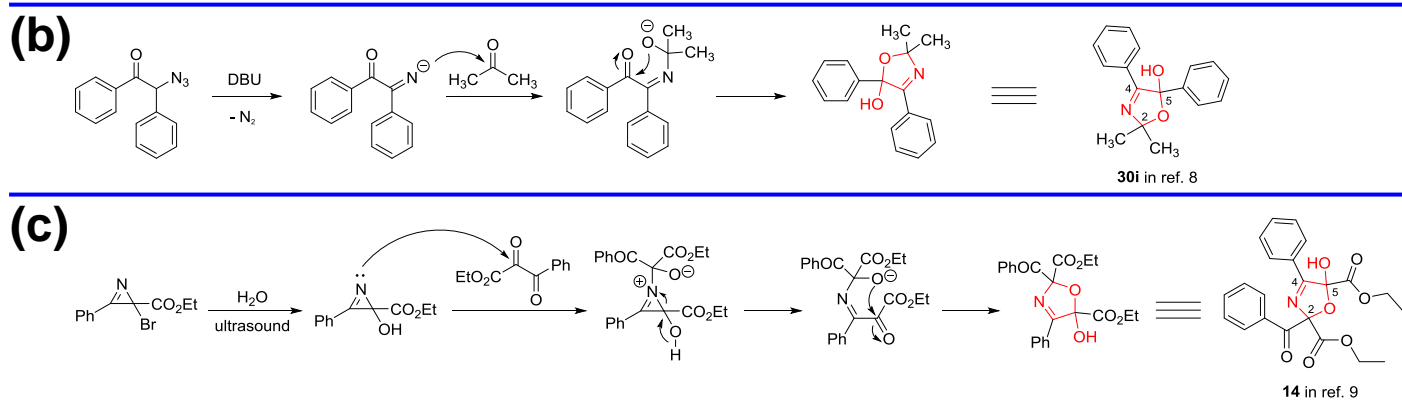

**(d)**

| <b>10 in this study</b> | <b>chemical shift<br/>(in DMSO-<i>d</i><sub>6</sub>)</b> | <b>30i in ref. 8</b> | <b>chemical shift<br/>(in CDCl<sub>3</sub>)</b> | <b>14 in ref. 9</b> | <b>chemical shift<br/>(in CDCl<sub>3</sub>)</b> |
|-------------------------|----------------------------------------------------------|----------------------|-------------------------------------------------|---------------------|-------------------------------------------------|
| C-23                    | 107.8                                                    | C-2                  | 107.3                                           | C-2                 | 105.5                                           |
| C-36                    | 107.6                                                    | C-5                  | 108.5                                           | C-5                 | 109.9                                           |
| C-37                    | 160.4                                                    | C-4                  | 165.4                                           | C-4                 | 165.5                                           |

**Supplementary Fig. 13.** Comparison of the generation mechanism and NMR chemical shifts of the unique 2,5-dihydro-5-hydroxyoxazole ring in precolibactin-886 (**10**) and previously synthesized compounds. (a) Proposed biosynthesis of the 2,5-dihydro-5-hydroxyoxazole ring in precolibactin-886 (**10**). It could be envisioned that the precursor ketone at C-23, a chemically reactive site of the linear assembly product and the point of cyclization in other cyclic precolibactins, could undergo a nucleophilic attack by the aminomalonyl-derived nitrogen atom, and the resultant oxoanion at C-23 could further attack another ketone at C-36 to form a unique 2,5-dihydro-5-hydroxyoxazole ring. The double bond between C-37 and N-37 is speculated to be introduced by the oxidation domain of ClbK that has been previously proposed to install both the  $\Delta^{34}$  and  $\Delta^{39}$  double bonds of the two thiazole rings<sup>7</sup>. The timing of the introduction of this unsaturation is currently not clear, could be either prior to (as in II) or after (as in I) the formation of the oxazolidin-5-ol heterocycle. This proposed biosynthesis of the 2,5-dihydro-5-hydroxyoxazole ring in precolibactin-886 (**10**) is consistent with previously reported synthetic strategies for the preparation of

2,5-dihydro-5-hydroxyoxazoles shown in (b) and (c). (b) Nucleophilic addition of an imino anion to a ketone followed by a spontaneous intramolecular cyclization as a synthetic entry to a 2,5-dihydro-5-hydroxyoxazole compound (**30i** in ref. 8)<sup>8</sup>. (c) Preparation of a 2,5-dihydro-5-hydroxyoxazole compound (**14** in ref. 9) from 2-halo-2*H*-azirine features the same nucleophilic addition and cyclization process in the generation of 2,5-dihydro-5-hydroxyoxazole compounds<sup>9</sup>. (d) Comparison of the <sup>13</sup>C NMR chemical shifts of the 2,5-dihydro-5-hydroxyoxazole ring in precolibactin-886 (**10**) and synthetic compounds **30i** (in ref. 8) and **14** (in ref. 9).



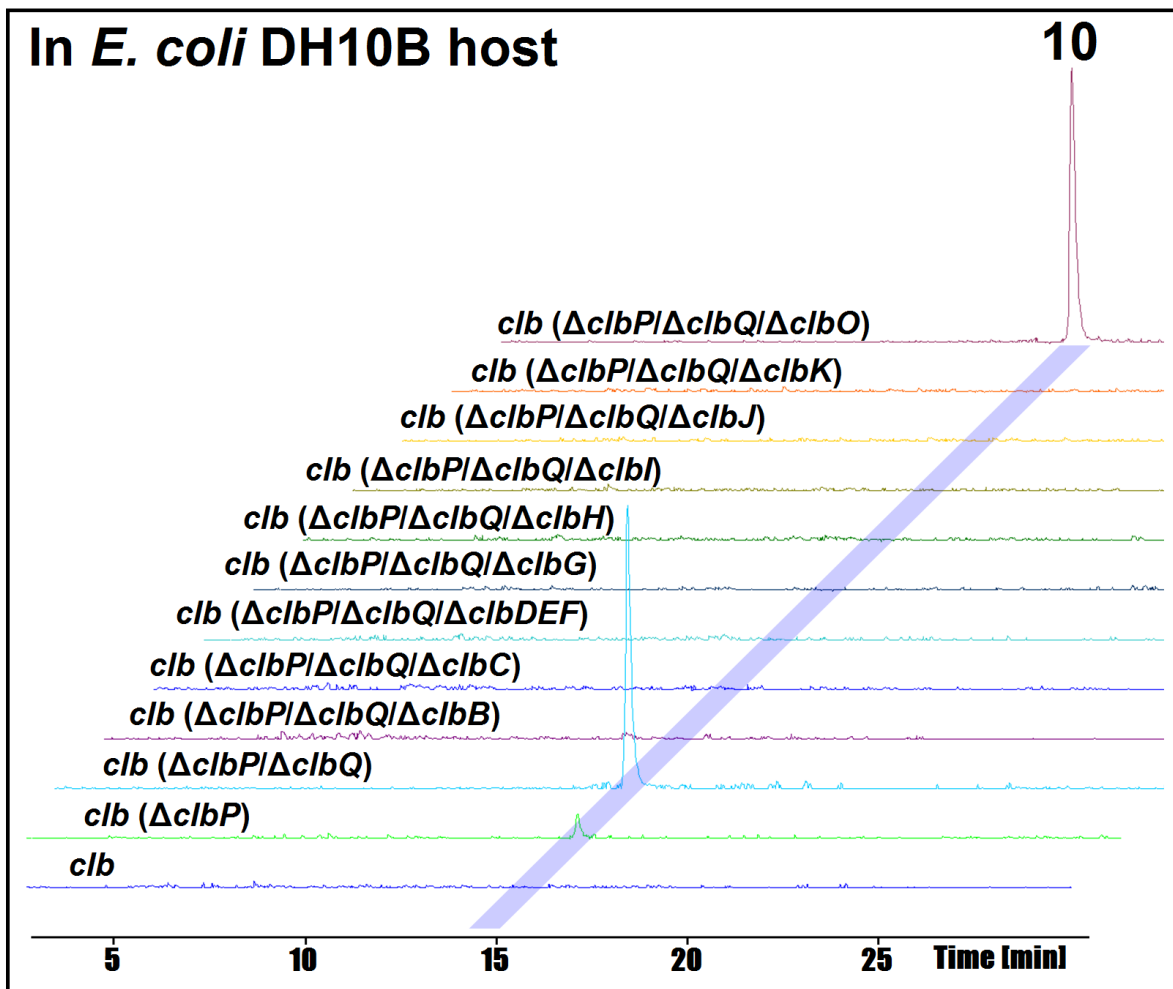

**Supplementary Fig. 14.** The comparison of UPLC-MS extracted ion chromatogram traces of the EtOAc extracts of *E. coli* DH10B/pCAP01-*clb* and its eleven mutants.  $EIC^+ = 887.38 \pm 0.01$ , corresponding to compound **10** (precolibactin-886). This systematic gene disruption result showed that only ClbO, the last PKS module of the *clb* pathway, was not involved in the biosynthesis of **10**.

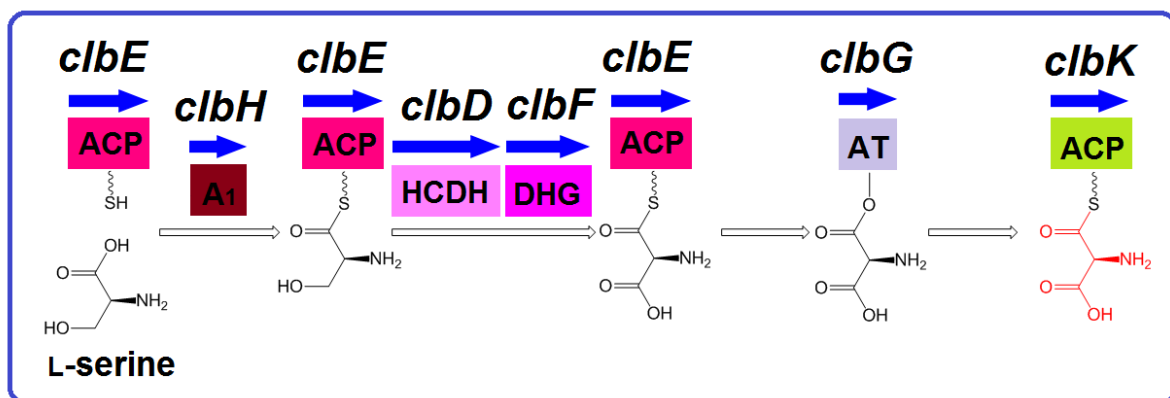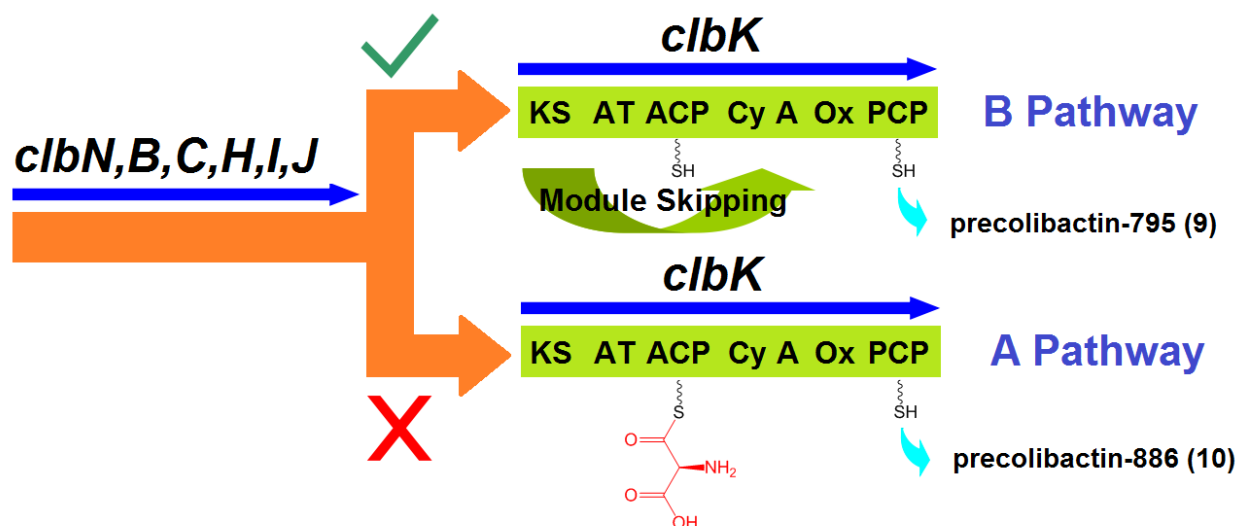

**Supplementary Fig. 15.** Inactivation of either *clbG* or *clbDEF* would prevent the generation and utilization of the aminomalonyl-ACP extender unit, and thus block path A and significantly redirect the overall pathway flux into path B.

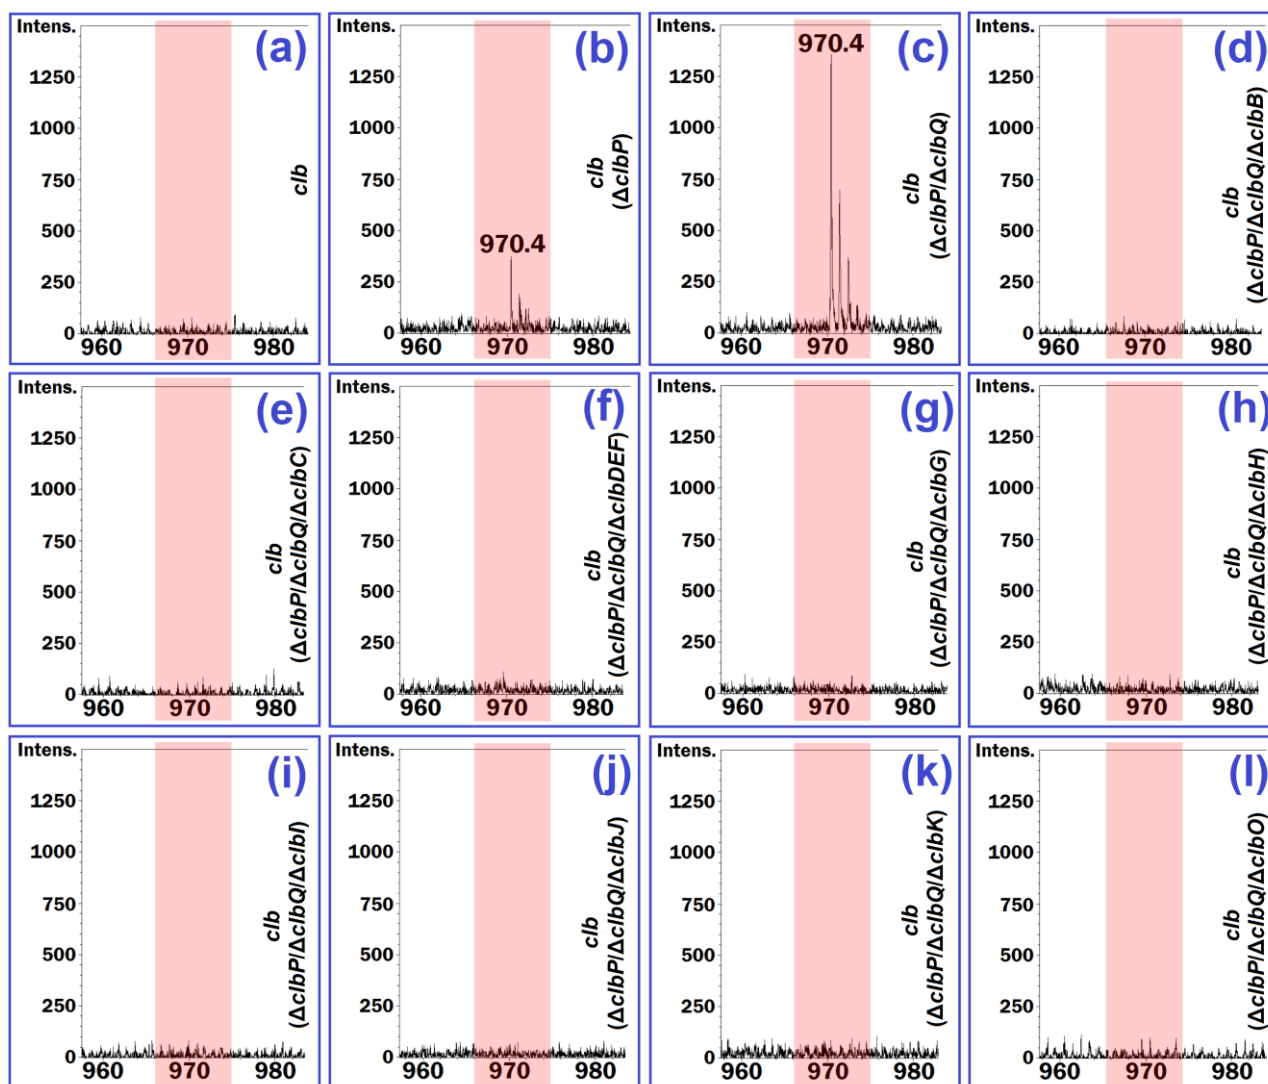

**Supplementary Fig. 16.** A systematic gene disruption experiment was performed to examine the genes involved in the biosynthesis of precolibacin-969 (**11**). The result showed that any additional knockout of *clbB* (d), *clbC* (e), *clbDEF* (f), *clbG* (g), *clbH* (h), *clbI* (i), *clbJ* (j), *clbK* (k) or *clbO* (l) from the *E. coli* DH10B cells harboring pCAP01-*clb* ( $\Delta clbP/\Delta clbQ$ ) completely abolished the production of **11**. The MS spectra obtained from the extracts of *E. coli* DH10B/pCAP01-*clb* ( $\Delta clbP$ ) (b) and *E. coli* DH10B/pCAP01-*clb* ( $\Delta clbP/\Delta clbQ$ ) (c) were used as positive controls, and that of *E. coli* DH10B/pCAP01-*clb* (a) was used as a negative control.

**(a)**

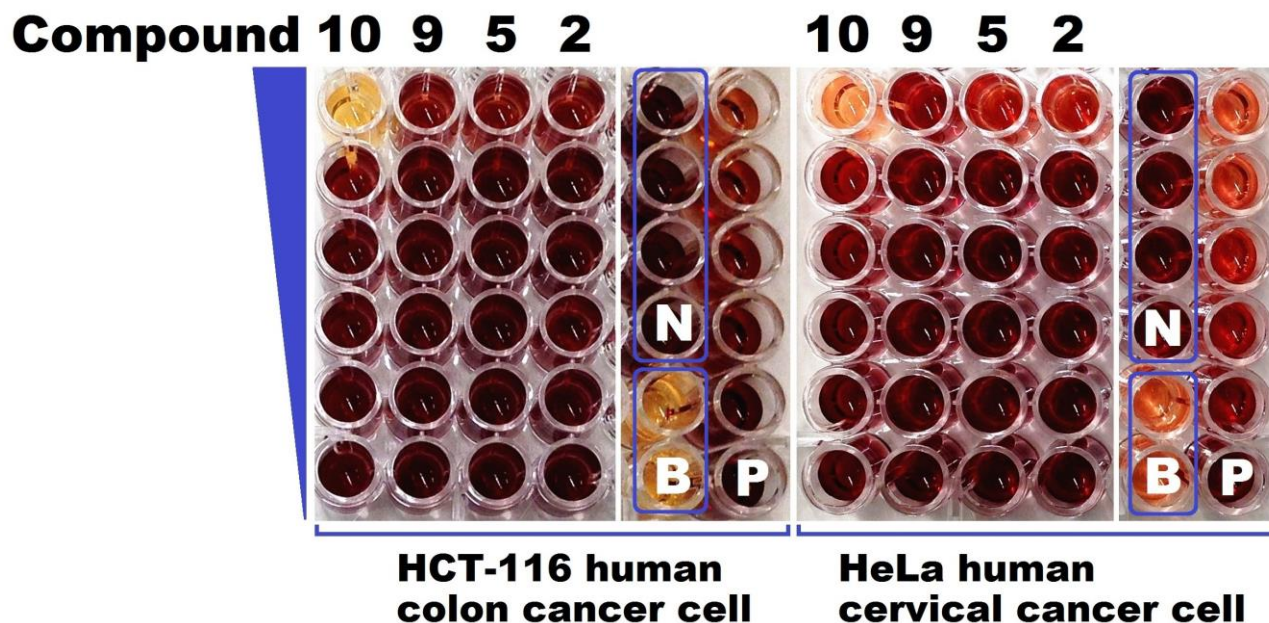

**(b)**

|                                                    | <b>IC<sub>50</sub> (μM)</b> |                |                    |                |
|----------------------------------------------------|-----------------------------|----------------|--------------------|----------------|
|                                                    | <b>10</b>                   | <b>9</b>       | <b>5</b>           | <b>2</b>       |
| <b>HCT-116</b><br><b>(human colon cancer cell)</b> | <b>22.3 ± 4.1</b>           | <b>&gt;100</b> | <b>97.9 ± 14.7</b> | <b>&gt;100</b> |
| <b>HeLa</b><br><b>(human cervical cancer cell)</b> | <b>34.0 ± 5.5</b>           | <b>&gt;100</b> | <b>&gt;100</b>     | <b>&gt;100</b> |

**Supplementary Fig. 17.** Cytotoxicity of selected precolibactins. (a) Precolibactin-441 (**2**), -546 (**5**), -795 (**9**), and -886 (**10**) that represent linear, aza-spirocyclopropane, bithiazole, and aminomalonate-containing structural derivatives, respectively, were evaluated in a 96-well plate MTS/PMS cytotoxicity assay against HCT-116 human colon carcinoma and HeLa human cervical carcinoma cell lines, respectively, in concentrations diluted serially from top to bottom rows (78.1, 19.5, 4.88, 1.22, 0.31, and 0.076 μg/mL, respectively). The color indicates cell viability (darker is more viable and thus less cytotoxic). N: negative control (DMSO, final concentration 0.75%); B: blank culture media without cells (McCoy's 5A media for HCT-116 testing and DMEM media for HeLa testing); P: positive control (etoposide, IC<sub>50</sub> 2.0 ± 0.36 and 1.1 ± 0.19 μM against HCT-116 and HeLa cells, respectively). (b) IC<sub>50</sub> (the concentration inhibiting cell growth by 50%) values of selected precolibactins **2**, **5**, **9**, and **10**, expressed as mean ± SD, *N* = 3.

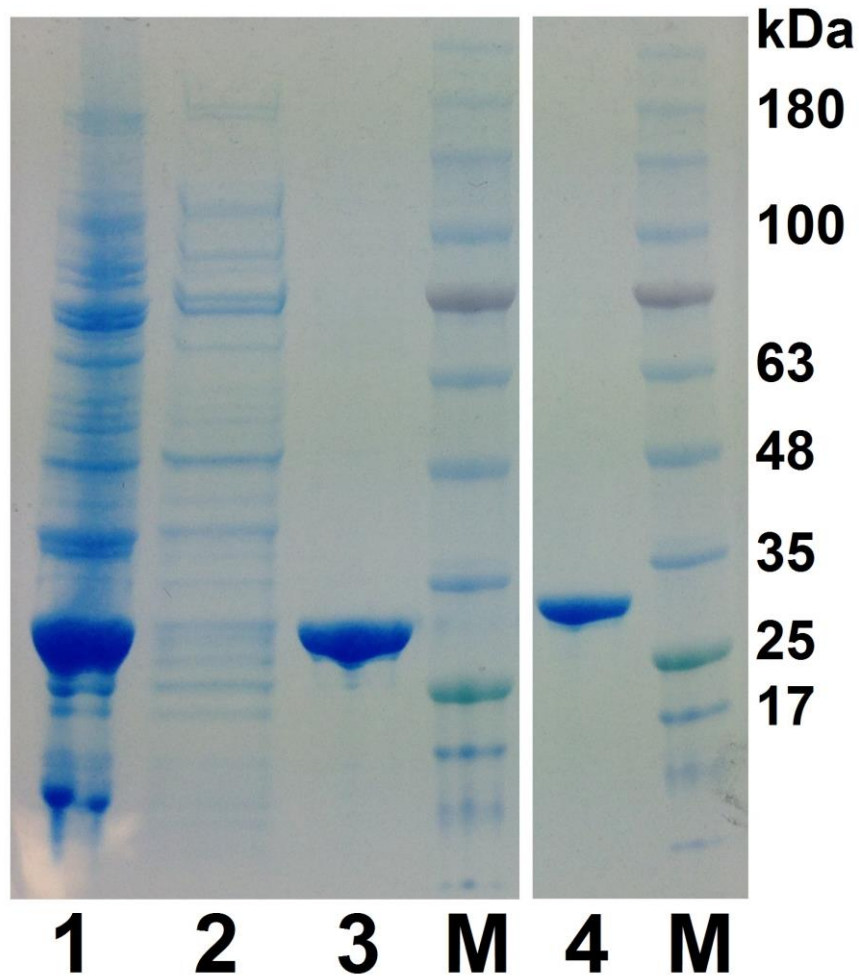

**Supplementary Fig. 18.** SDS-PAGE analysis of protein expression of recombinant thioesterases from *E. coli* BL21 (DE3)/pLysE/pET28a-*clbQ* and *E. coli* BL21 (DE3)/pLysE/pET28a-*amiD* cells. Columns 1 and 2: insoluble and soluble fractions of ClbQ expression, showing a poor solubility of *N*-His<sub>6</sub>-ClbQ expressed. Column 3: purified *N*-His<sub>6</sub>-ClbQ. Column 4: purified *N*-His<sub>6</sub>-AmiD. Column M: marker.

## Supplementary References

1. Brotherton, C.A. & Balskus, E.P. *J. Am. Chem. Soc.* **135**, 3359–3362 (2013).
2. Li, Z.R. *et al. ChemBioChem* **16**, 1715–1719 (2015).
3. Li, Y. *et al. Sci. Rep.* **5**, 9383 (2015).
4. Datsenko, K.A. & Wanner, B.L. *Proc. Natl. Acad. Sci. USA* **97**, 6640–6645 (2000).
5. Gust, B. *et al. Proc. Natl. Acad. Sci. USA* **100**, 1541–1546 (2003).
6. Wagner, J.K., Marquis, K.A. & Rudner, D.Z. *Mol. Microbiol.* **73**, 963–974 (2009).
7. Zha, L., Wilson, M.R., Brotherton, C.A. & Balskus, E.P. *ACS Chem. Biol.* **11**, 1287–1295 (2016).
8. Patonay, T. & Hoffman, R.V. *J. Org. Chem.* **60**, 2368–2377 (1995).
9. Pinho e Melo, T.M.V.D. *et al. J. Org. Chem.* **67**, 66–71 (2002).
