# Supplementary material
Source: PubMed Central journal article supplement (PMC5030165)
Supplement: NIHMS803519-supplement-2.pdf [file NIHMS803519-supplement-2.pdf]

## Supplementary Note

### Supplementary Note 1

#### Supplementary Note 1.1

UPLC-MS detection of *N*-acetylcysteamine (SNAC) thioesters P2

#### Supplementary Note 1.2

Structure characterization data of compounds **12a** and **12b** P3

#### Supplementary Note 1.3

Structure characterization data of compound **13** P6

#### Supplementary Note 1.4

Structure characterization data of compound **14** P13

### Supplementary Note 2

Structure characterization data of compound **10** P22

### Supplementary Note 3

Structure characterization data of compound **6** P39

## Supplementary Note 1

### Supplementary Note 1.1

UPLC-MS detection of *N*-acetylcysteamine (SNAC) thioesters

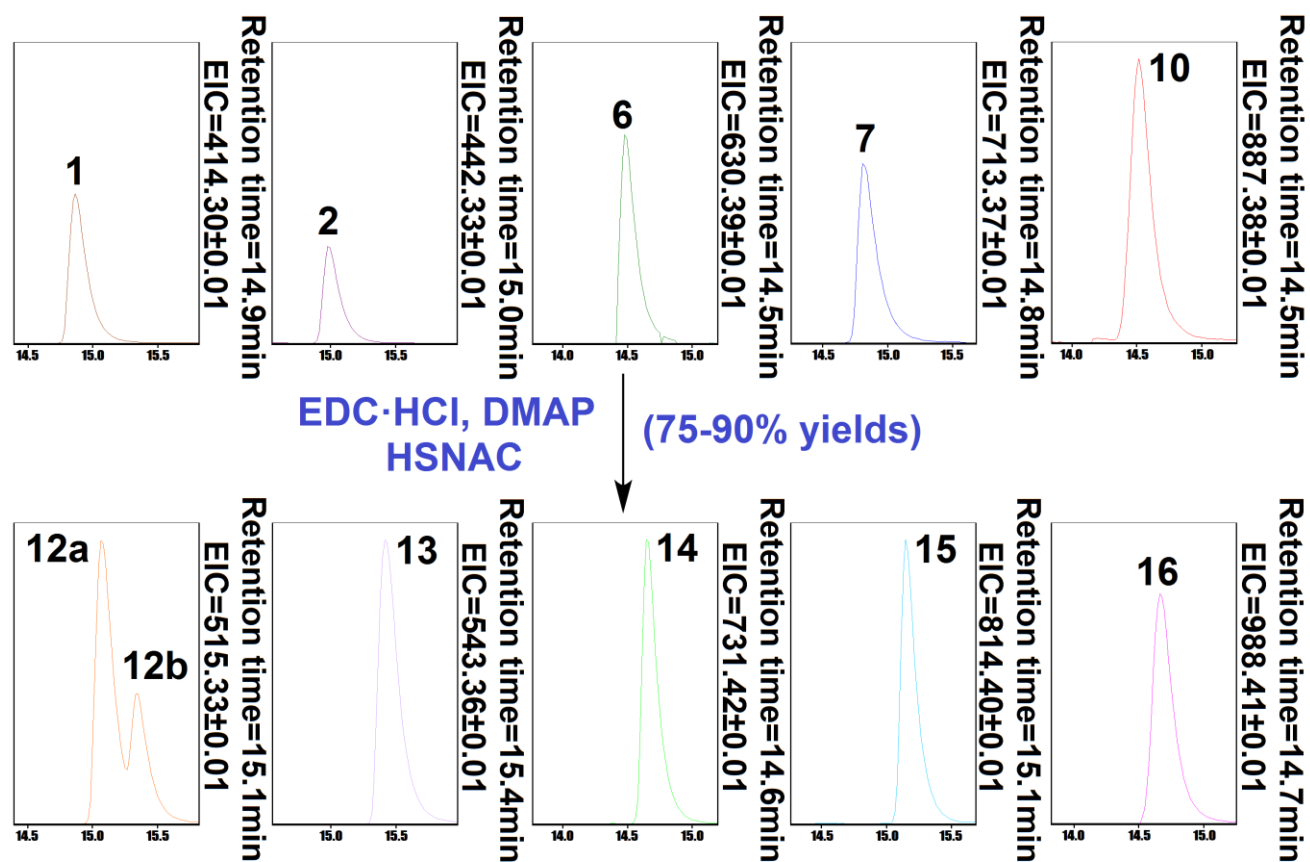

UPLC-MS extracted ion chromatograms of compounds **1**, **2**, **6**, **7**, **10** and their corresponding *N*-acetylcysteamine (SNAC) thioesters, **12–16**, synthesized via EDC/DMAP coupling reactions.

## Supplementary Note 1.2

Structure characterization data of compounds **12a** and **12b**

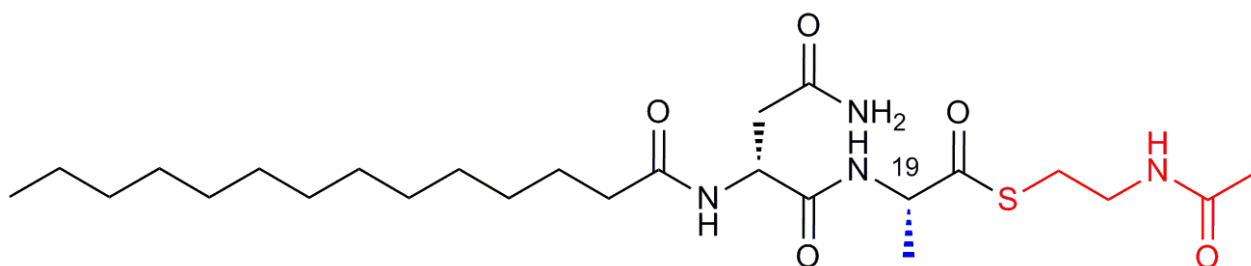

**12a**

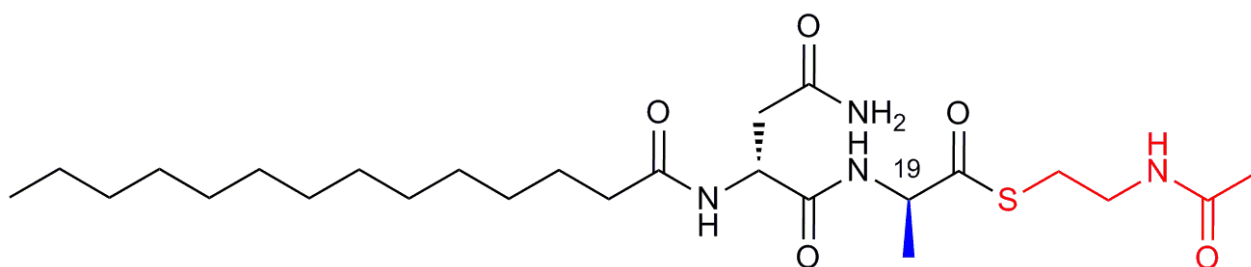

**12b**

The chemical structures of two *N*-acetylcysteamine (SNAC) thioester diastereomers (**12a** and **12b**) of compound **1** (precolibactin-413).

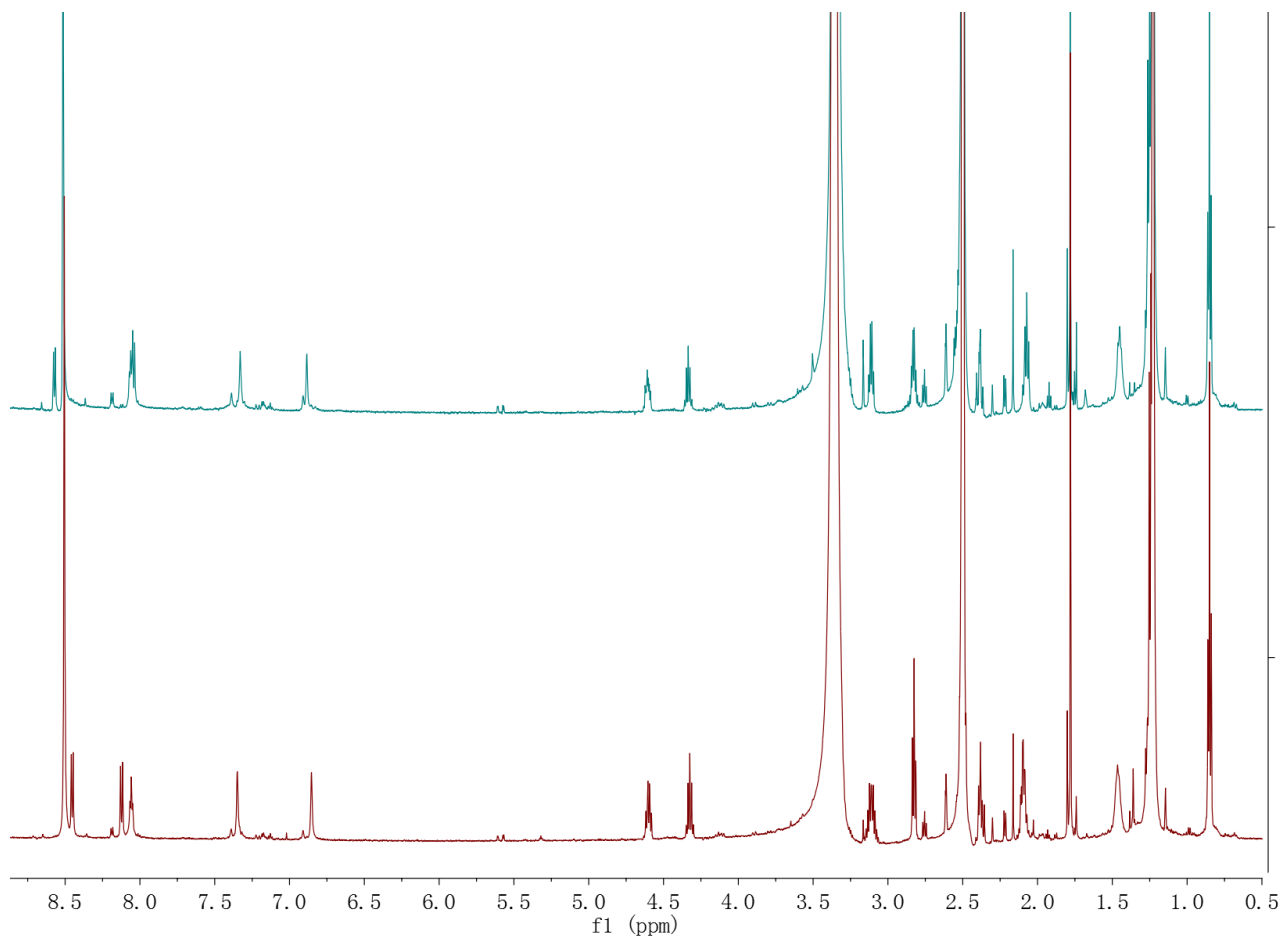

Overlay of the  $^1\text{H}$  NMR spectra of **12a** and **12b**. The spectra were recorded in  $\text{DMSO-}d_6$  at 600 MHz. (Maroon = **12a**; Teal = **12b**).

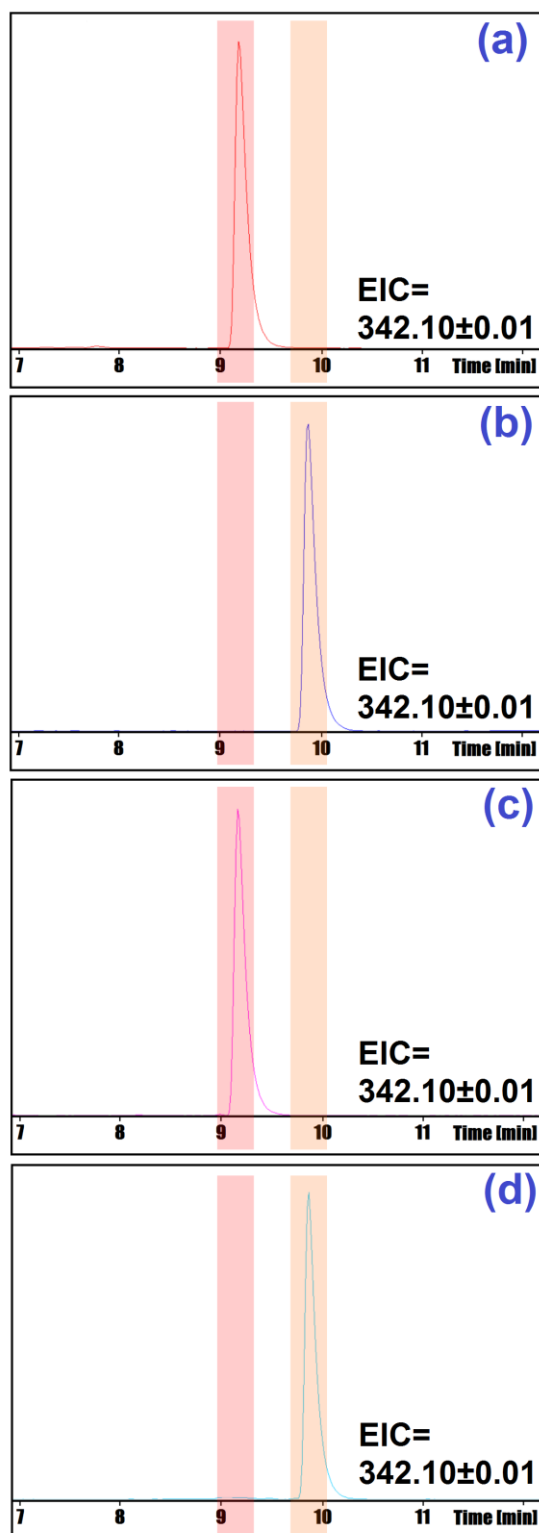

Marfey's analysis to determine the alanine configurations in **12a** and **12b**. The retention times of DNPA (2,4-dinitrophenyl-5-L-alaninamide)-standard L-Ala and DNPA-standard D-Ala were 9.1 min (a) and 9.9 min (b), respectively. Based on the retention times of DNPA-**12a** Ala [9.1 min, (c)] and DNPA-**12b** Ala [9.9 min (d)], the configurations of alanine in **12a** and **12b** were determined as L and D, respectively.

## Supplementary Note 1.3

### Structure characterization data of compound **13**

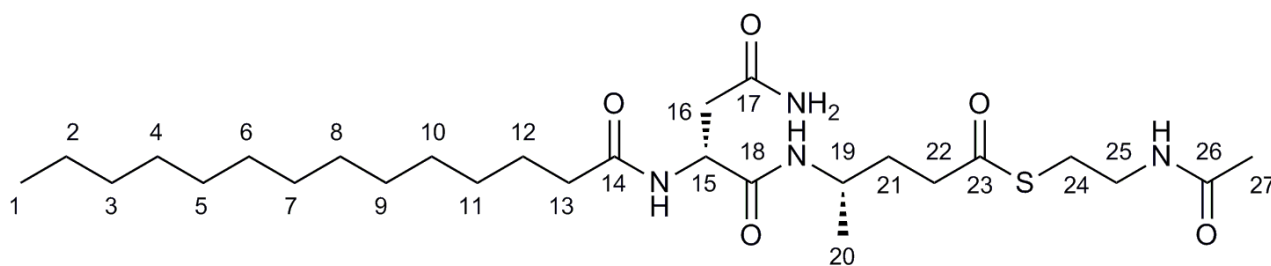

NMR spectroscopic data for **13** in DMSO-*d*<sub>6</sub>.

| C    | $\delta_C$                         | $\delta_H$ (J in Hz)                           | COSY                                   | HMBC ( $^1H$ to $^{13}C$ )       |
|------|------------------------------------|------------------------------------------------|----------------------------------------|----------------------------------|
| 1    | 14.1                               | 0.85 t (6.6)                                   | 2                                      | 2, 3                             |
| 2    | 22.6                               | 1.25 m                                         | 1                                      | 1, 3                             |
| 3    | 31.4                               | 1.23-1.25 m                                    |                                        |                                  |
| 4-10 | 28.8, 29.0, 29.1, 29.2, 29.2, 29.2 | 1.23-1.25 m                                    |                                        |                                  |
| 11   | 28.8                               | 1.23-1.25 m                                    |                                        |                                  |
| 12   | 25.4                               | 1.46 m                                         | 13a, 13b                               | 11, 13, 14                       |
| 13   | 35.4                               | a 2.08 m<br>b 2.08 m                           | 12, 13b<br>12, 13a                     | 11, 12, 14<br>11, 12, 14         |
| 14   | 172.3                              | -<br>NH, 7.92 d (8.4)                          | 15                                     | 14, 15, 16                       |
| 15   | 50.0                               | 4.44 m                                         | 14NH, 16a, 16b                         | 16, 18                           |
| 16   | 37.4                               | a 2.34 dd (8.4, 15.6)<br>b 2.43 dd (6.0, 15.0) | 15, 16b<br>15, 16a                     | 15, 17<br>15, 17                 |
| 17   | 171.5                              | -<br>a NH, 6.83 s<br>b NH, 7.26 s              | 17bNH<br>17aNH                         | 16, 17<br>17                     |
| 18   | 170.6                              | -<br>NH, 7.55 d (8.4)                          | 19                                     | 18, 19, 20, 21                   |
| 19   | 43.8                               | 3.73 m                                         | 18NH, 20, 21                           | 18, 20, 21, 22                   |
| 20   | 20.5                               | 1.01 d (6.6)                                   | 19                                     | 19, 21                           |
| 21   | 31.6                               | a 1.63 m<br>b 1.67 m                           | 19, 21b, 22a, 22b<br>19, 21a, 22a, 22b | 19, 20, 22, 23<br>19, 20, 22, 23 |
| 22   | 40.5                               | a 2.54 m<br>b 2.57 m                           | 21a, 21b, 22b<br>21a, 21b, 22a         | 19, 21, 23<br>19, 21, 23         |
| 23   | 198.5                              | -                                              |                                        |                                  |

|    |       |                          |                                               |                  |
|----|-------|--------------------------|-----------------------------------------------|------------------|
| 24 | 28.1  | a 2.87 m<br>b 2.88 m     | 24b, 25a, 25b<br>24a, 25a, 25b                | 23, 25<br>23, 25 |
| 25 | 38.4  | a 3.13 m<br><br>b 3.16 m | 24a, 24b,<br>25b, 25NH<br>24a, 24b, 25a, 25NH | 24, 26<br>24, 26 |
|    |       | NH, 8.04 t (5.4)         | 25a, 25b                                      | 25, 26           |
| 26 | 169.4 | -                        |                                               |                  |
| 27 | 22.2  | 1.78 s                   |                                               | 24, 25, 26       |

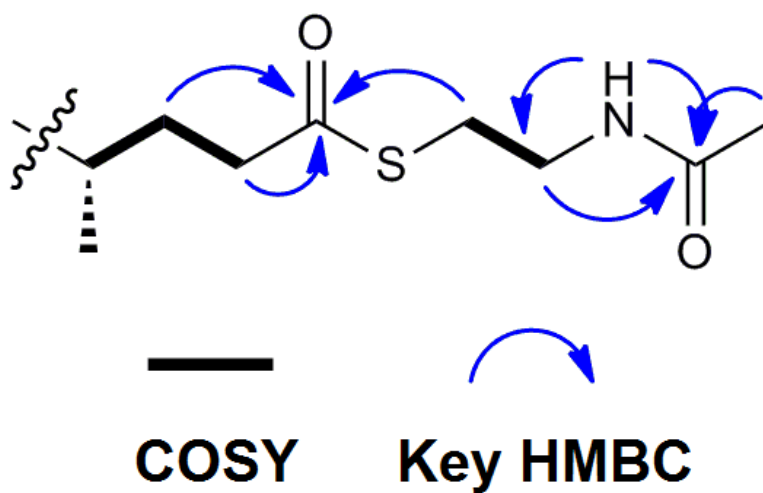

The NMR-based key correlations for the structural assignment of **13**.

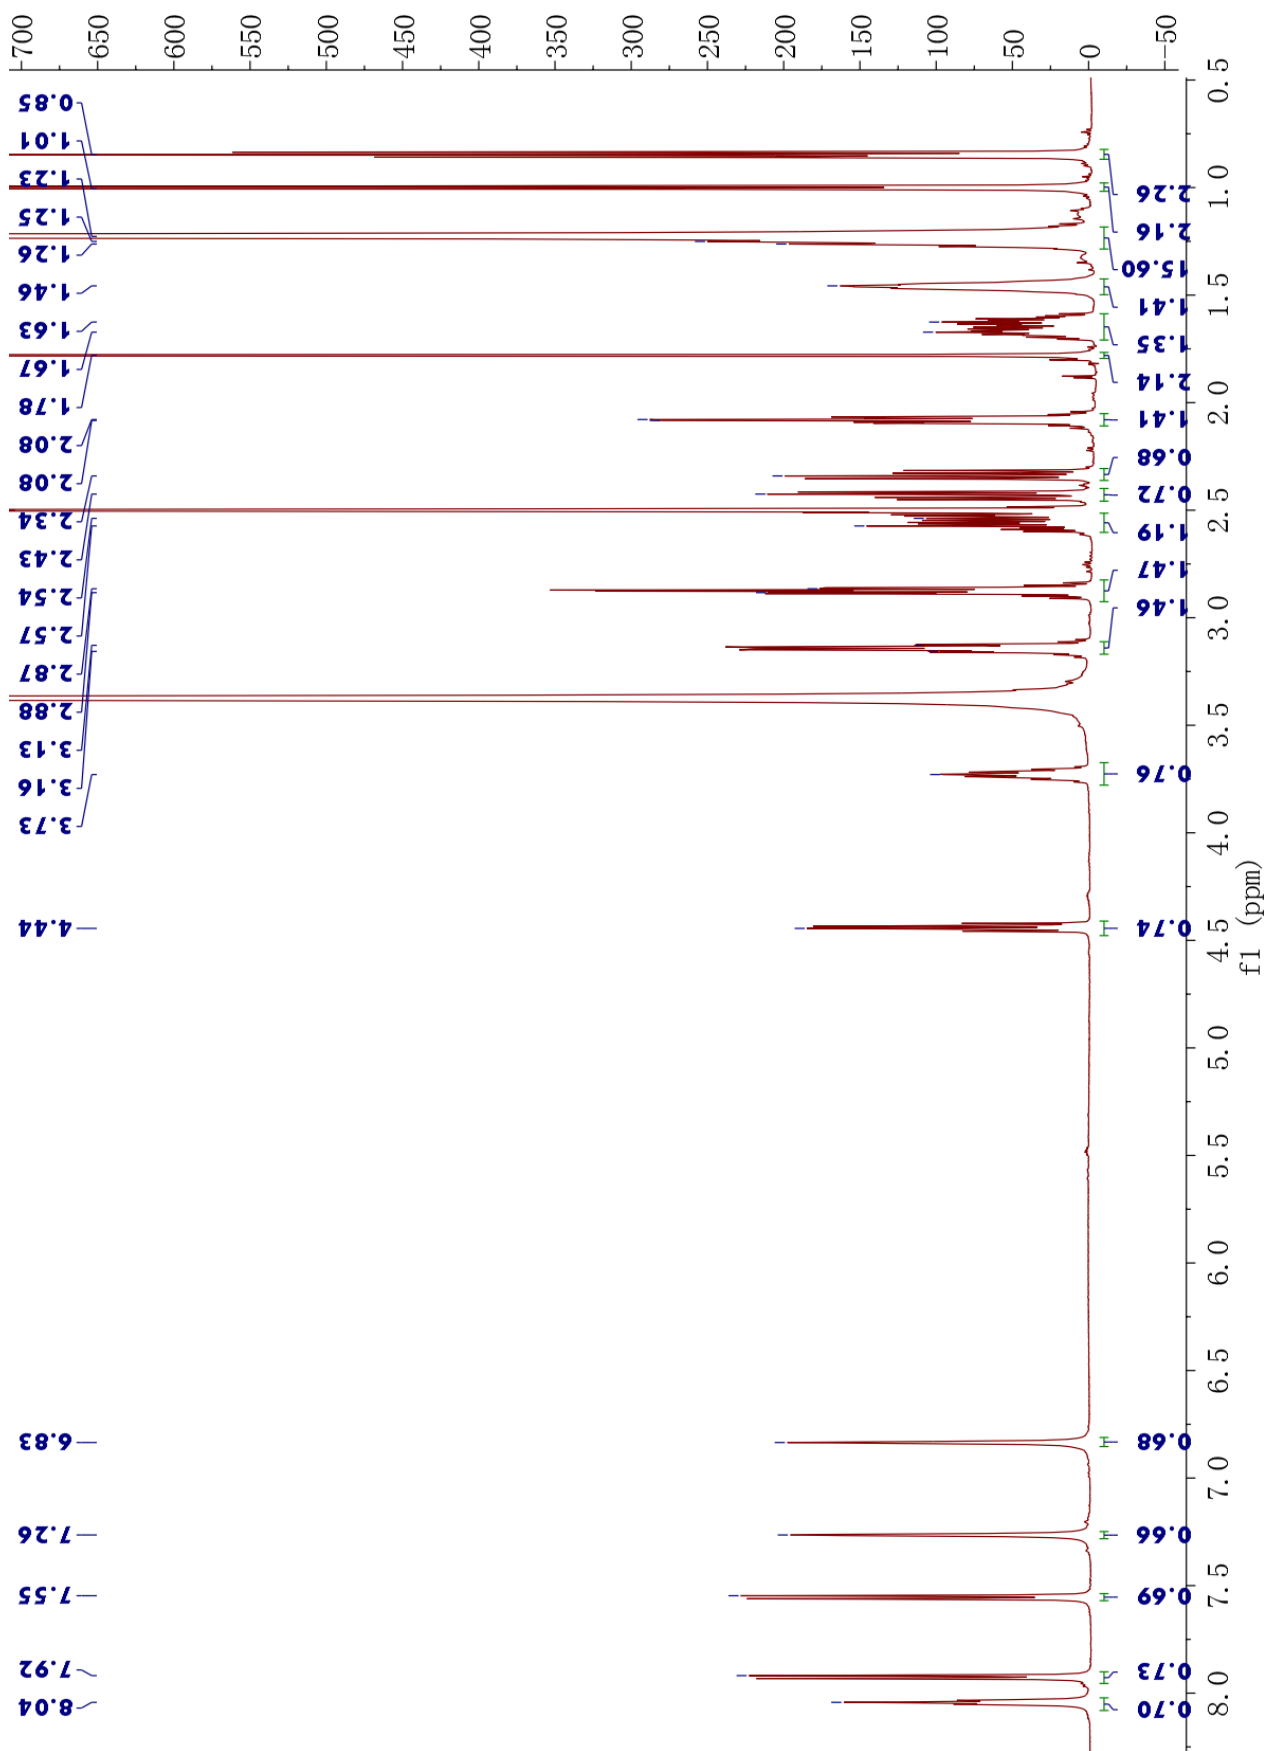

$^1\text{H}$  NMR spectrum of **13** (recorded in  $\text{DMSO}-d_6$  at 600 MHz).



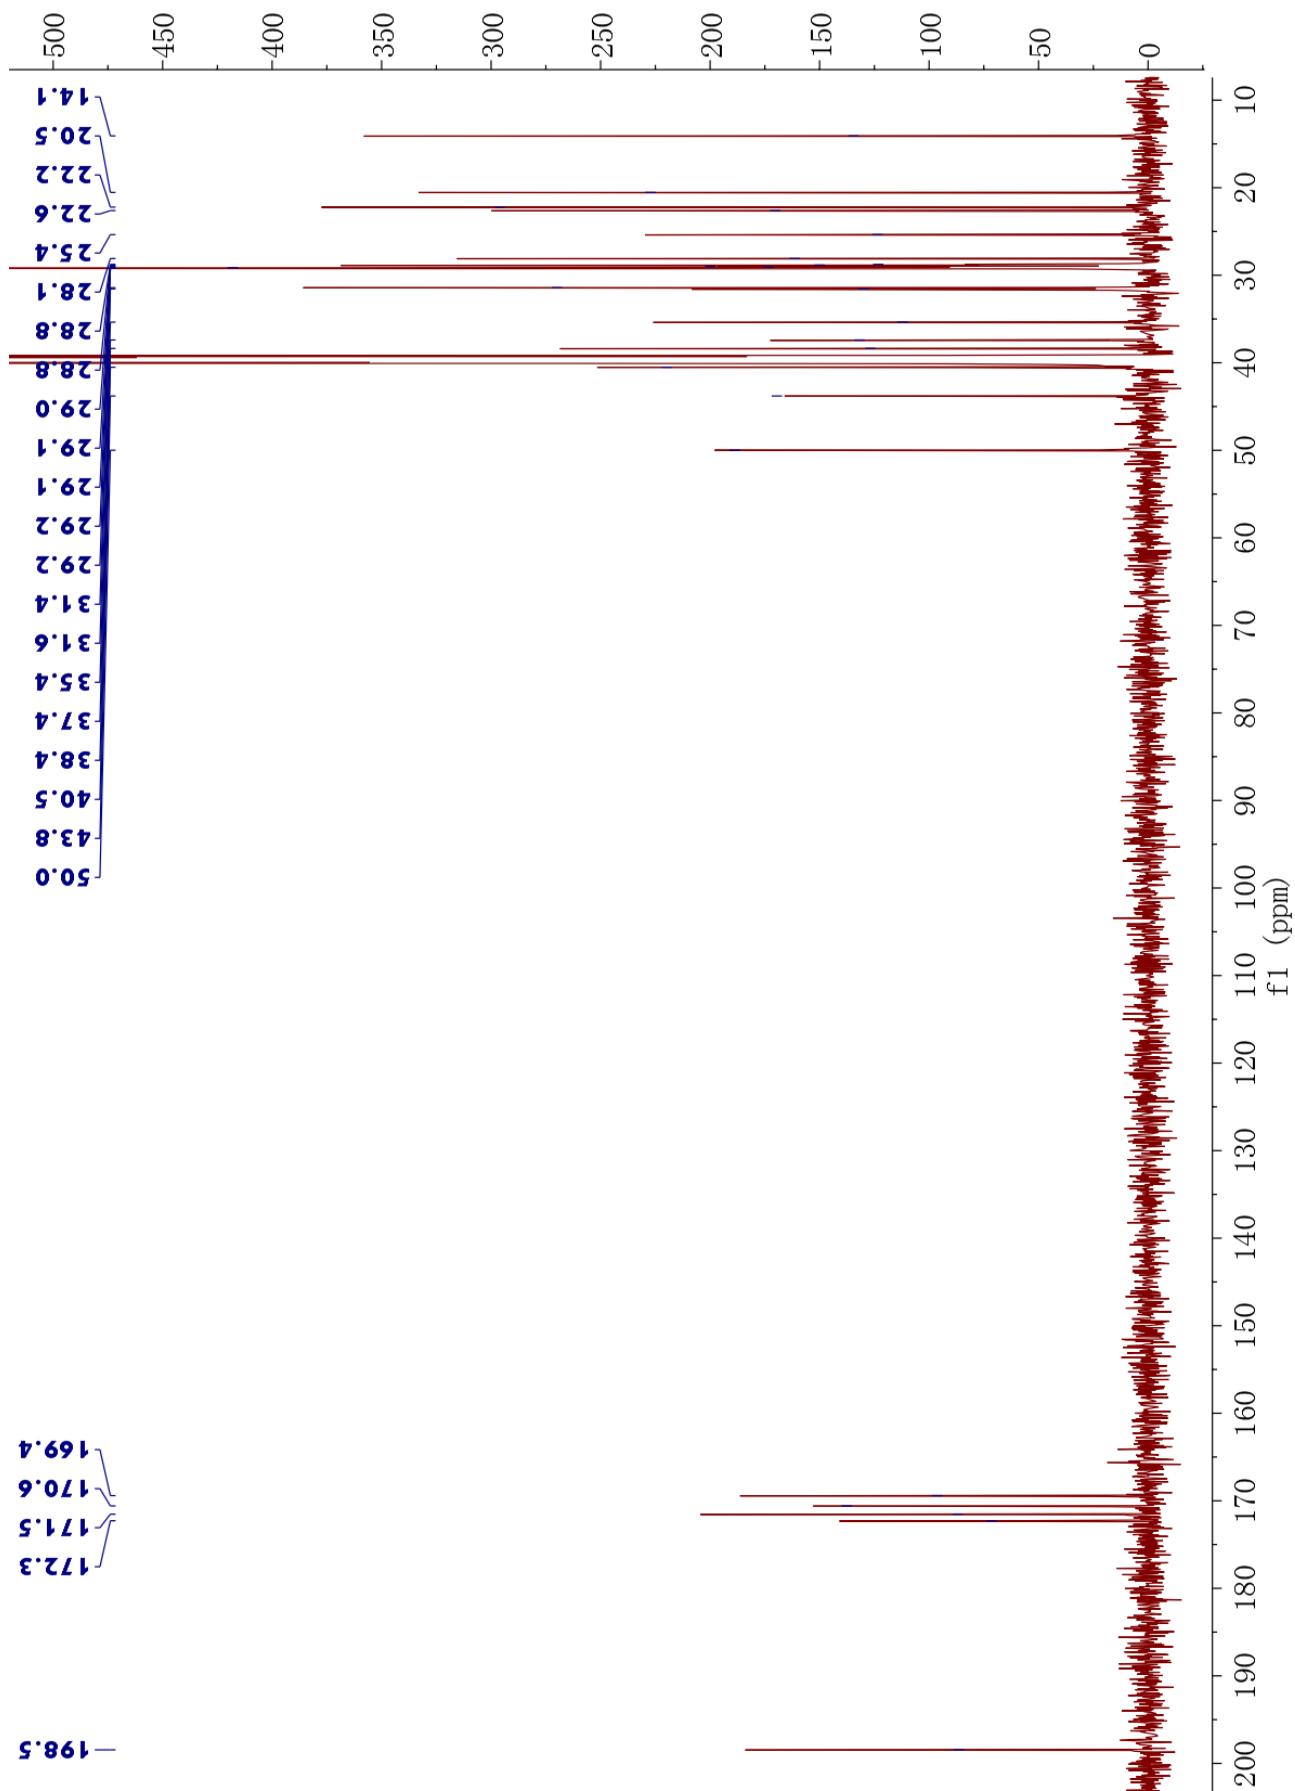

<sup>13</sup>C NMR spectrum of **13** (recorded in DMSO-*d*<sub>6</sub> at 150 MHz).

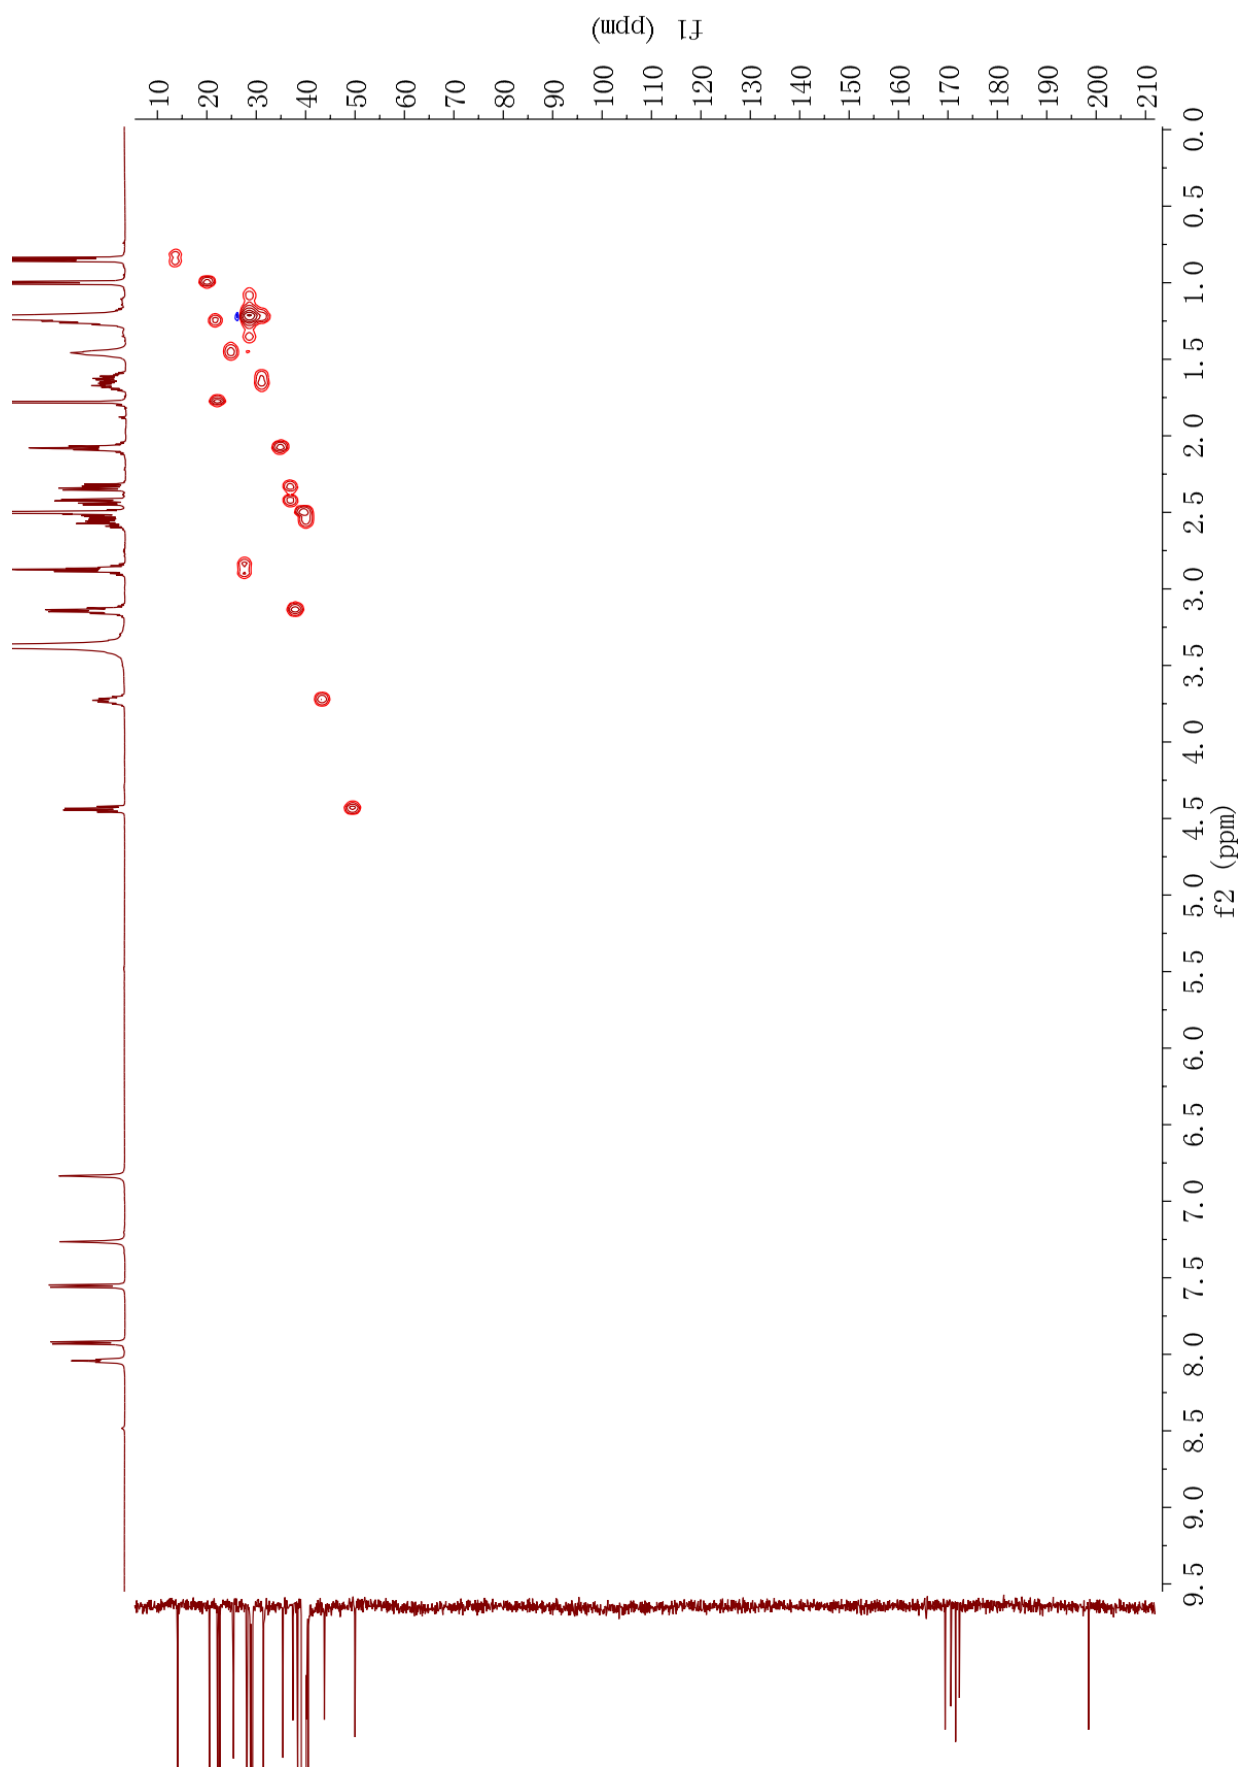

$^1\text{H}$ - $^{13}\text{C}$  HSQC spectrum of **13** (recorded in  $\text{DMSO-}d_6$  at 600 MHz).

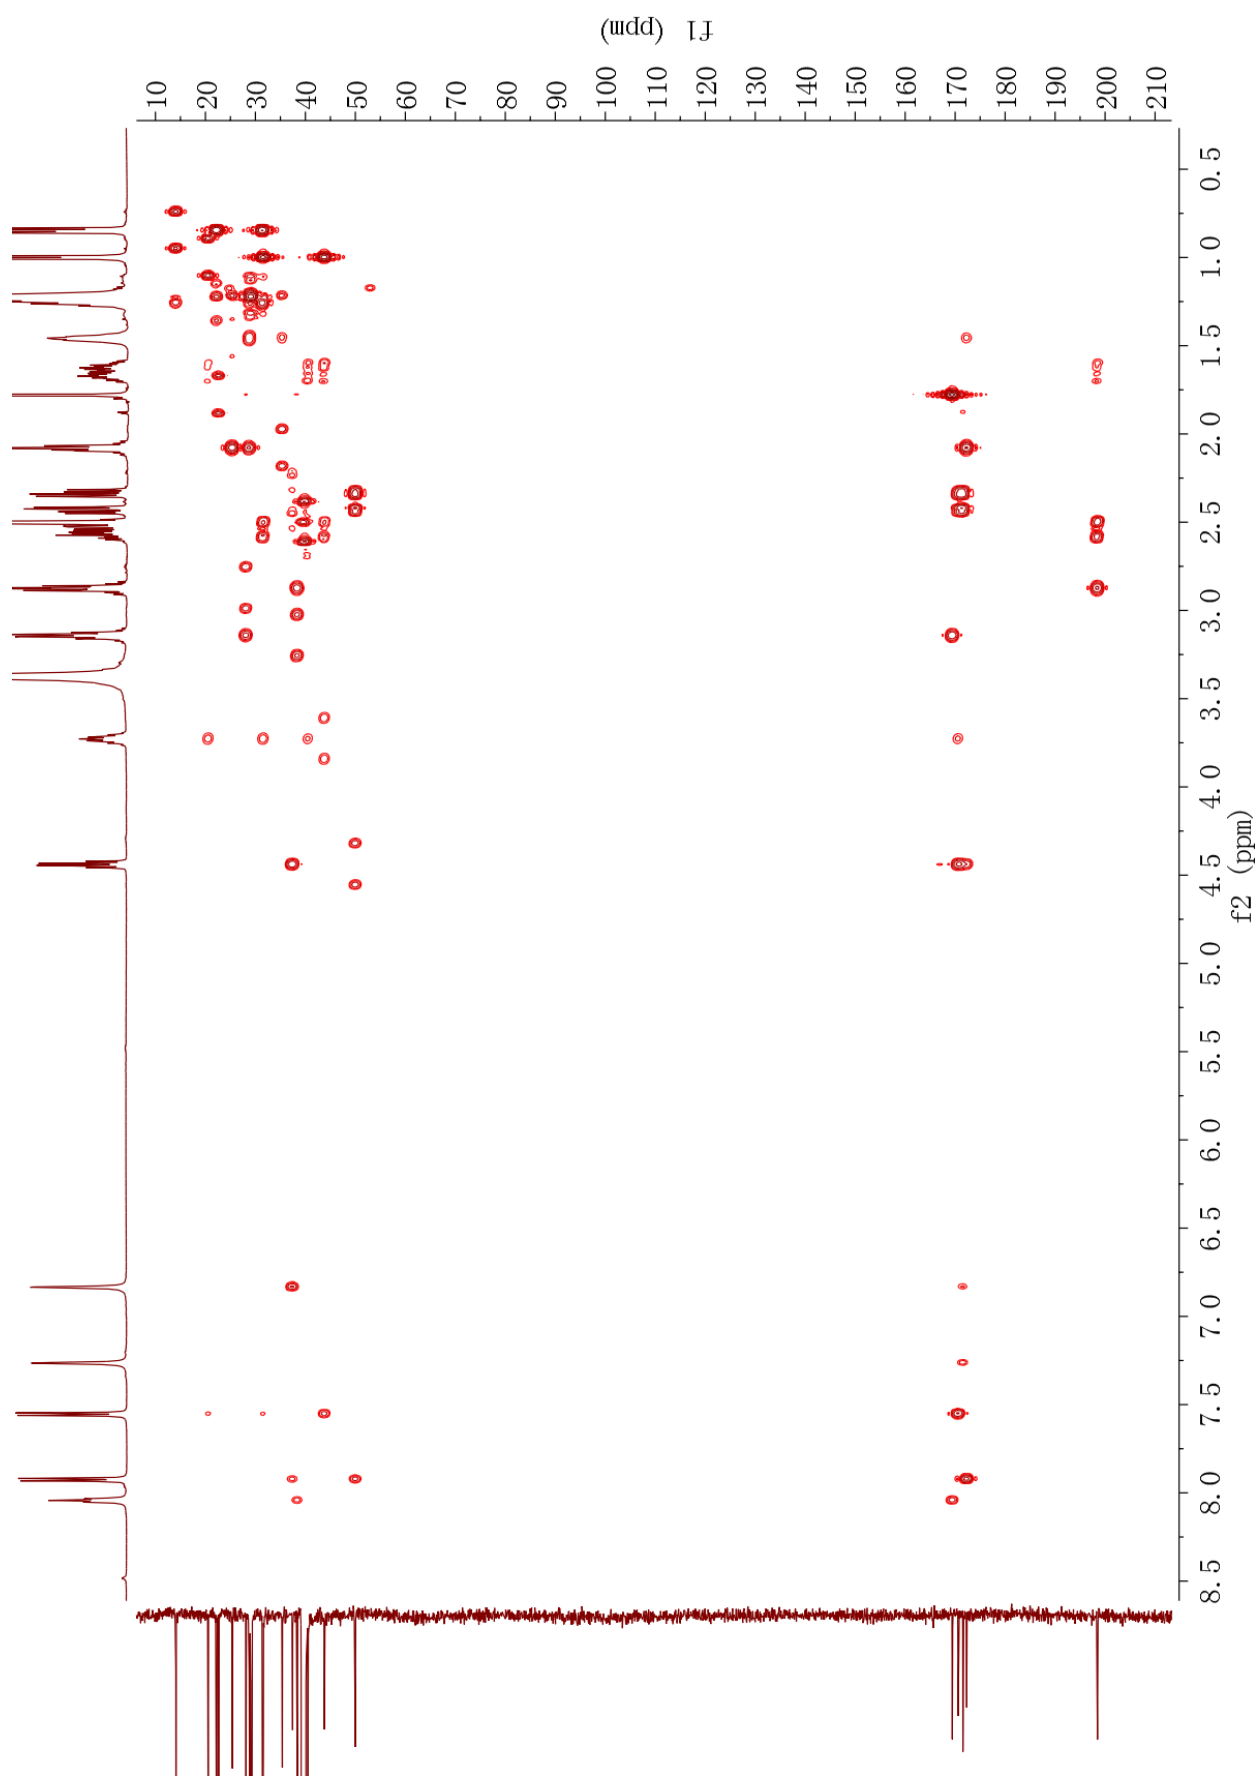

$^1\text{H}$ - $^{13}\text{C}$  HMBC spectrum of **13** (recorded in  $\text{DMSO}-d_6$  at 600 MHz).

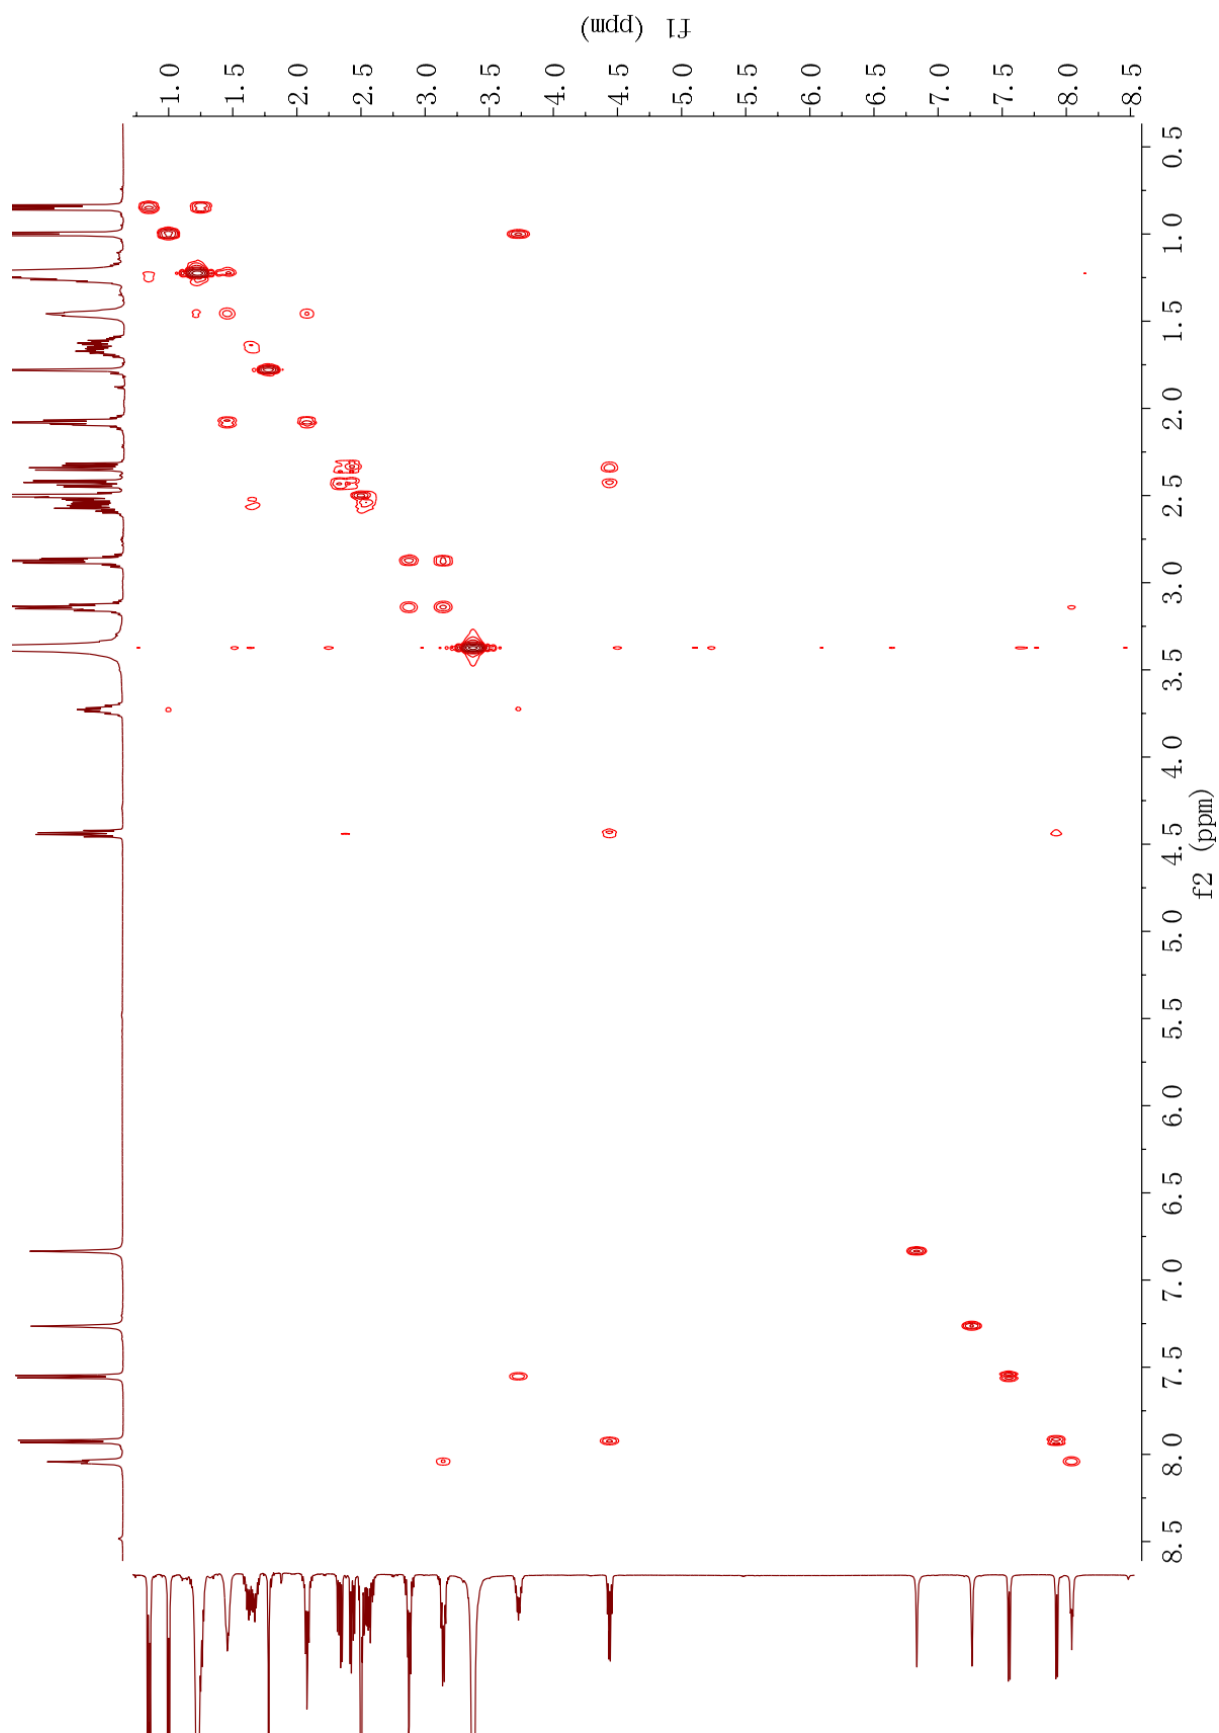

$^1\text{H}$ - $^1\text{H}$  COSY spectrum of **13** (recorded in  $\text{DMSO-}d_6$  at 600 MHz).

## Supplementary Note 1.4

### Structure characterization data of compound **14**

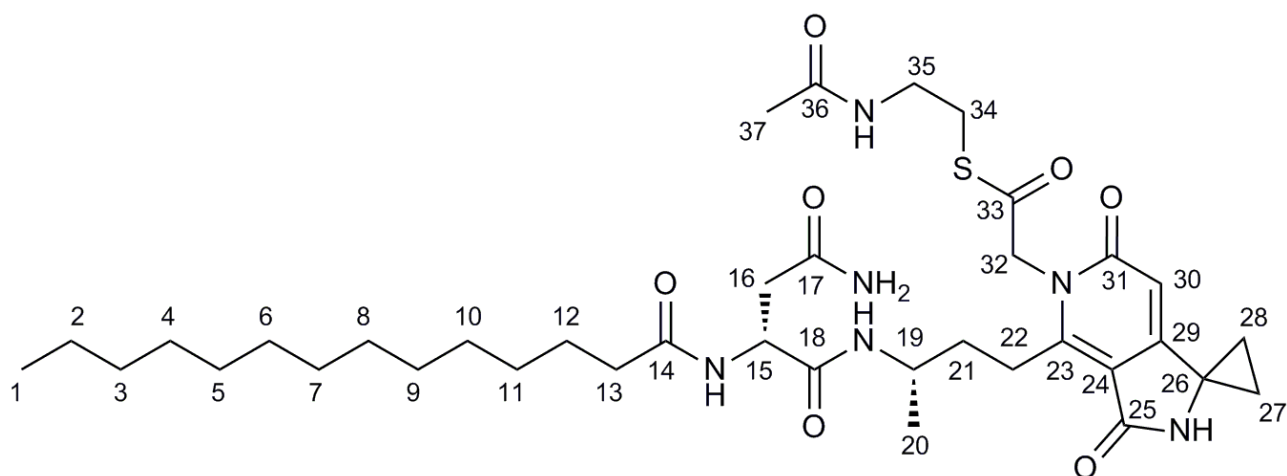

NMR spectroscopic data for **14** in DMSO-*d*<sub>6</sub>.

| C    | $\delta_C$                                     | $\delta_H$ (J in Hz)              | COSY                  | HMBC ( $^1H$ to $^{13}C$ ) |
|------|------------------------------------------------|-----------------------------------|-----------------------|----------------------------|
| 1    | 14.1                                           | 0.84 t (6.6)                      | 2                     | 2, 3                       |
| 2    | 22.2                                           | 1.26 m                            | 1                     | 1, 3                       |
| 3    | 31.4                                           | 1.18-1.26 m                       |                       |                            |
| 4-10 | 28.7, 29.0, 29.1,<br>29.1, 29.2, 29.2,<br>29.2 | 1.18-1.26 m                       |                       |                            |
| 11   | 28.8                                           | 1.18-1.26 m                       | 12                    |                            |
| 12   | 25.3                                           | 1.45 m                            | 11, 13a, 13b          |                            |
| 13   | 35.3                                           | a 2.10 m<br>b 2.11 m              | 12, 13b<br>12, 13a    | 11, 12, 14<br>11, 12, 14   |
| 14   | 172.4                                          | -<br>NH, 7.90 d (7.2)             | 15                    | 14, 15, 16                 |
| 15   | 50.2                                           | 4.46 m                            | 14NH, 16a,<br>16b     | 16, 18                     |
| 16   | 37.5                                           | a 2.38 m<br>b 2.45 m              | 15, 16b<br>15, 16a    | 15, 17<br>15, 17           |
| 17   | 171.6                                          | -<br>a NH, 6.83 s<br>b NH, 7.28 s | 17bNH<br>17aNH        | 16, 17<br>17               |
| 18   | 170.7                                          | -<br>NH, 7.72 d (7.8)             | 19                    | 18, 19, 20, 21             |
| 19   | 44.7                                           | 3.82 m                            | 18NH, 20,<br>21a, 21b | 18, 20, 21, 22             |
| 20   | 20.4                                           | 1.05 d (6.6)                      | 19                    | 19, 21                     |
| 21   | 35.2                                           | a 1.54 m                          | 19, 21b, 22a,         | 19, 20, 22                 |

|    |       |                  |               |                    |
|----|-------|------------------|---------------|--------------------|
|    |       |                  | 22b           |                    |
|    |       | b 1.59 m         | 19, 21a, 22a, | 19, 20, 22         |
|    |       |                  | 22b           |                    |
| 22 | 24.1  | a 3.03 m         | 21a, 21b, 22b |                    |
|    |       | b 3.25 m         | 21a, 21b, 22a |                    |
| 23 | 153.2 | -                |               |                    |
| 24 | 109.5 | -                |               |                    |
| 25 | 166.9 | -                |               |                    |
|    |       | NH, 8.48 s       |               | 23, 24, 25, 26, 29 |
| 26 | 40.1  | -                |               |                    |
| 27 | 15.3  | a 1.33 m         | 27b, 28a, 28b | 26, 28, 29         |
|    |       | b 1.38 m         | 27a, 28a, 28b | 26, 28, 29         |
| 28 | 15.3  | a 1.33 m         | 27a, 27b, 28b | 26, 27, 29         |
|    |       | b 1.38 m         | 27a, 27b, 28a | 26, 27, 29         |
| 29 | 159.9 | -                |               |                    |
| 30 | 103.1 | 6.10 s           |               | 23, 24, 26, 31     |
| 31 | 161.9 | -                |               |                    |
| 32 | 52.9  | a 4.97 d (16.8)  |               | 23, 31, 33         |
|    |       | b 4.99 d (16.8)  |               | 23, 31, 33         |
| 33 | 194.6 | -                |               |                    |
| 34 | 28.2  | a 2.94 m         | 34b, 35a, 35b | 33, 35             |
|    |       | b 2.97 m         | 34a, 35a, 35b | 33, 35             |
| 35 | 38.1  | a 3.16 m         | 34a, 34b,     | 34, 36             |
|    |       |                  | 35b, 35NH     |                    |
|    |       | b 3.21 m         | 34a, 34b,     | 34, 36             |
|    |       |                  | 35a, 35NH     |                    |
|    |       | NH, 8.06 t (5.4) | 35a, 35b      | 35, 36             |
| 36 | 169.6 | -                |               |                    |
| 37 | 22.6  | 1.79 s           |               | 36                 |

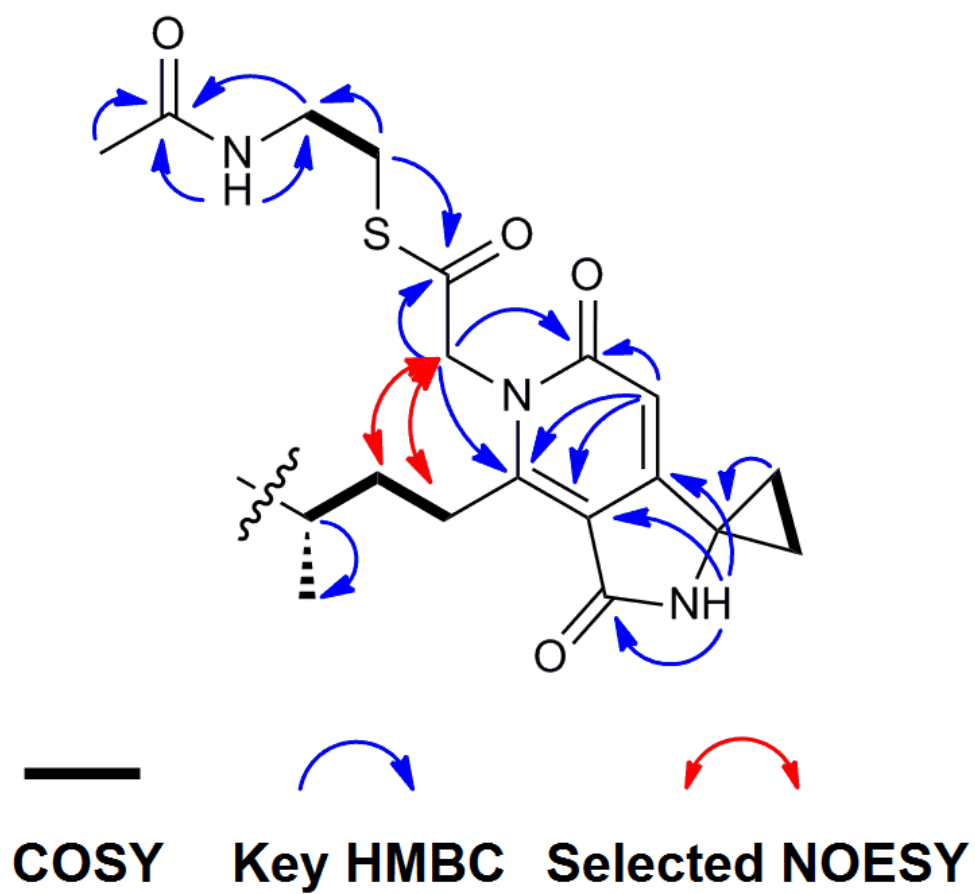

The NMR-based key correlations for the structural assignment of **14**.

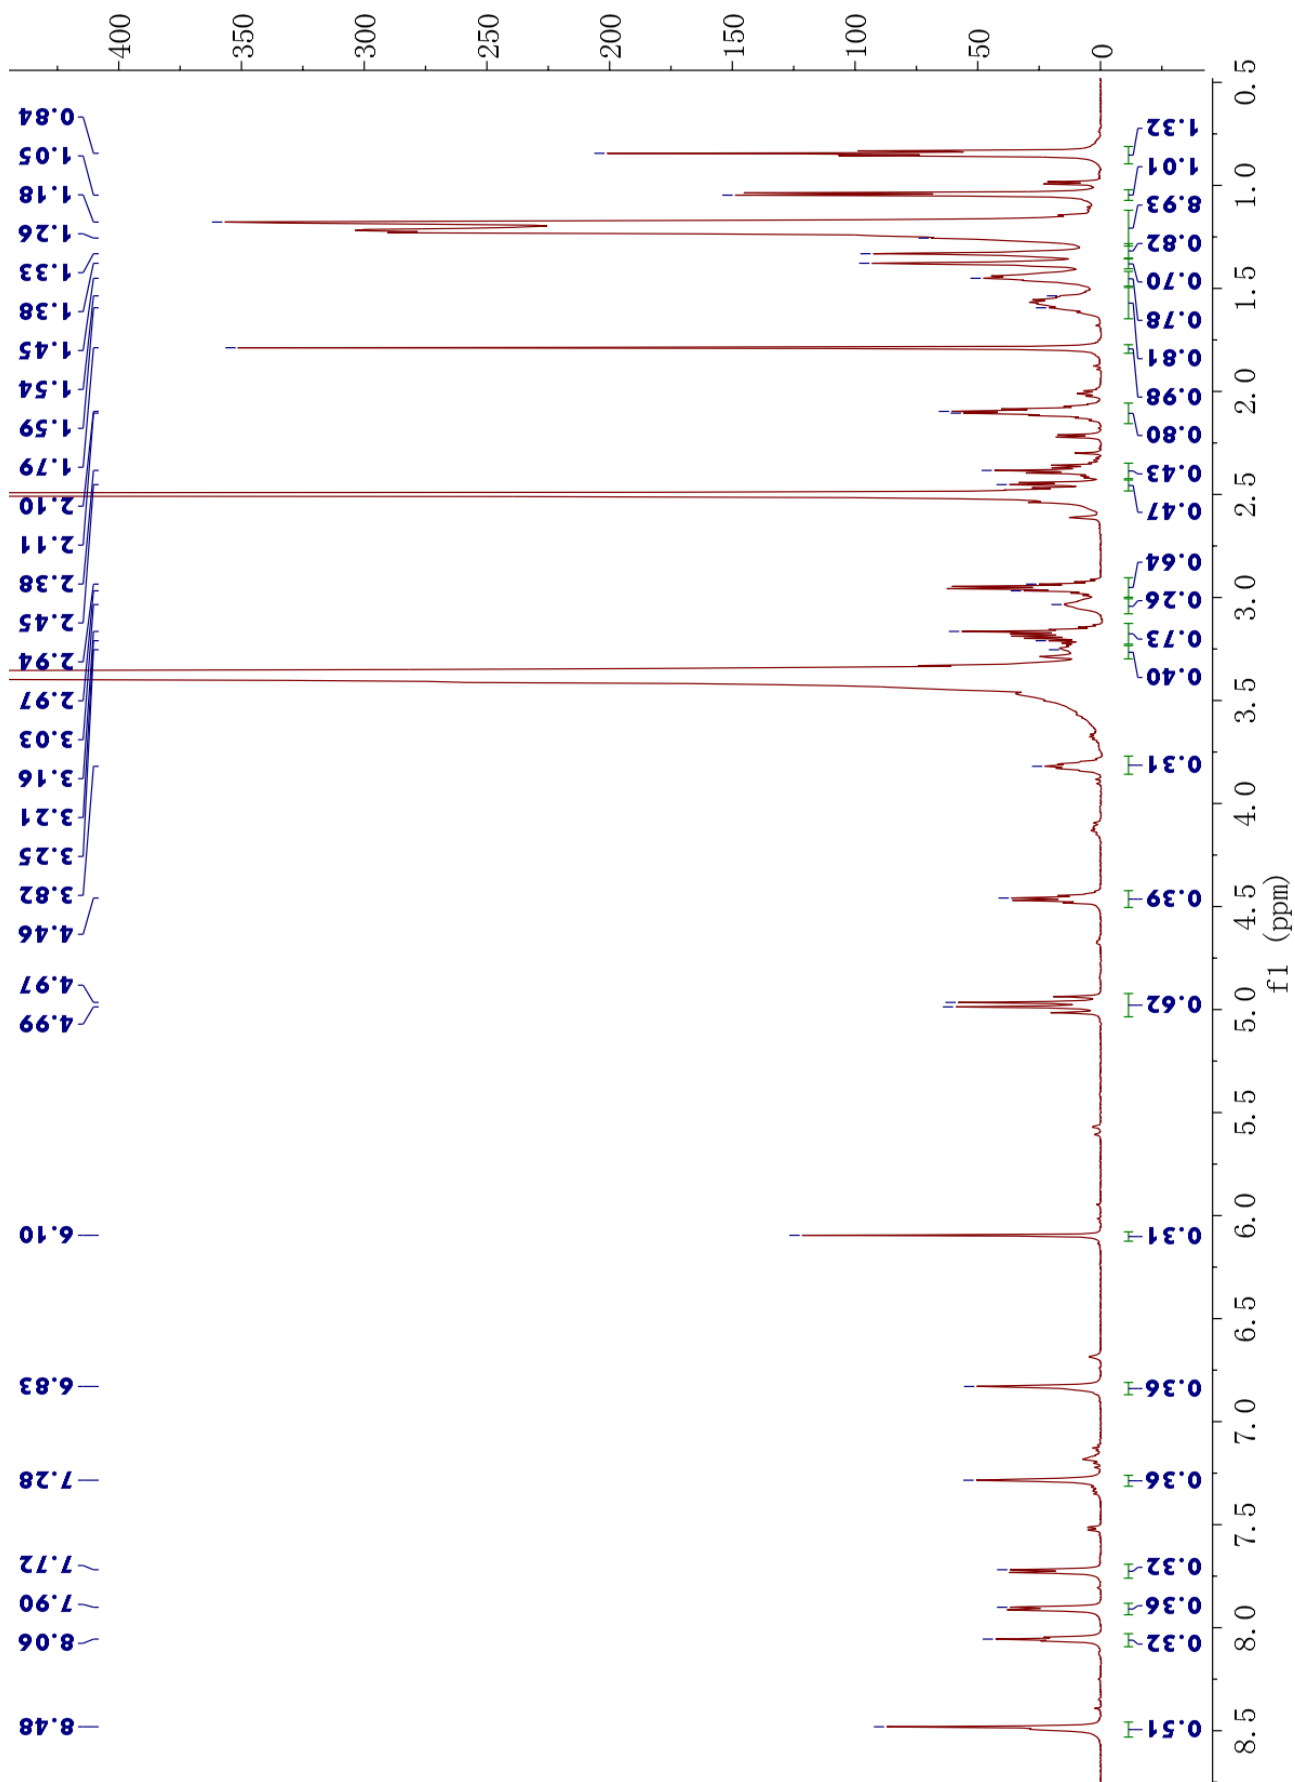

$^1\text{H}$  NMR spectrum of **14** (recorded in  $\text{DMSO-}d_6$  at 600 MHz).



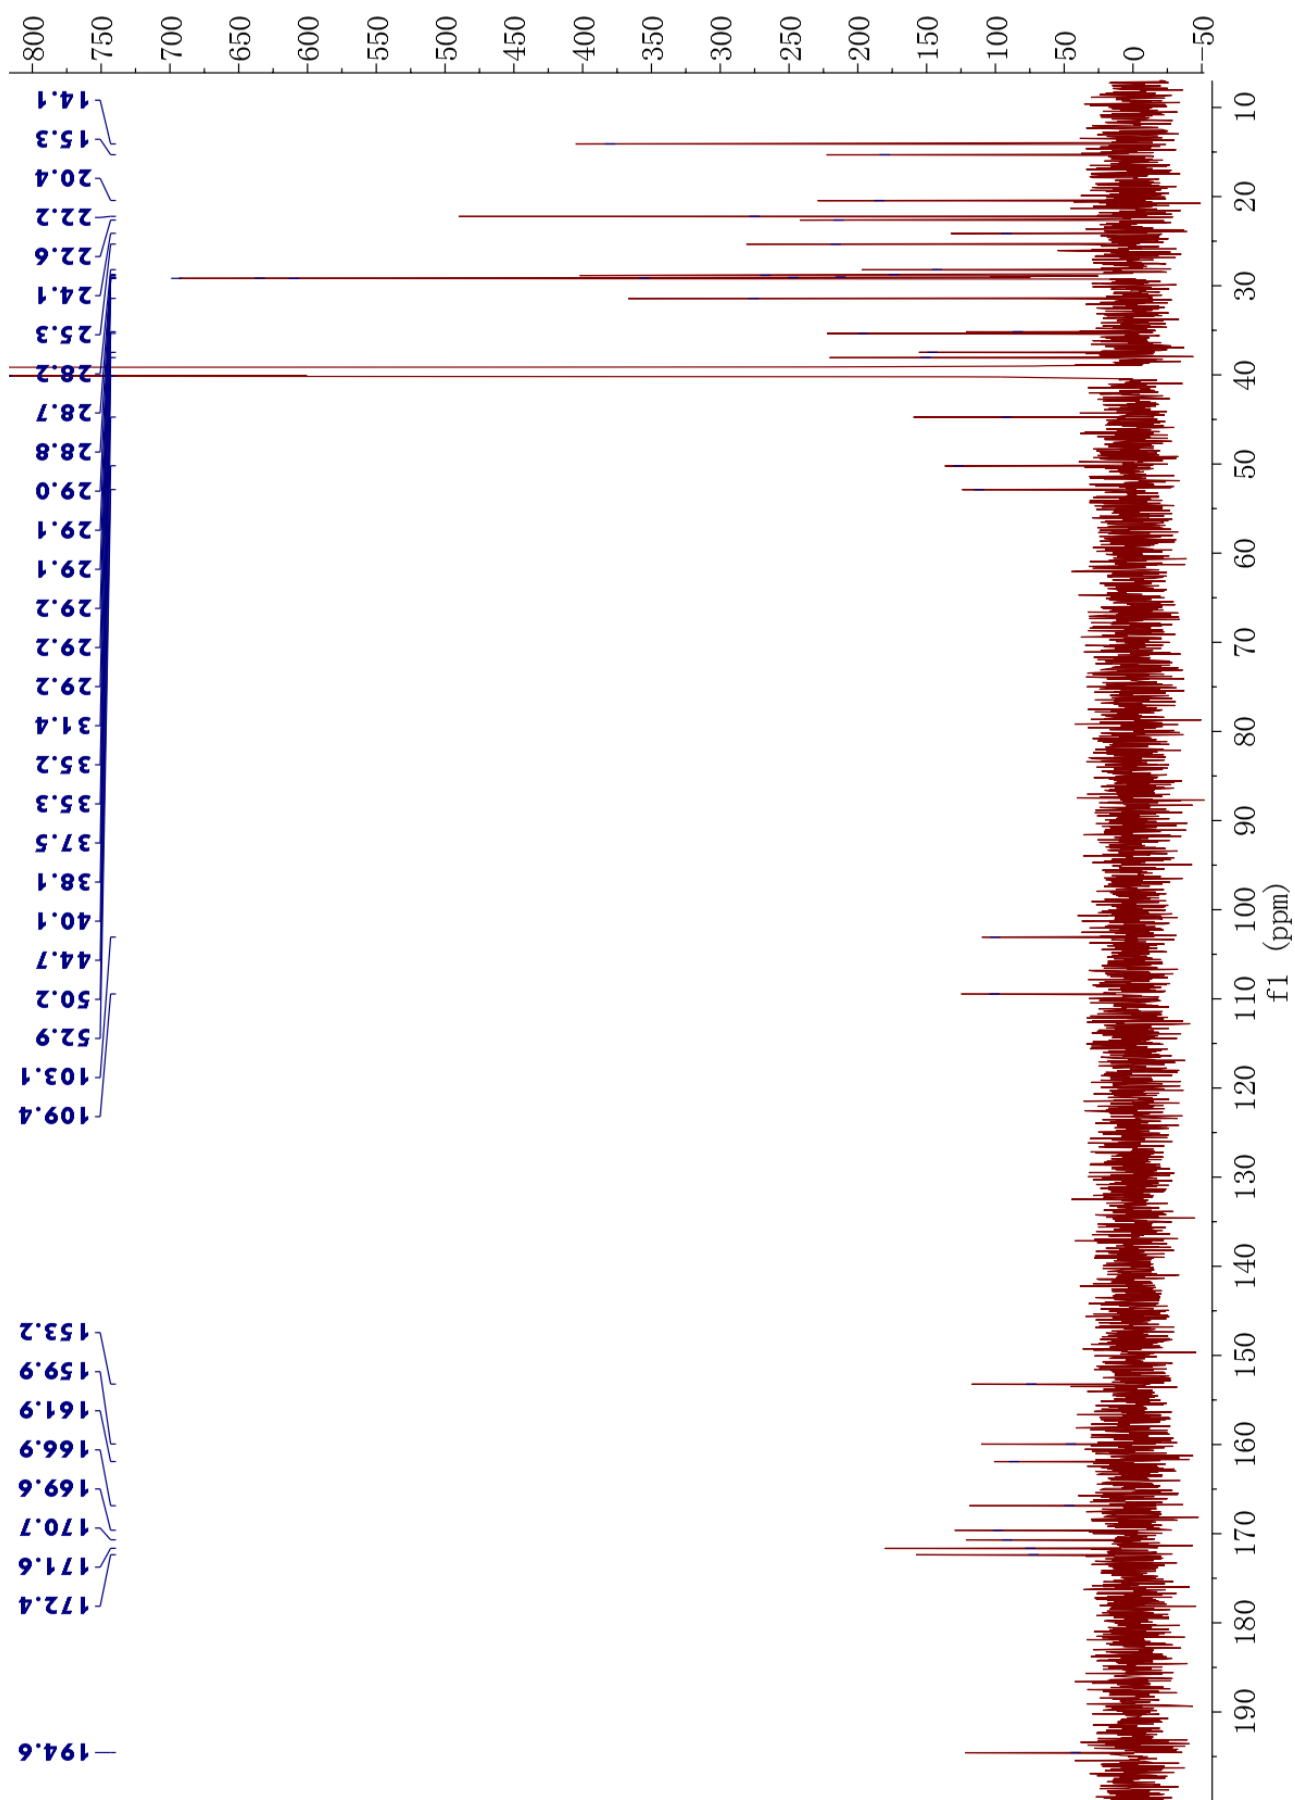

$^{13}\text{C}$  NMR spectrum of **14** (recorded in  $\text{DMSO-}d_6$  at 150 MHz).

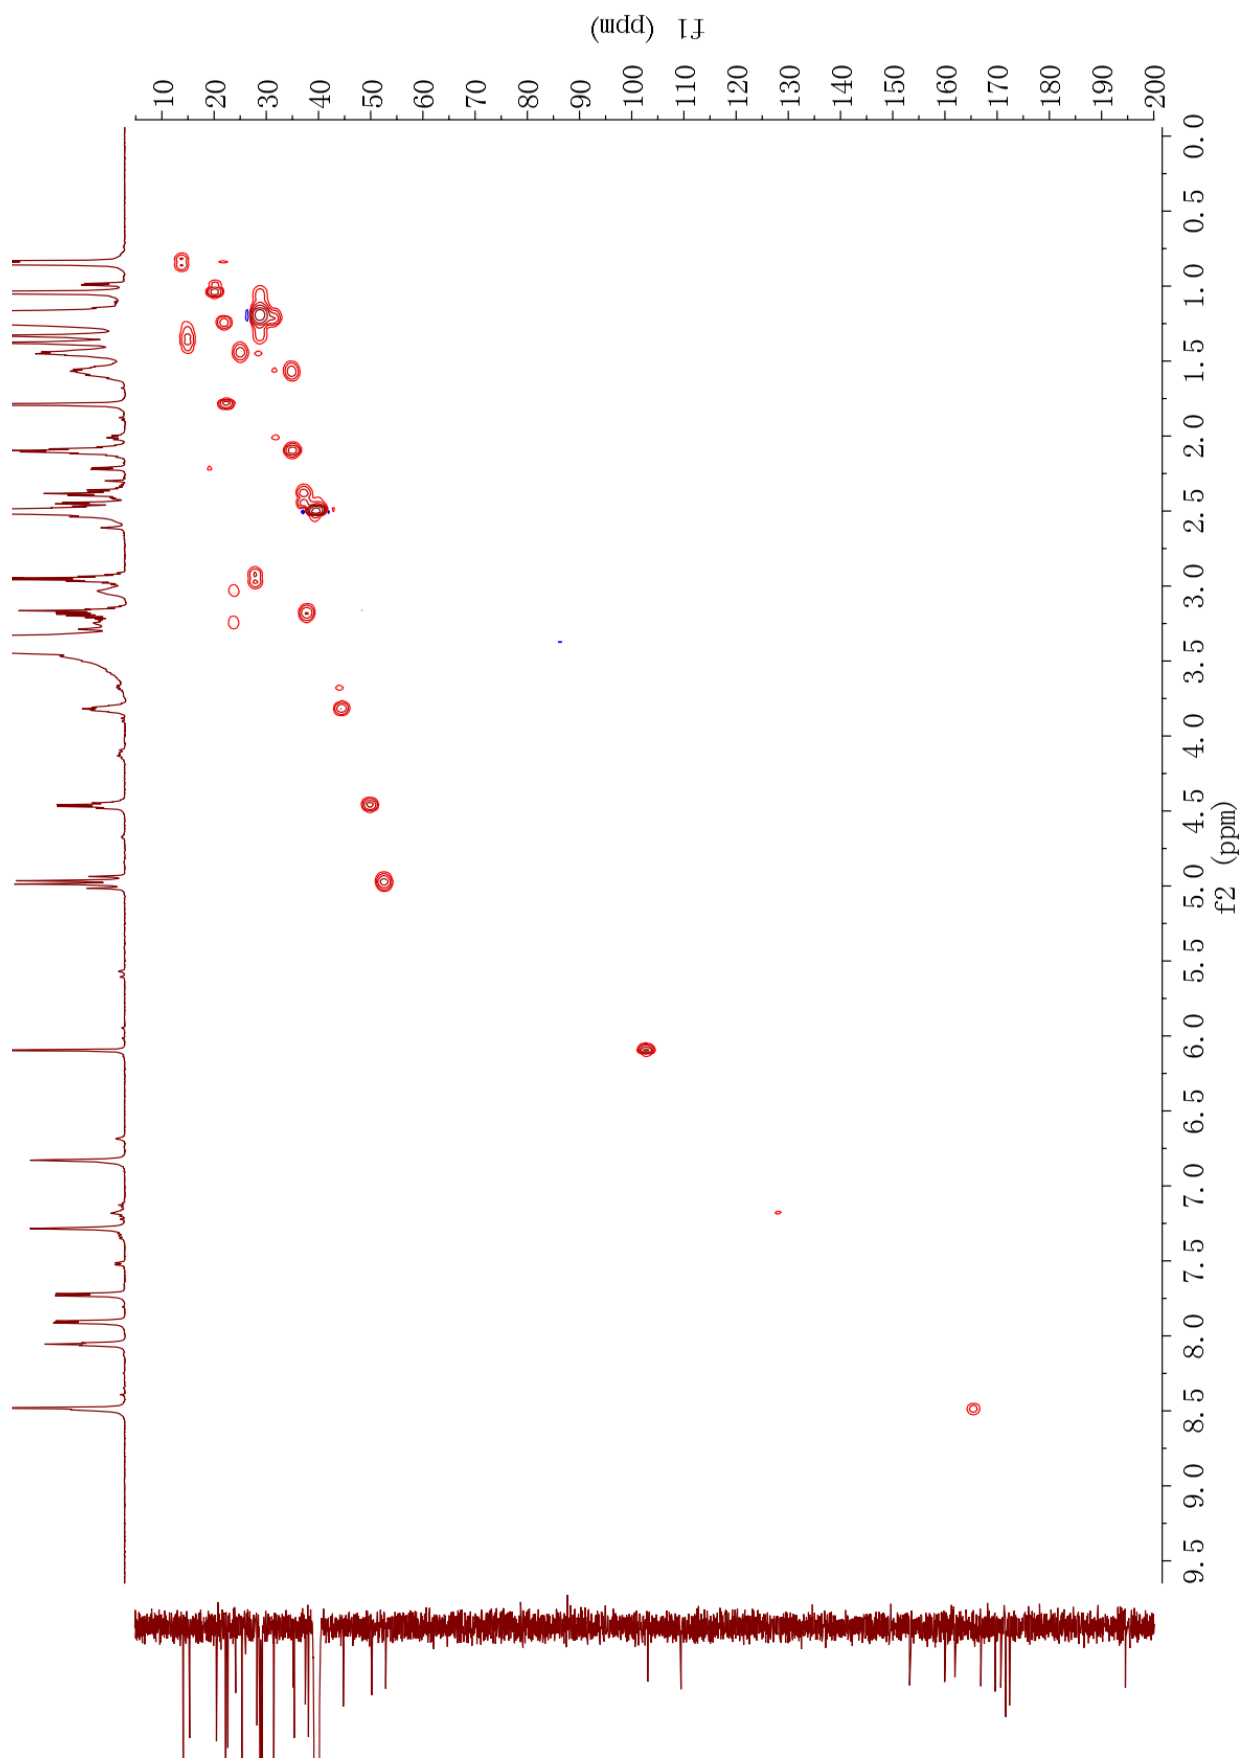

$^1\text{H}$ - $^{13}\text{C}$  HSQC spectrum of **14** (recorded in  $\text{DMSO}-d_6$  at 600 MHz).

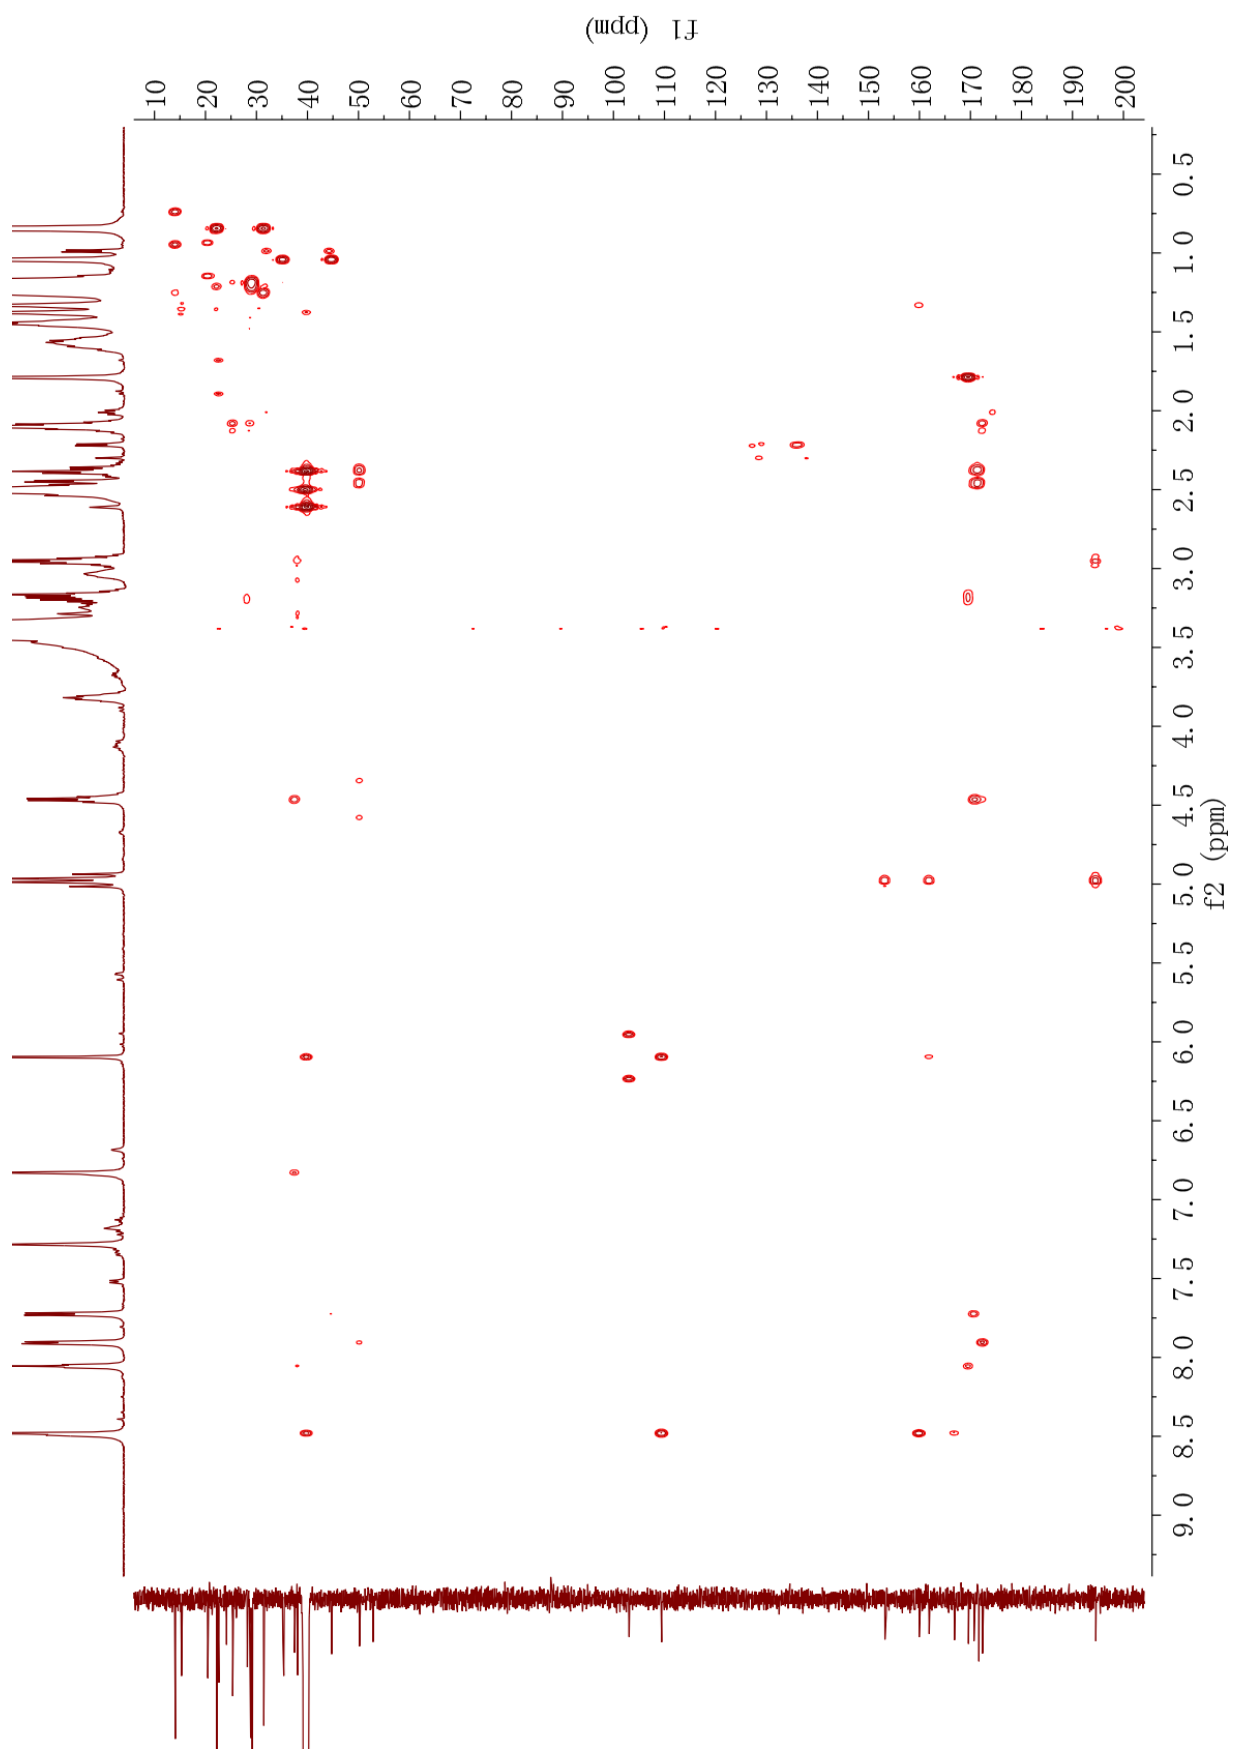

$^1\text{H}$ - $^{13}\text{C}$  HMBC spectrum of **14** (recorded in  $\text{DMSO-}d_6$  at 600 MHz).

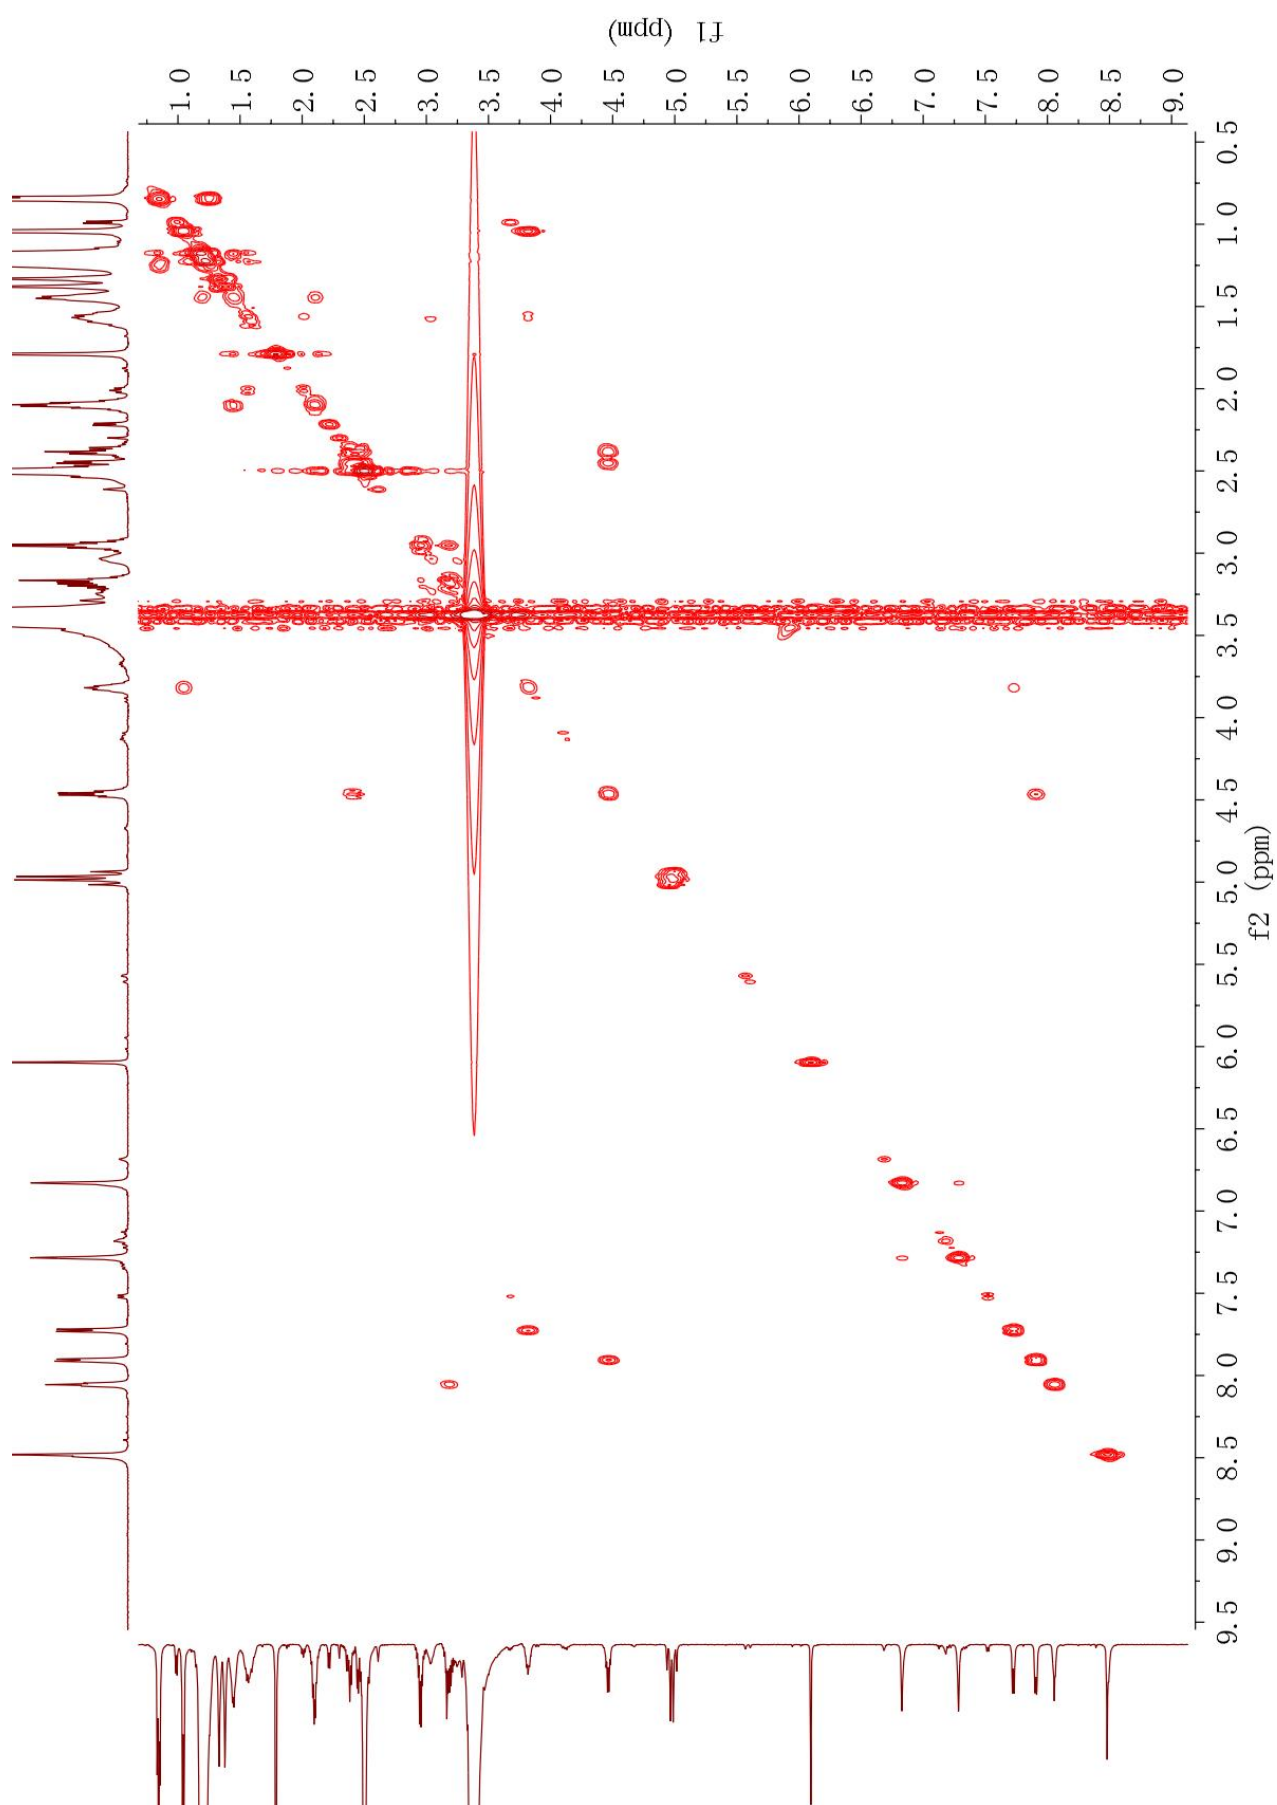

$^1\text{H}$ - $^1\text{H}$  COSY spectrum of **14** (recorded in DMSO- $d_6$  at 600 MHz).

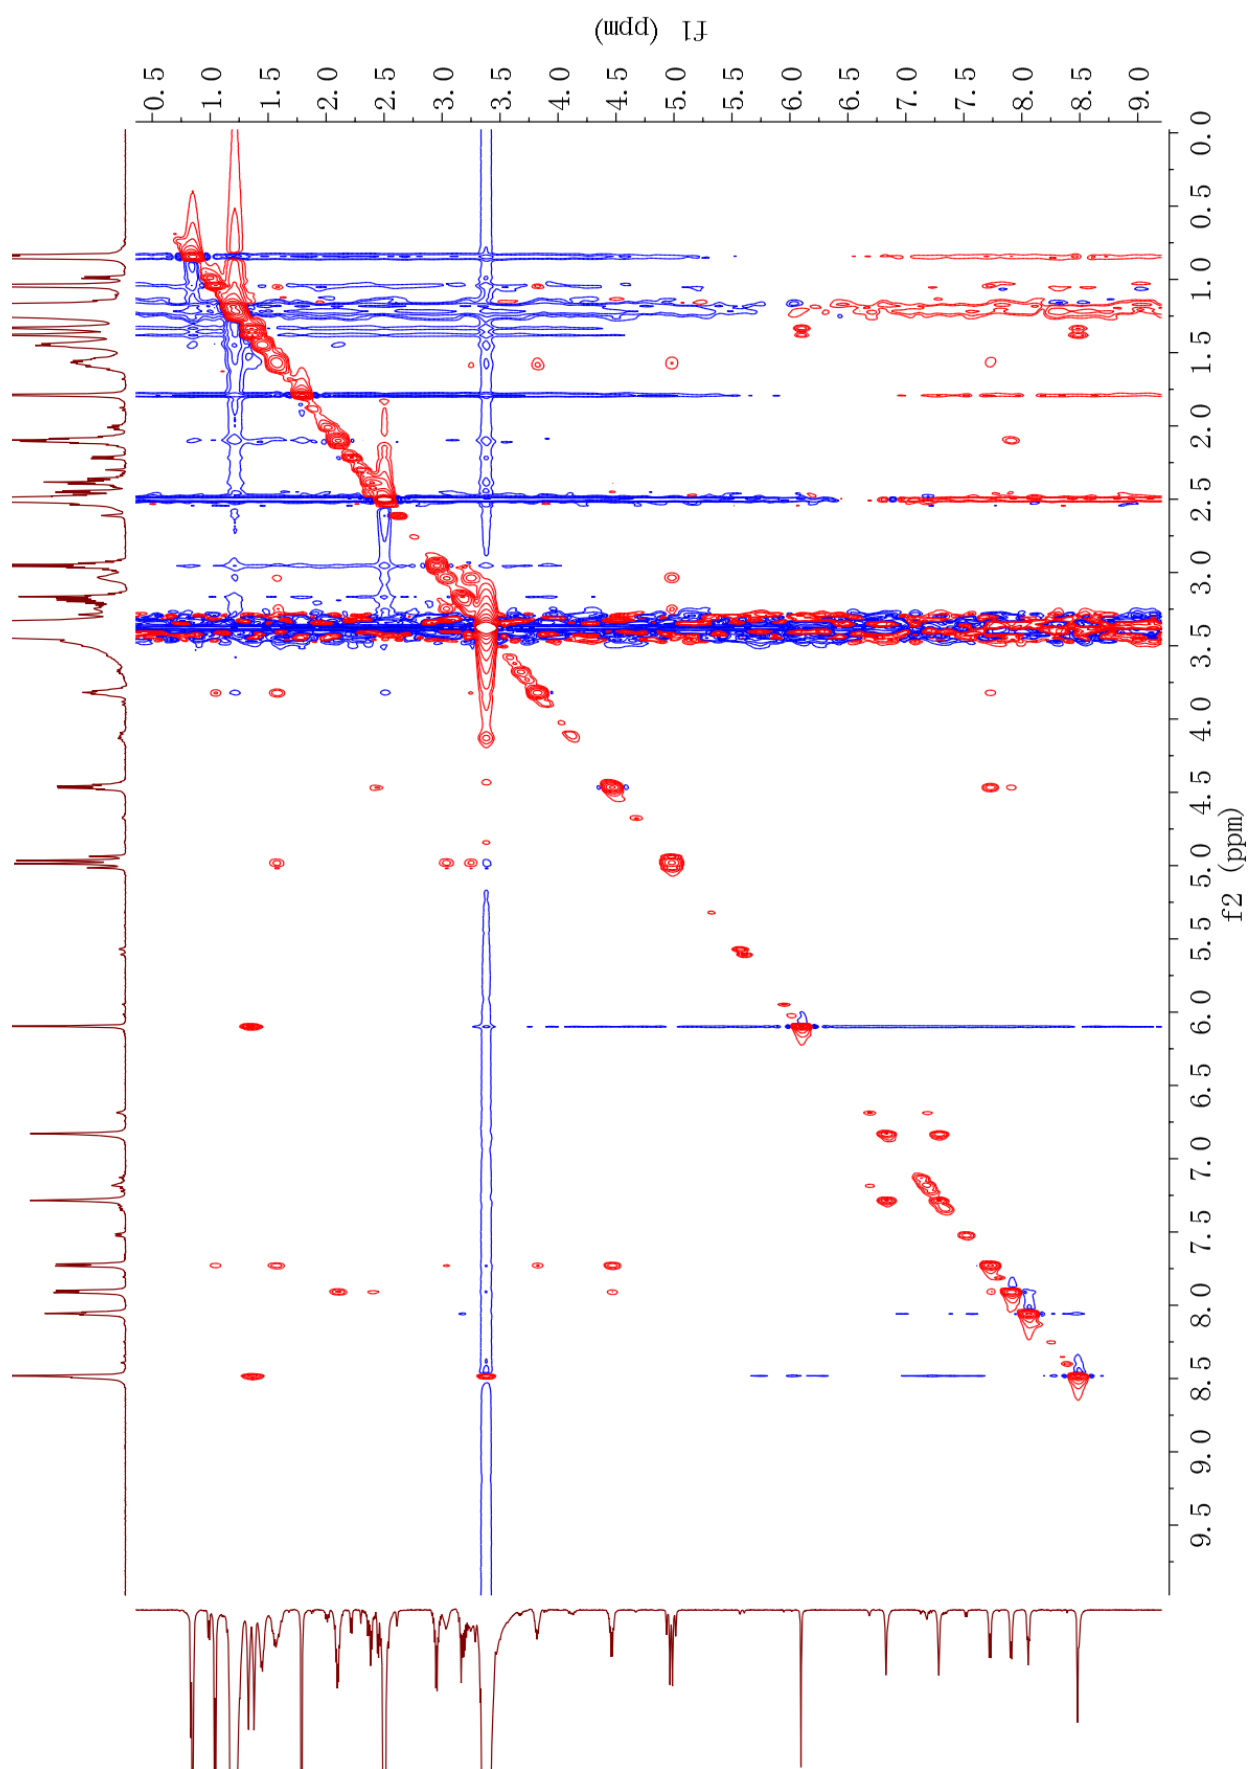

$^1\text{H}$ - $^1\text{H}$  NOESY spectrum of **14** (recorded in  $\text{DMSO}-d_6$  at 600 MHz).

## Supplementary Note 2

### Structure characterization data of compound **10**

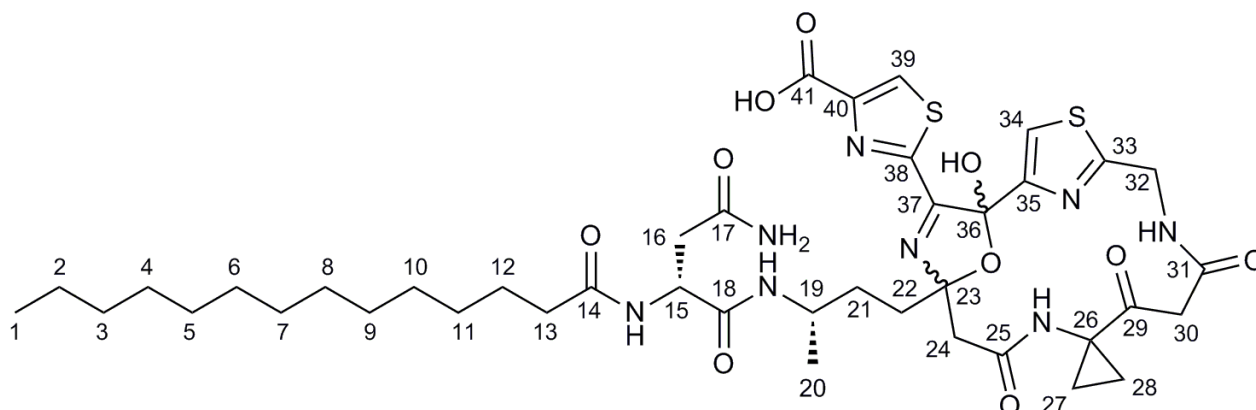

NMR spectroscopic data for **10** (**10a** and **10b** two stereoisomers) in DMSO-*d*<sub>6</sub>.

| C    | $\delta_C$                               | $\delta_H$ (J in Hz)                                        | COSY              | HMBC ( <sup>1</sup> H to <sup>13</sup> C) |
|------|------------------------------------------|-------------------------------------------------------------|-------------------|-------------------------------------------|
| 1    | 14.1                                     | 0.84 t (6.8)                                                | 2                 | 2, 3                                      |
| 2    | 22.3                                     | 1.25 m                                                      | 1                 | 1                                         |
| 3    | 31.5                                     | 1.14-1.27 m                                                 |                   |                                           |
| 4-10 | 28.8, 29.0, 29.0, 29.0, 29.1, 29.1, 29.2 | 1.14-1.27 m                                                 |                   |                                           |
| 11   | 28.8                                     | 1.14-1.27 m                                                 |                   |                                           |
| 12   | 25.4                                     | 1.41 m                                                      | 13                | 11, 13, 14                                |
| 13   | 35.4                                     | 2.05 m                                                      | 12                | 11, 12, 14                                |
| 14   | 172.5 <b>10a</b> /<br>172.4 <b>10b</b>   | -                                                           |                   |                                           |
|      |                                          | NH, 8.03 <b>10a</b> d (7.7)/<br>NH, 8.01 <b>10b</b> d (7.7) | 15                | 14, 15, 16                                |
| 15   | 50.2                                     | 4.46 m                                                      | 14NH, 16a,<br>16b | 16, 18                                    |
| 16   | 37.7 <b>10a</b> /<br>37.8 <b>10b</b>     | a 2.35 dd (8.5, 15.3)<br>b 2.41 dd (4.3, 15.3)              | 15, 16b           | 15, 17                                    |
| 17   | 171.6                                    | -                                                           | 15, 16a           | 15, 17                                    |
|      |                                          | a NH, 6.84 s<br>b NH, 7.31 s                                | 17NHb<br>17NHa    | 16, 17<br>17                              |
| 18   | 170.6 <b>10a</b> /<br>170.5 <b>10b</b>   | -                                                           |                   |                                           |
|      |                                          | NH, 7.58 <b>10a</b> d (7.7)/<br>NH, 7.66 <b>10b</b> d (7.7) | 19                | 18, 19, 20, 21                            |

|    |                                        |                                                                                            |                        |                    |
|----|----------------------------------------|--------------------------------------------------------------------------------------------|------------------------|--------------------|
| 19 | 44.7                                   | 3.70 m                                                                                     | 18NH, 20, 21a, 21b     | 18, 20, 21, 22     |
| 20 | 20.4                                   | 0.99 d (6.0)                                                                               | 19, 21b                | 19, 21             |
| 21 | 30.3 <b>10a</b> /<br>30.4 <b>10b</b>   | a 1.44 m<br><br>b 1.57 m                                                                   | 19, 21b, 22a, 22b      | 19, 22             |
| 22 | 34.9 <b>10a</b> /<br>35.0 <b>10b</b>   | a 1.69 <b>10a</b> m/<br>a 1.79 <b>10b</b> m<br>b 1.79 <b>10a</b> m/<br>b 1.89 <b>10b</b> m | 21a, 21b, 22a, 22b     | 19, 21, 23         |
| 23 | 107.8                                  | -                                                                                          |                        |                    |
| 24 | 45.8 <b>10a</b> /<br>46.1 <b>10b</b>   | a 2.60 m<br><br>b 3.31 d (12.8)                                                            | 24b<br><br>24a         | 22, 23, 25         |
| 25 | 170.1 <b>10a</b> /<br>170.2 <b>10b</b> | -<br><br>NH, 7.86 br s                                                                     |                        | 25, 26, 27, 28     |
| 26 | 39.4                                   | -                                                                                          |                        |                    |
| 27 | 22.1                                   | a 0.87 m<br>b 1.10 m                                                                       | 27b, 28a, 28b          | 26                 |
| 28 | 22.1                                   | a 0.87 m<br>b 1.10 m                                                                       | 27a, 28a, 28b          | 29                 |
| 29 | 205.4                                  | -                                                                                          |                        |                    |
| 30 | 48.4                                   | a 3.10 d (14.5)<br>b 3.71 m                                                                | 30b<br>30a             | 26, 29, 31         |
| 31 | 166.9                                  | -<br><br>NH, 9.06 s                                                                        | 32a, 32b               | 31, 32             |
| 32 | 40.6                                   | a 4.27 d (14.5)<br>b 4.78 dd (6.8, 17.0)                                                   | 31NH, 32b<br>31NH, 32a | 33                 |
| 33 | 168.1                                  | -                                                                                          |                        |                    |
| 34 | 120.1                                  | 8.03 s                                                                                     |                        | 32, 33, 35, 36, 37 |
| 35 | 154.1                                  | -                                                                                          |                        |                    |
| 36 | 107.6                                  | -                                                                                          |                        |                    |
| 37 | 160.4                                  | -                                                                                          |                        |                    |
| 38 | 156.3                                  | -                                                                                          |                        |                    |
| 39 | 127.6                                  | 8.17 s                                                                                     |                        | 38, 40, 41         |
| 40 | 156.1                                  | -                                                                                          |                        |                    |
| 41 | 163.9                                  | -                                                                                          |                        |                    |

---

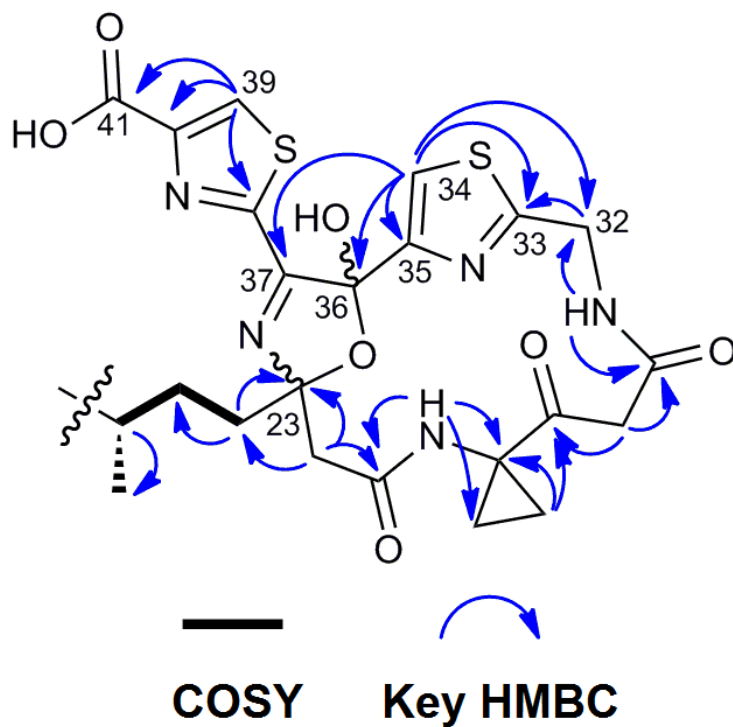

NMR-based key correlations for the structural assignment of **10**.

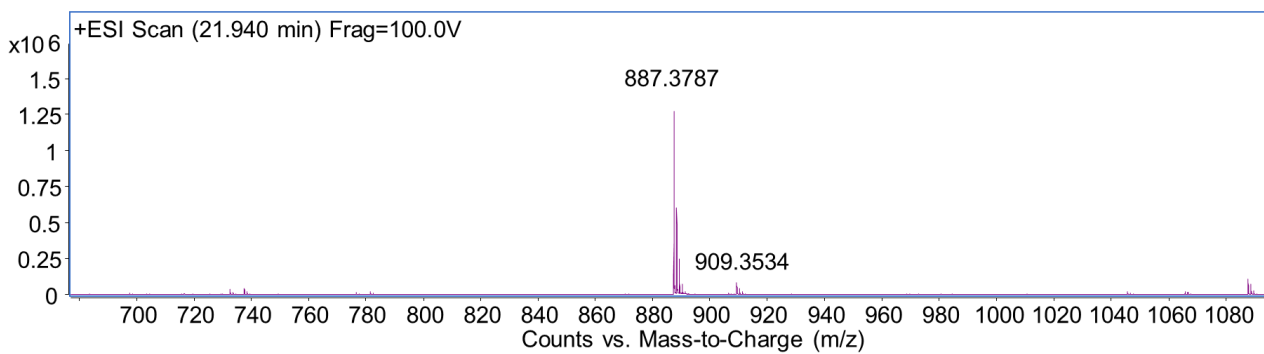

HRESIMS of **10**.



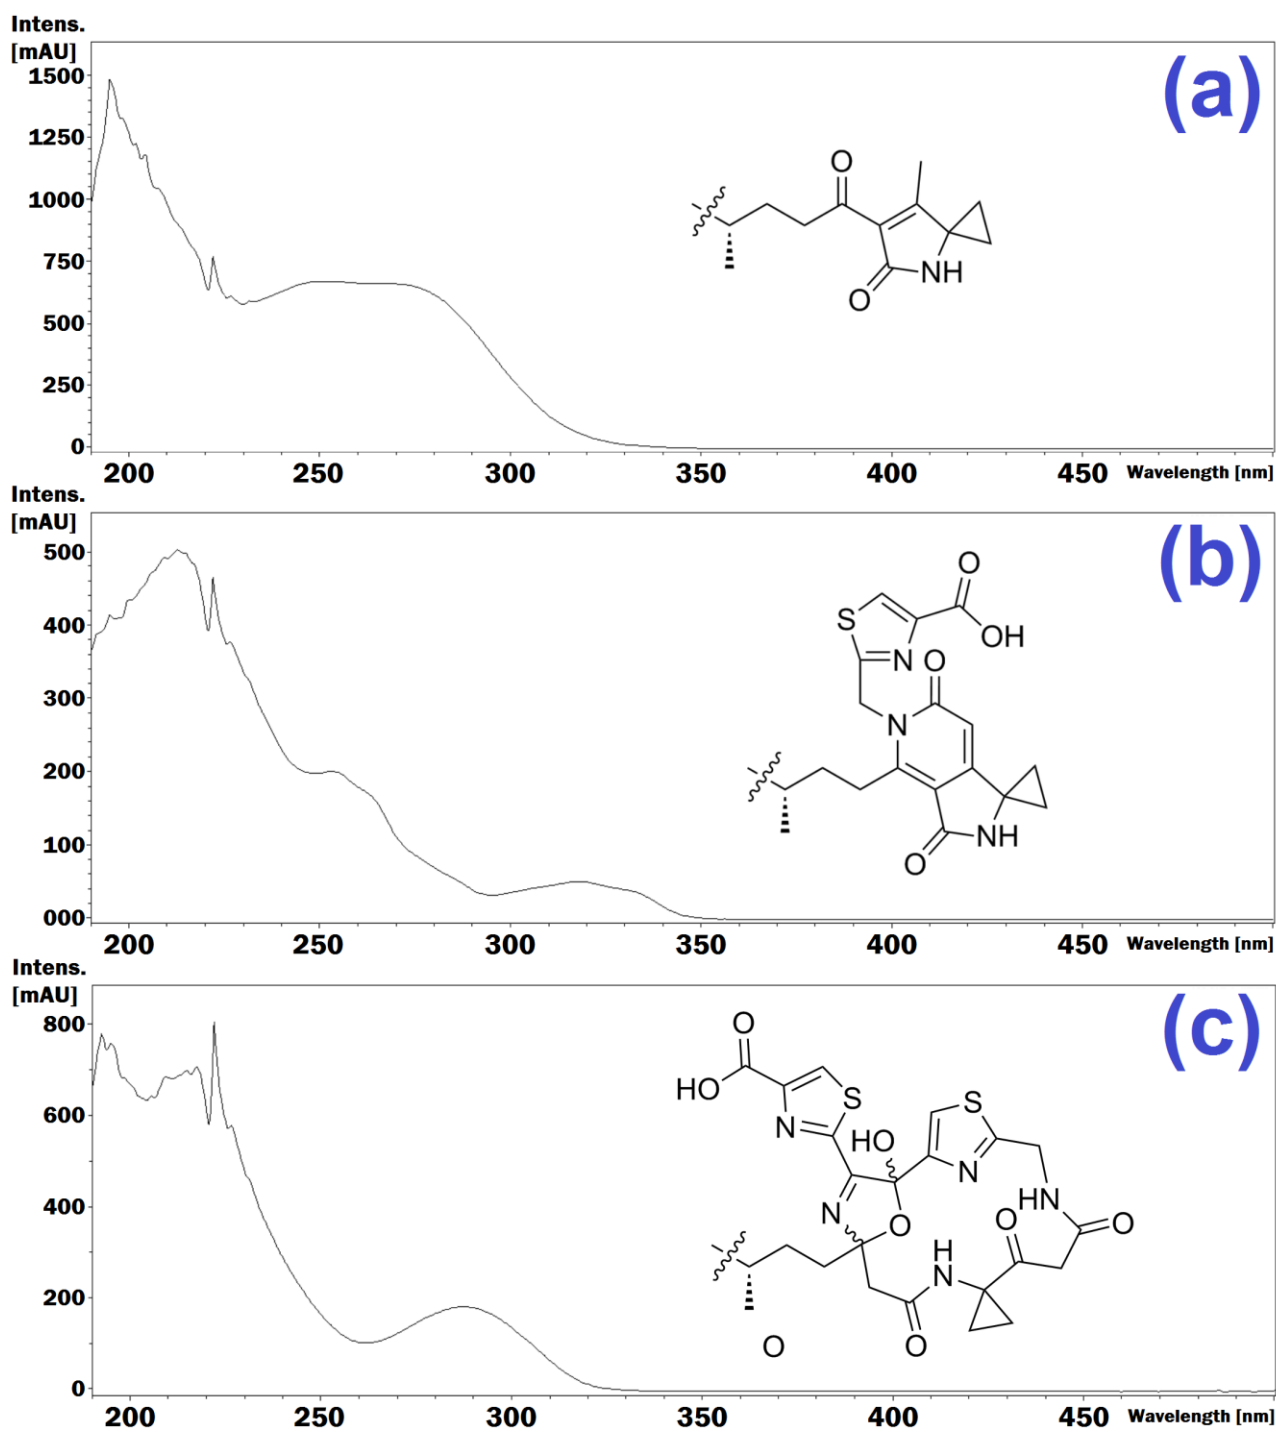

UV spectrum of **10** (c) in comparison with those of **5** (a) and **7** (b).

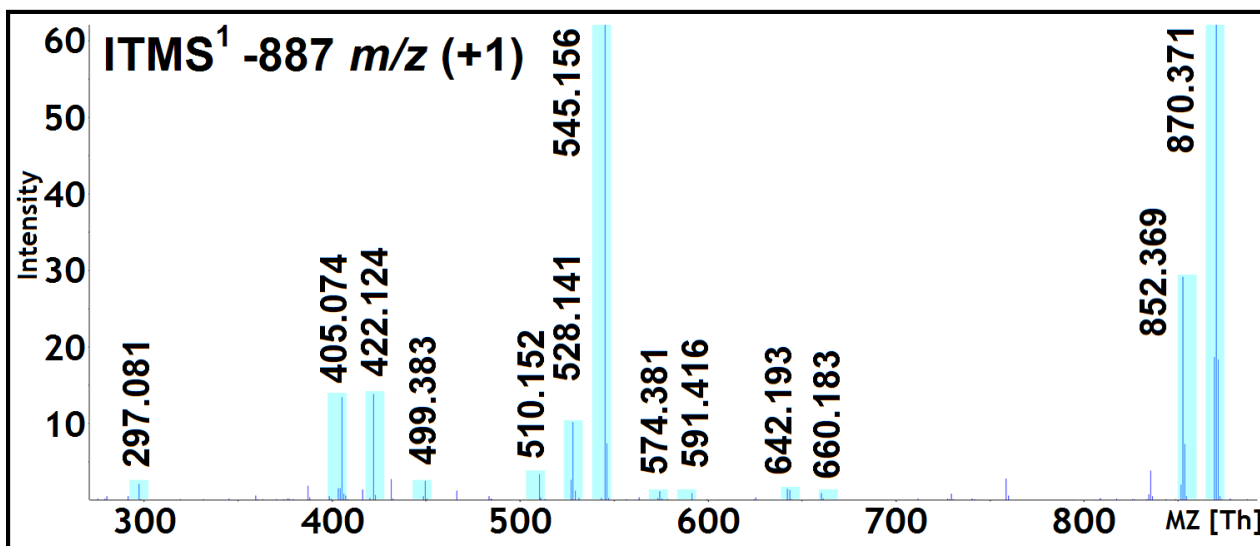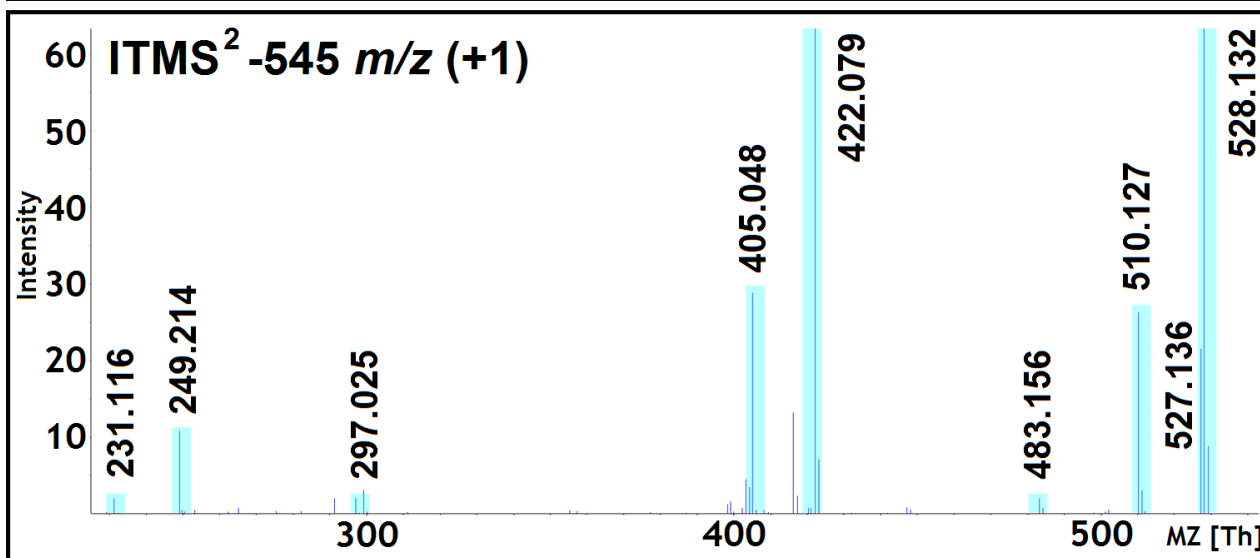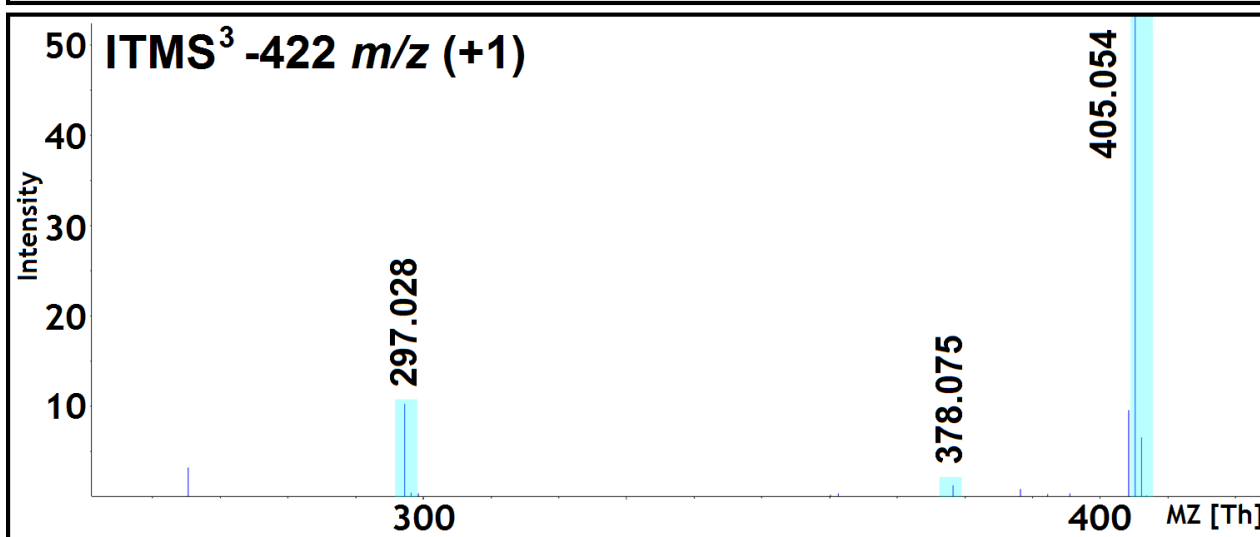

MS<sup>n</sup> fragmentation pattern of **10**.

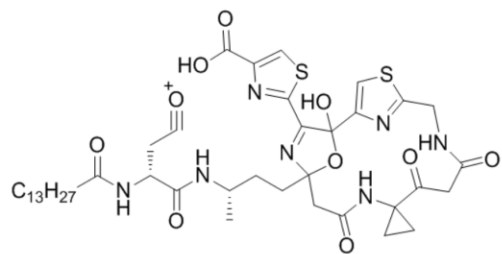

**Frag. 1**

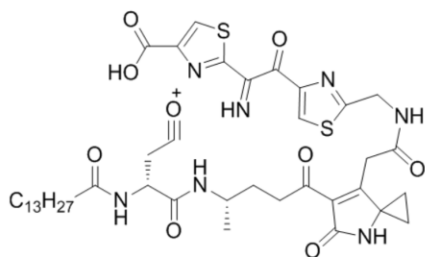

**Frag. 2**

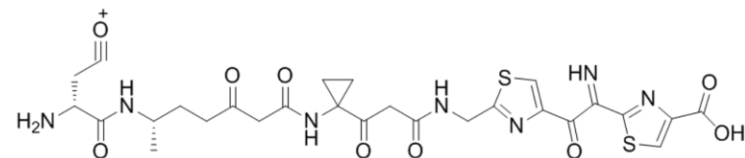

**Frag. 3**

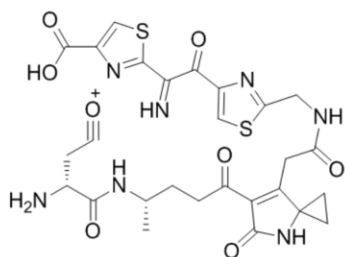

**Frag. 4**

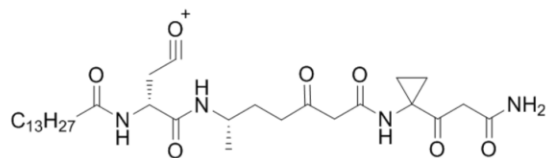

**Frag. 5**

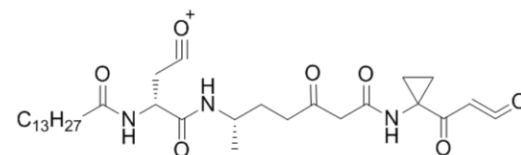

**Frag. 6**

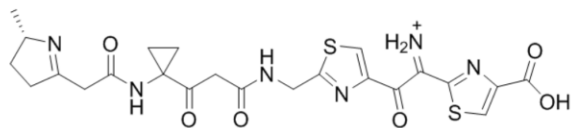

**Frag. 7**

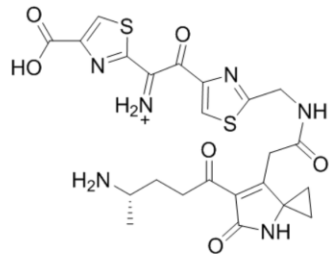

**Frag. 7**

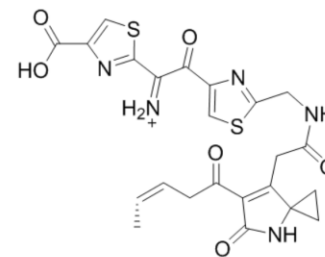

**Frag. 8**

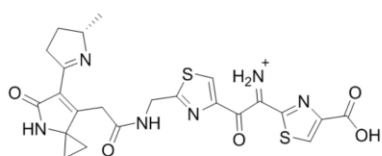

**Frag. 9**

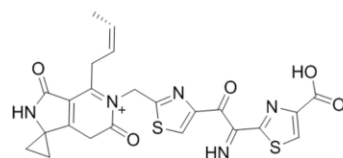

**Frag. 10**

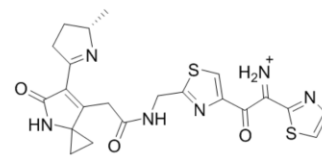

**Frag. 11**

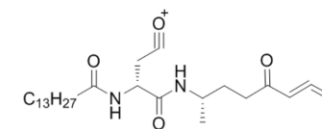

**Frag. 12**

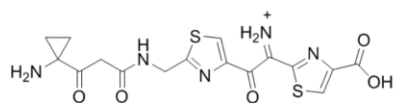

**Frag. 13**

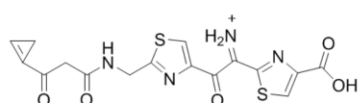

**Frag. 14**

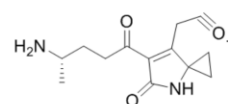

**Frag. 17**

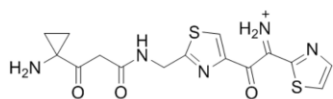

**Frag. 15**

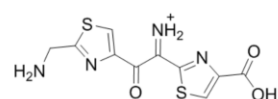

**Frag. 16**

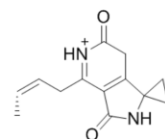

**Frag. 18**

| Fragmentation | MS <sup>n</sup>                                   | Obs. mass | Calc. mass | Error [Da] |
|---------------|---------------------------------------------------|-----------|------------|------------|
| 1             | MS <sup>2</sup>                                   | 870.371   | 870.353    | 0.018      |
| 2             | MS <sup>2</sup>                                   | 852.369   | 852.342    | 0.027      |
| 3             | MS <sup>2</sup>                                   | 660.183   | 660.155    | 0.028      |
| 4             | MS <sup>2</sup>                                   | 642.193   | 642.144    | 0.049      |
| 5             | MS <sup>2</sup>                                   | 591.416   | 591.376    | 0.040      |
| 6             | MS <sup>2</sup>                                   | 574.381   | 574.349    | 0.032      |
| 7             | MS <sup>2</sup>                                   | 545.156   | 545.128    | 0.028      |
| 8             | MS <sup>2</sup> /MS <sup>3</sup>                  | 528.141   | 528.101    | 0.040      |
| 9             | MS <sup>3</sup>                                   | 527.136   | 527.117    | 0.019      |
| 10            | MS <sup>2</sup> /MS <sup>3</sup>                  | 510.152   | 510.091    | 0.061      |
| 11            | MS <sup>3</sup>                                   | 483.156   | 483.127    | 0.029      |
| 12            | MS <sup>2</sup>                                   | 449.383   | 449.302    | 0.081      |
| 13            | MS <sup>2</sup> /MS <sup>3</sup>                  | 422.124   | 422.059    | 0.065      |
| 14            | MS <sup>2</sup> /MS <sup>3</sup> /MS <sup>4</sup> | 405.074   | 405.033    | 0.041      |
| 15            | MS <sup>4</sup>                                   | 378.075   | 378.070    | 0.006      |
| 16            | MS <sup>2</sup> /MS <sup>3</sup> /MS <sup>4</sup> | 297.081   | 297.012    | 0.069      |
| 17            | MS <sup>3</sup>                                   | 249.214   | 249.124    | 0.090      |
| 18            | MS <sup>3</sup>                                   | 231.116   | 231.113    | 0.003      |

The major fragmentation species from MS<sup>n</sup> measurement of **10**. Fragmentation was acquired with collision energy of 28 V. Obs. = observed; Calc. = calculated.

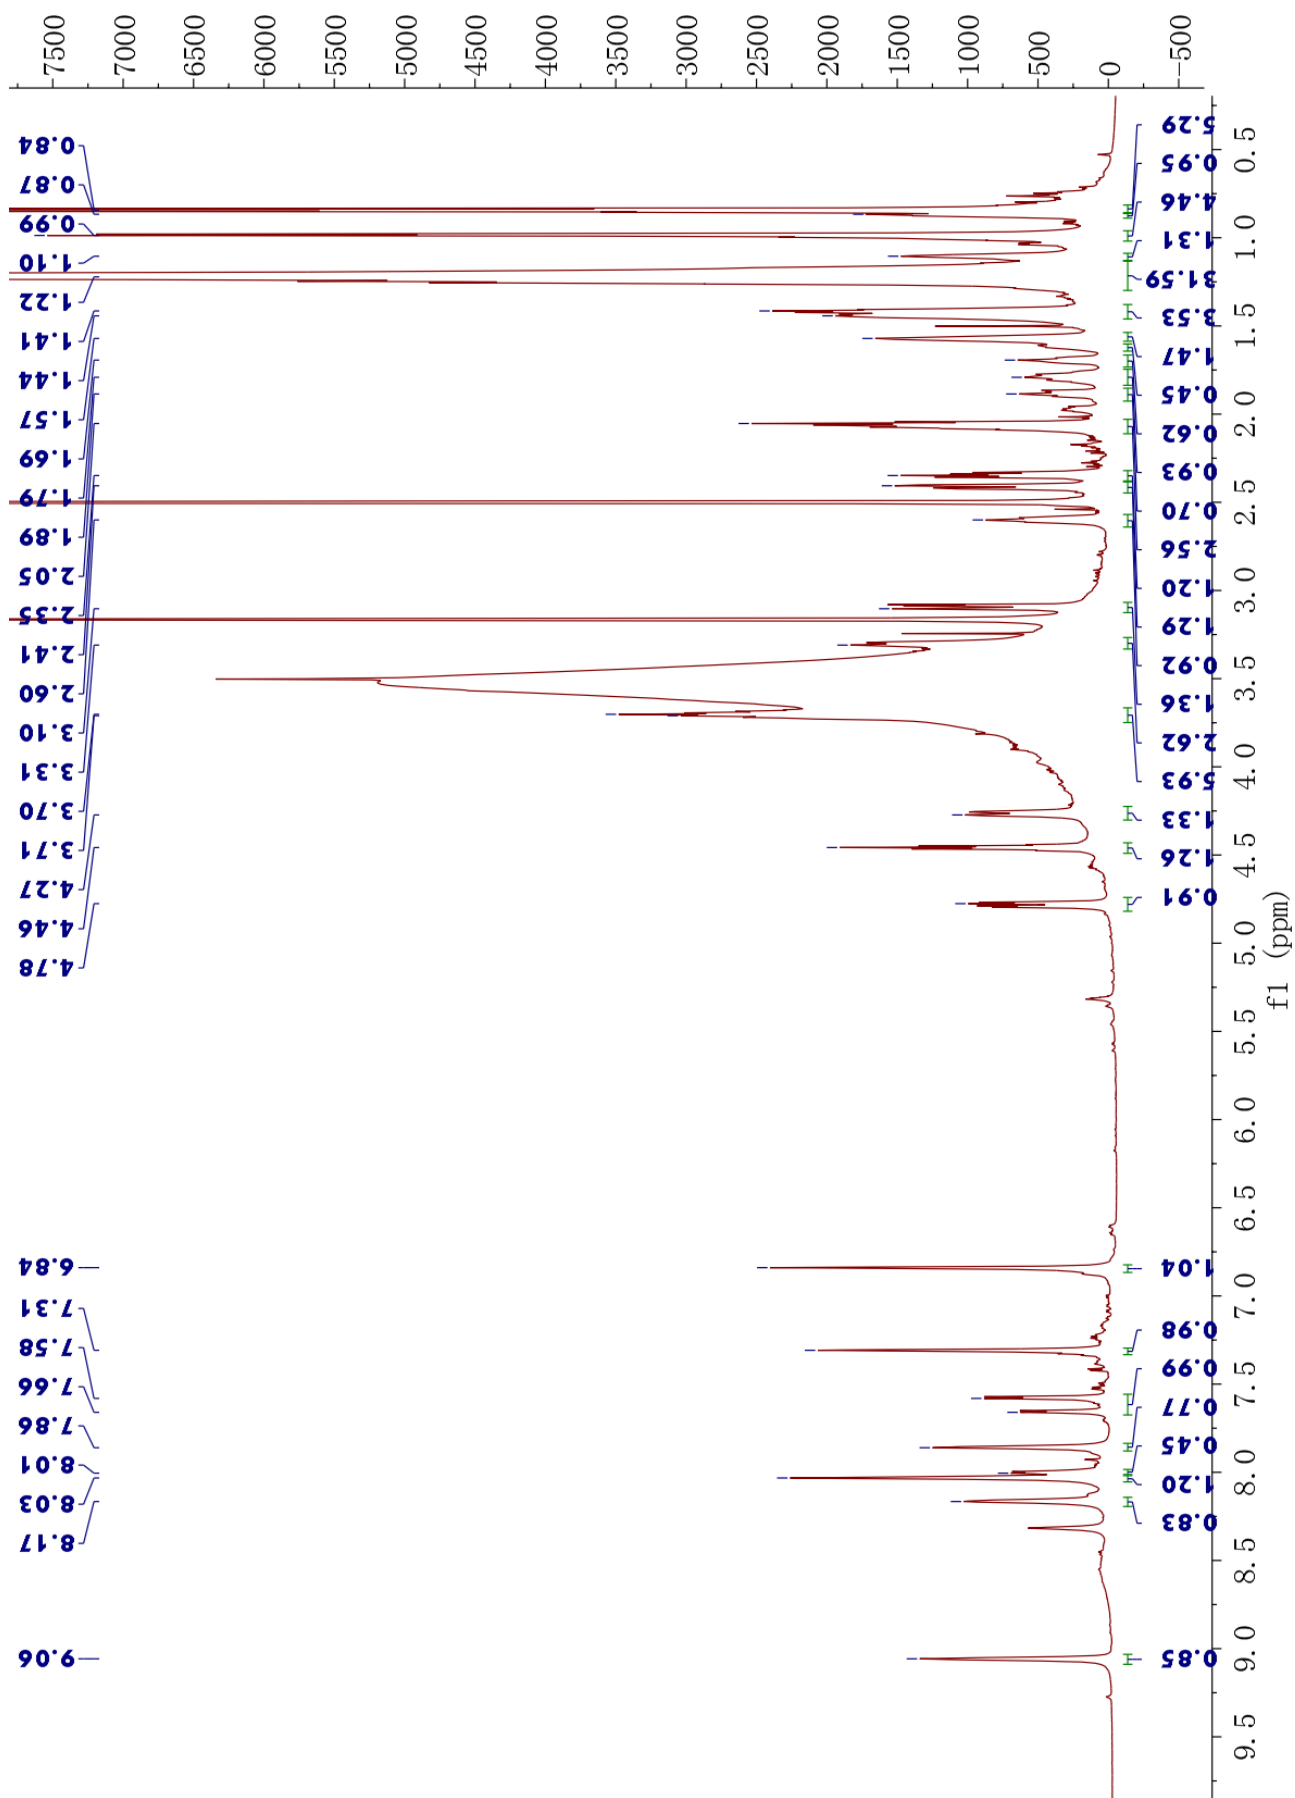

$^1\text{H}$  NMR spectrum of **10** (recorded in  $\text{DMSO-}d_6$  at 850 MHz).

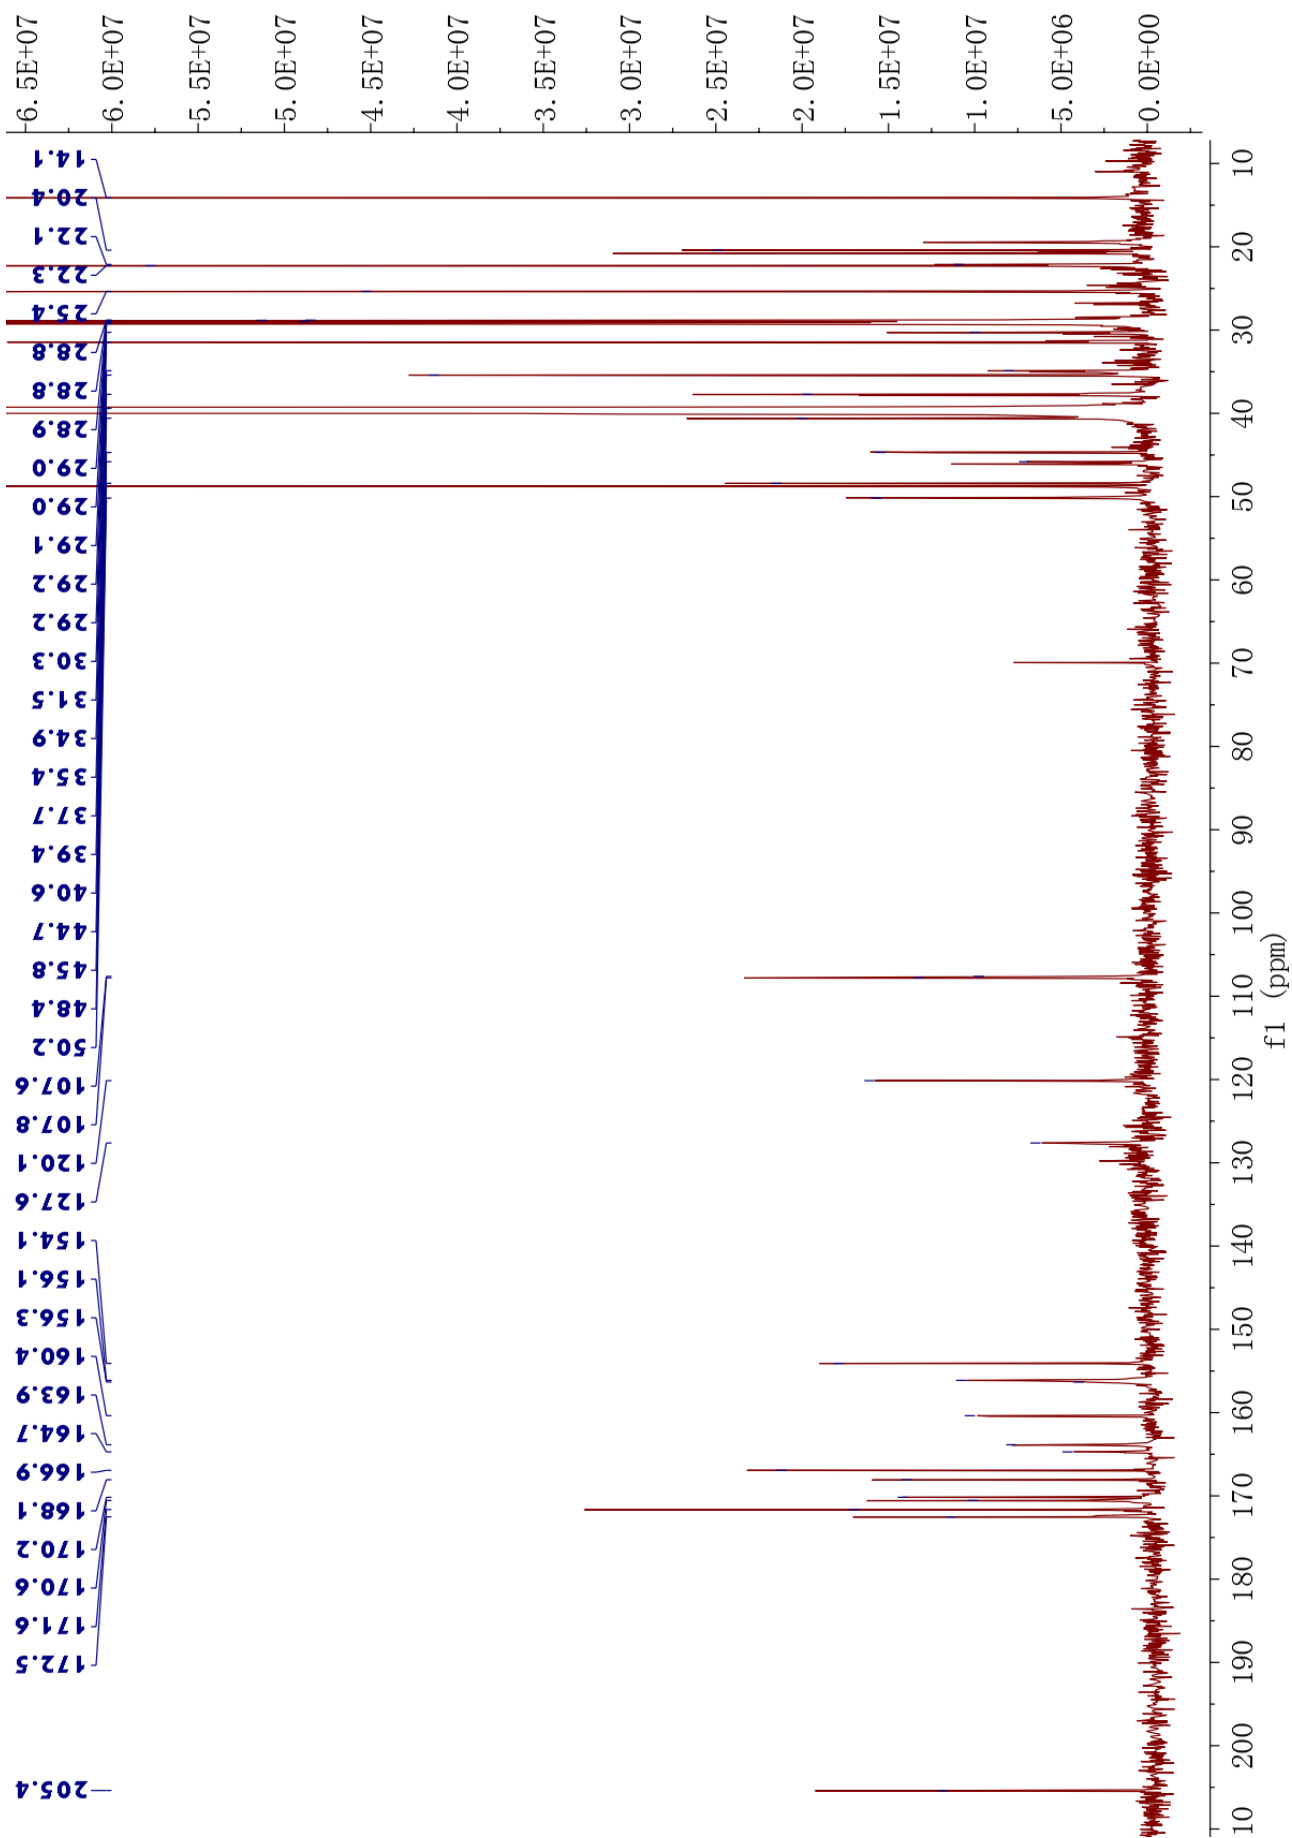

$^{13}\text{C}$  NMR spectrum of **10** (recorded in  $\text{DMSO-}d_6$  at 212.5 MHz).

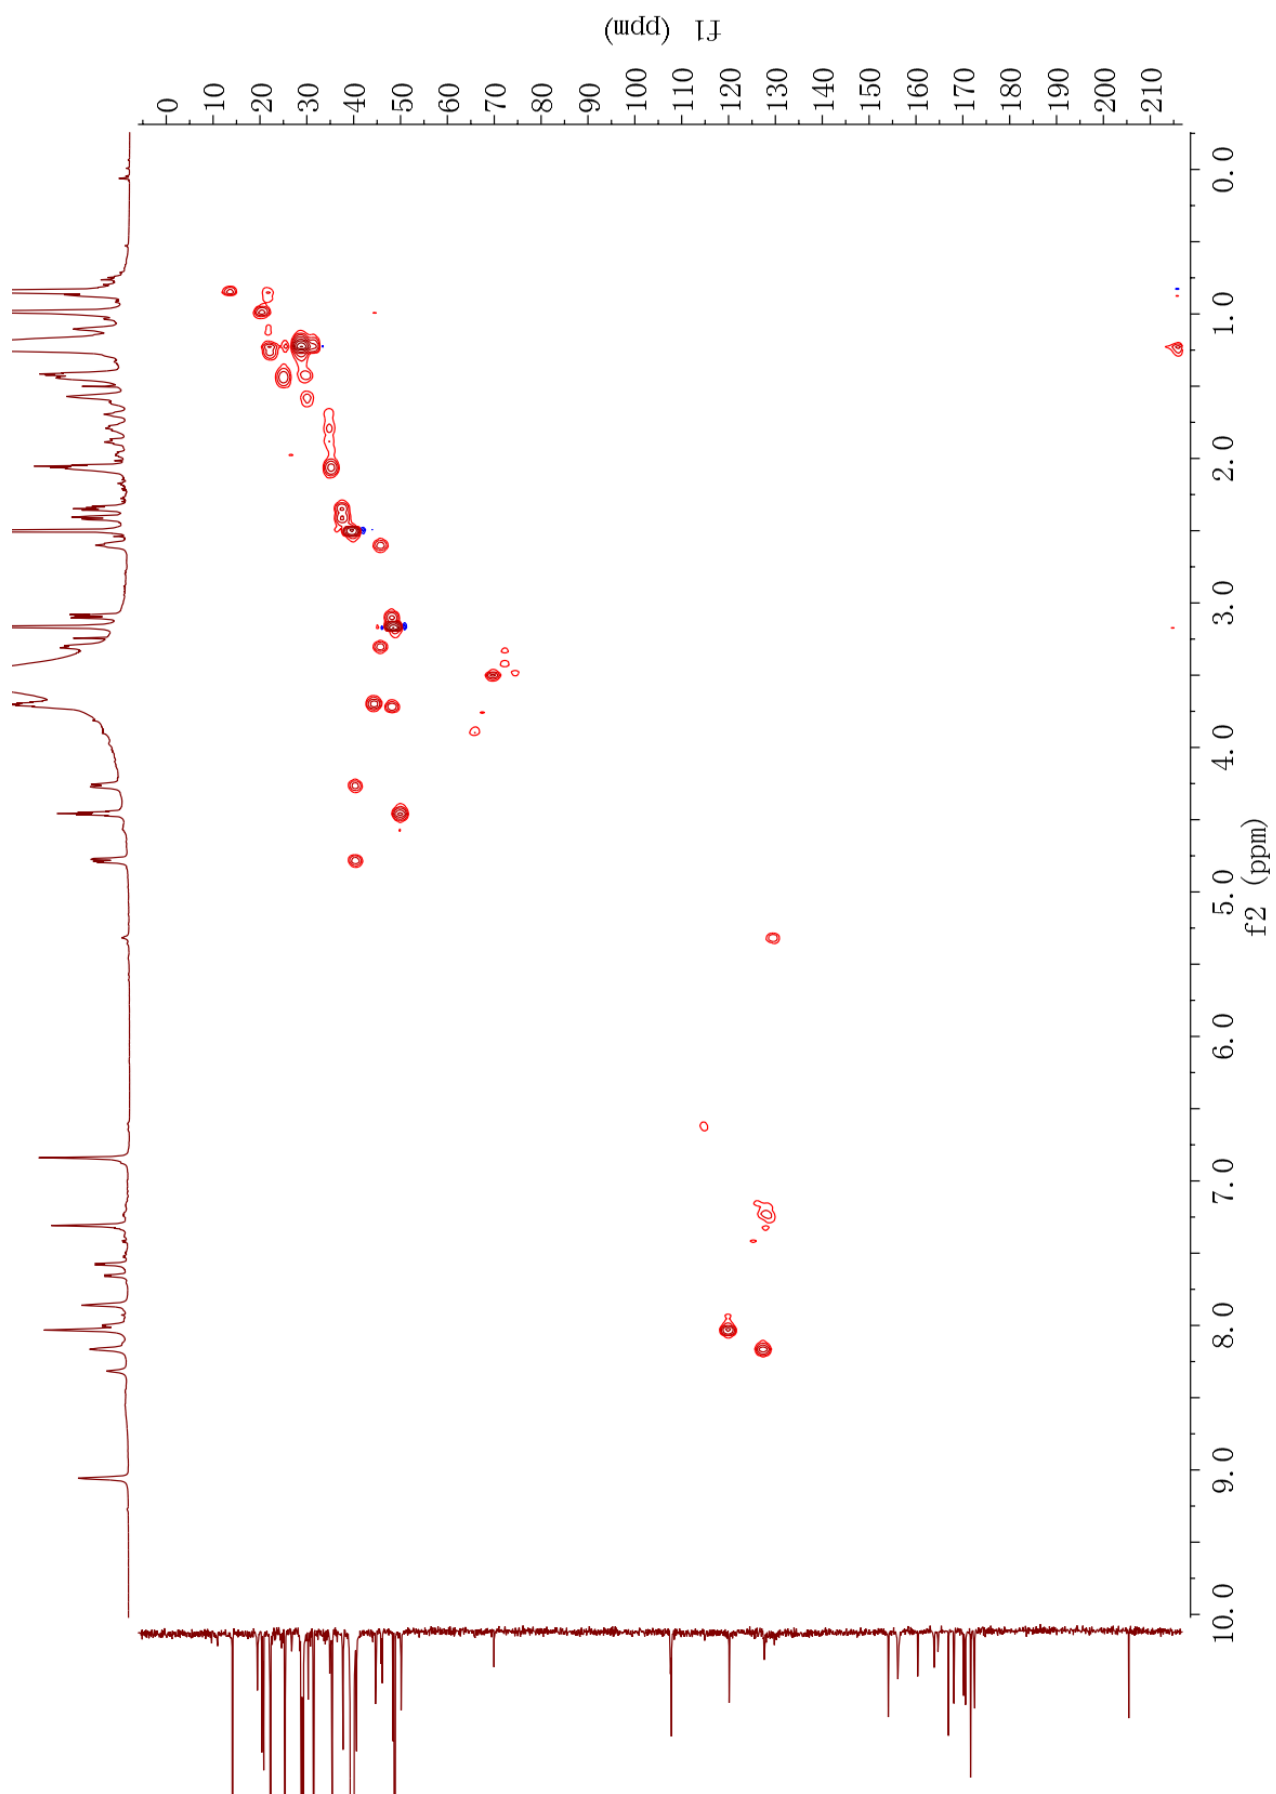

$^1\text{H}$ - $^{13}\text{C}$  HSQC spectrum of **10** (recorded in  $\text{DMSO-}d_6$  at 850 MHz).

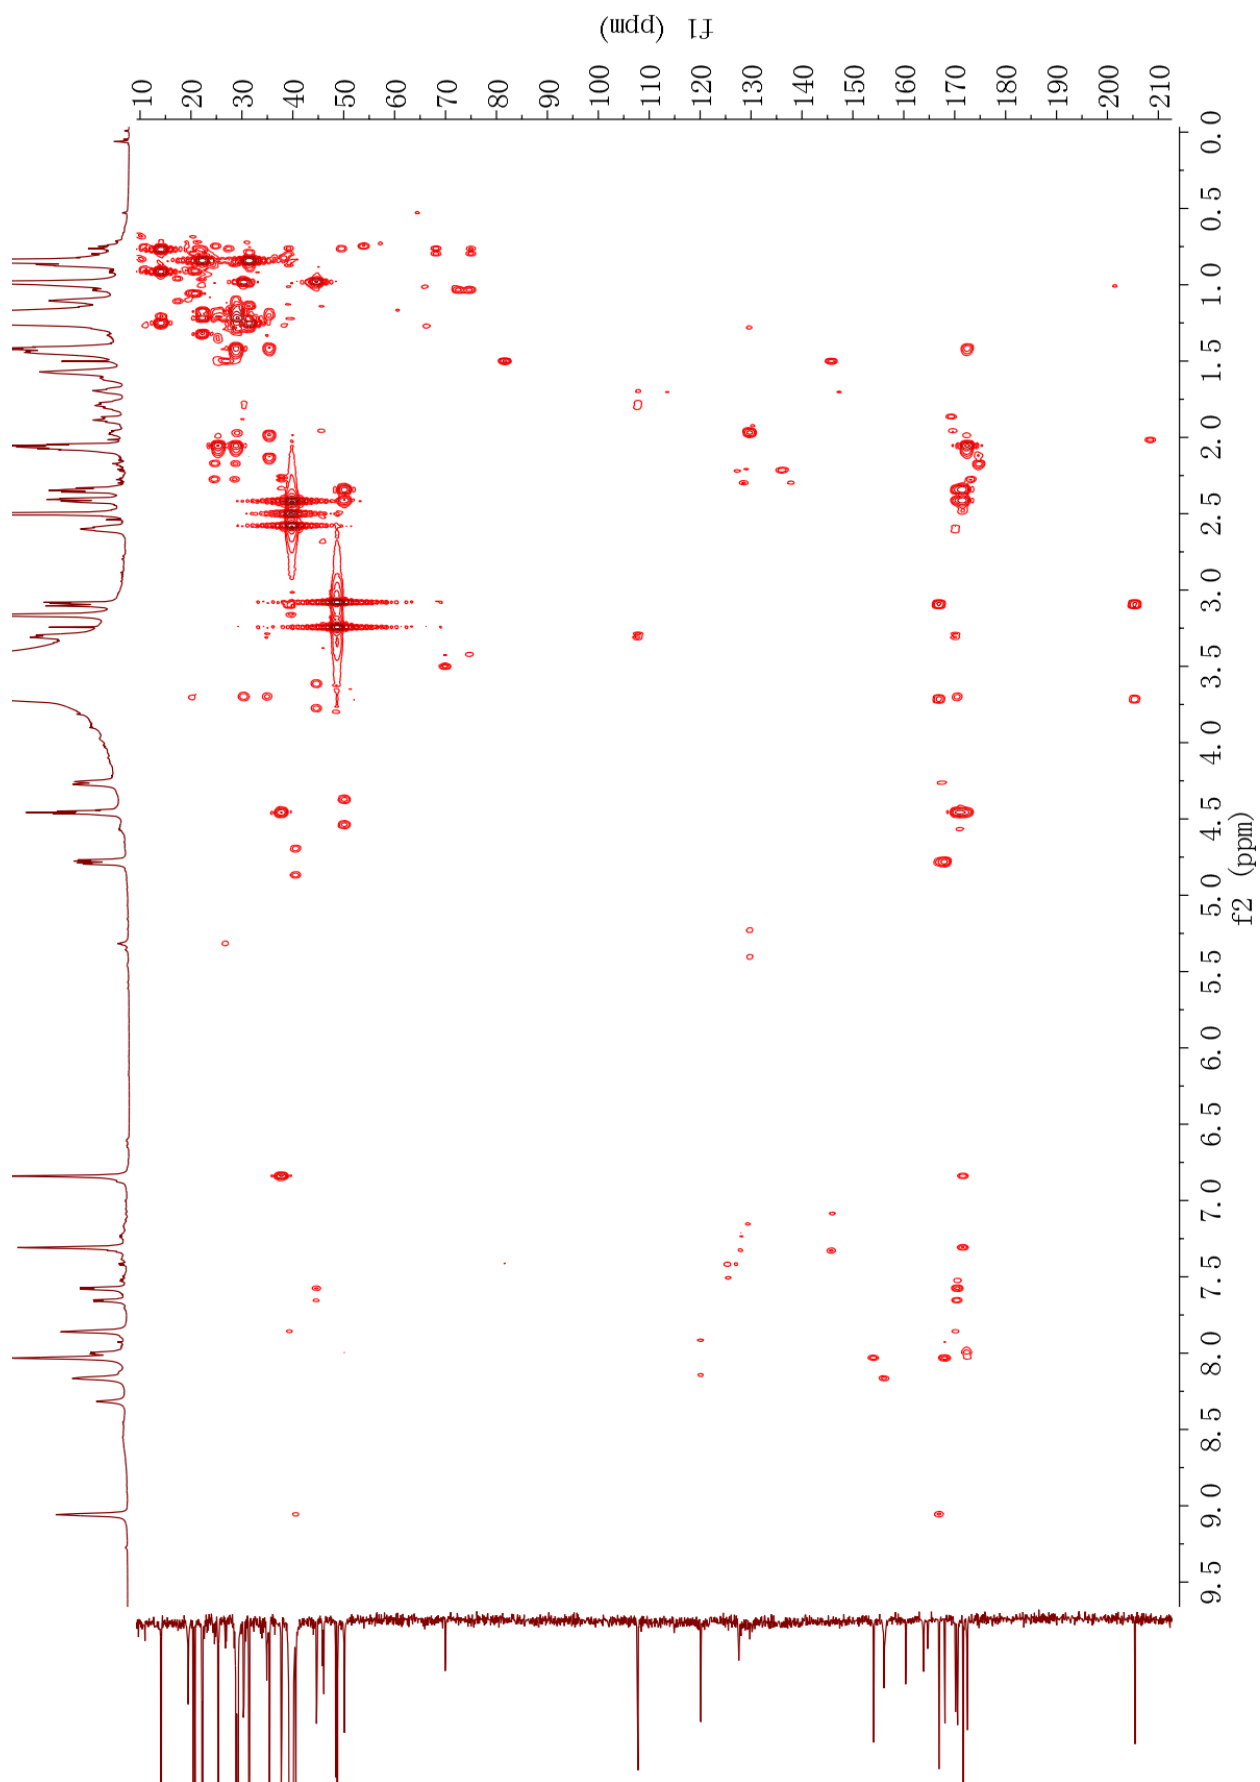

$^1\text{H}$ - $^{13}\text{C}$  HMBC spectrum of **10** (recorded in  $\text{DMSO-}d_6$  at 850 MHz).



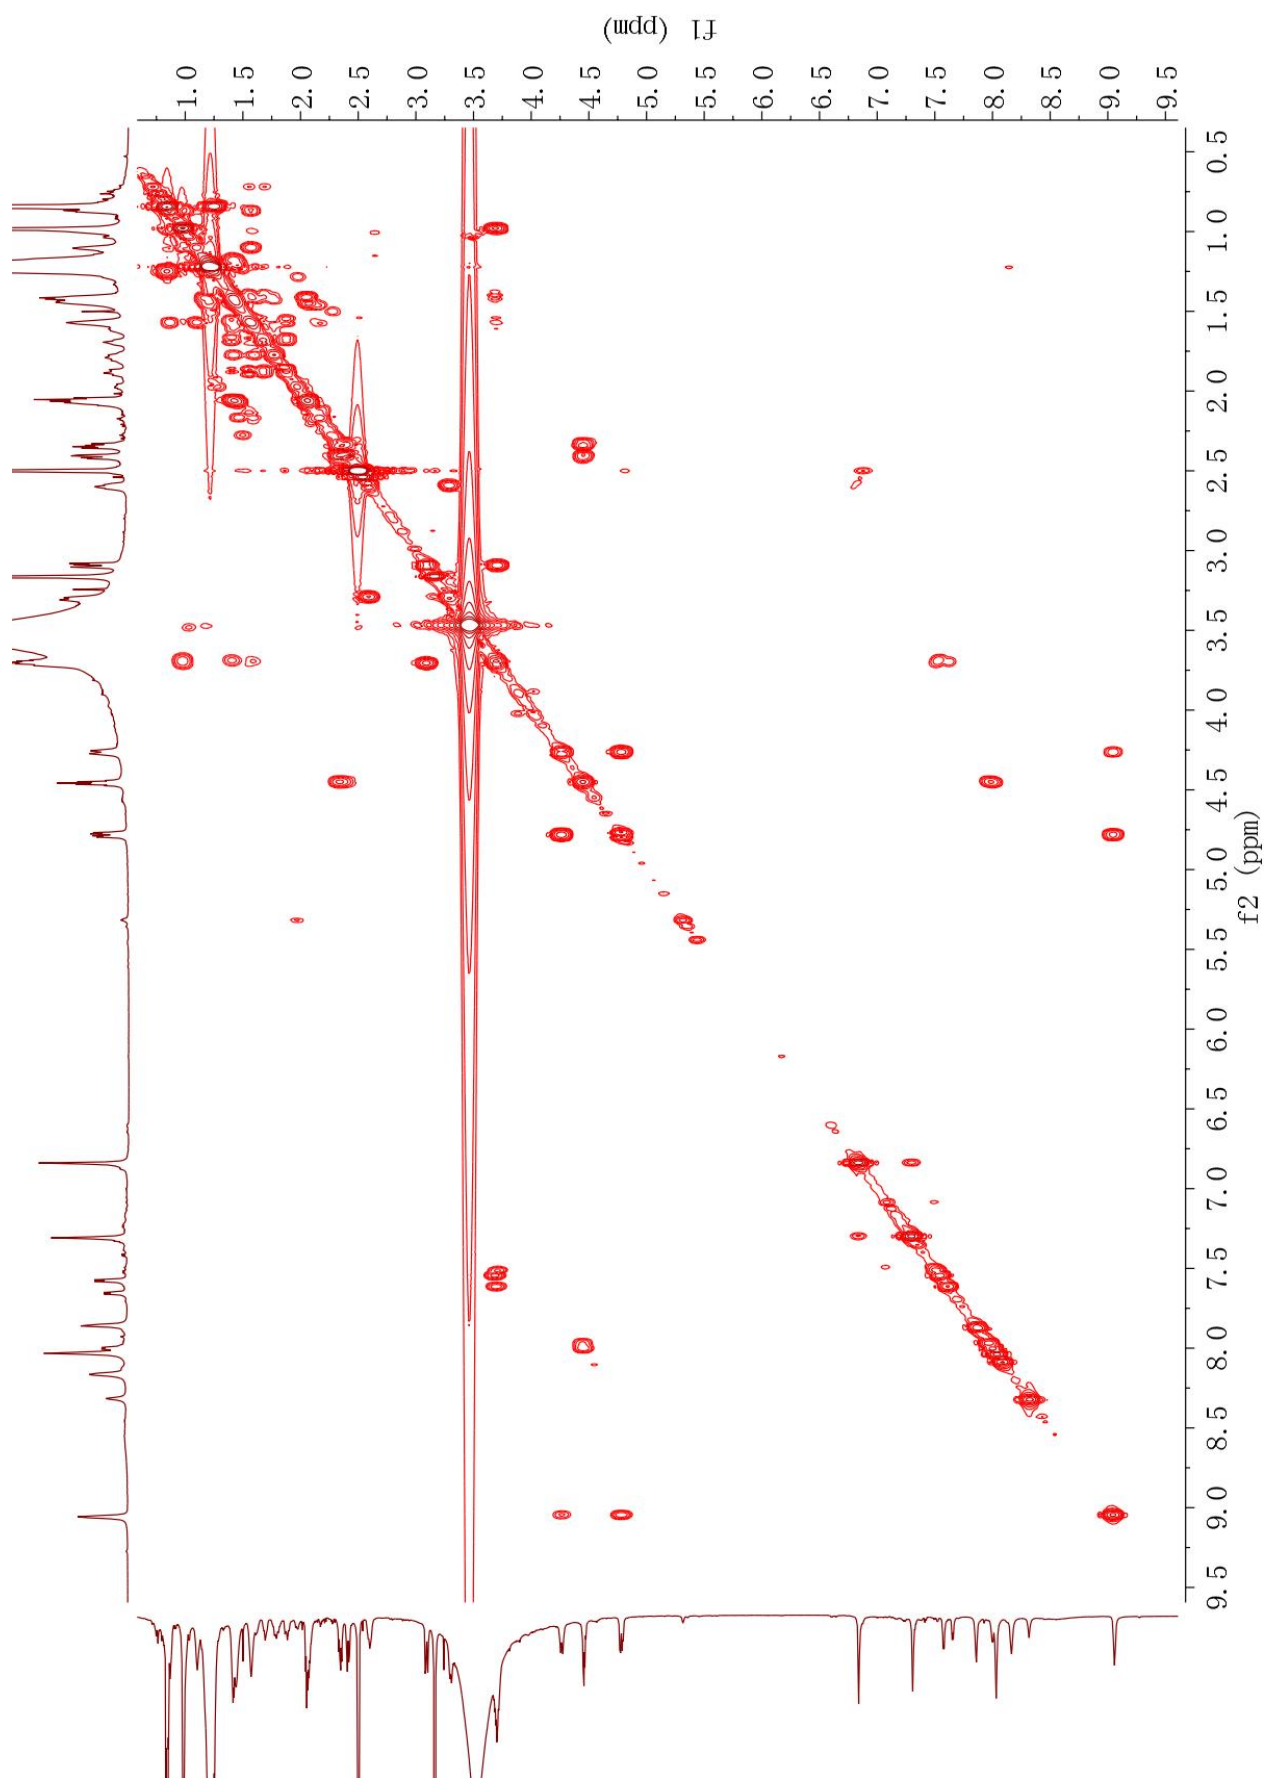

$^1\text{H}$ - $^1\text{H}$  COSY spectrum of **10** (recorded in  $\text{DMSO-}d_6$  at 850 MHz).

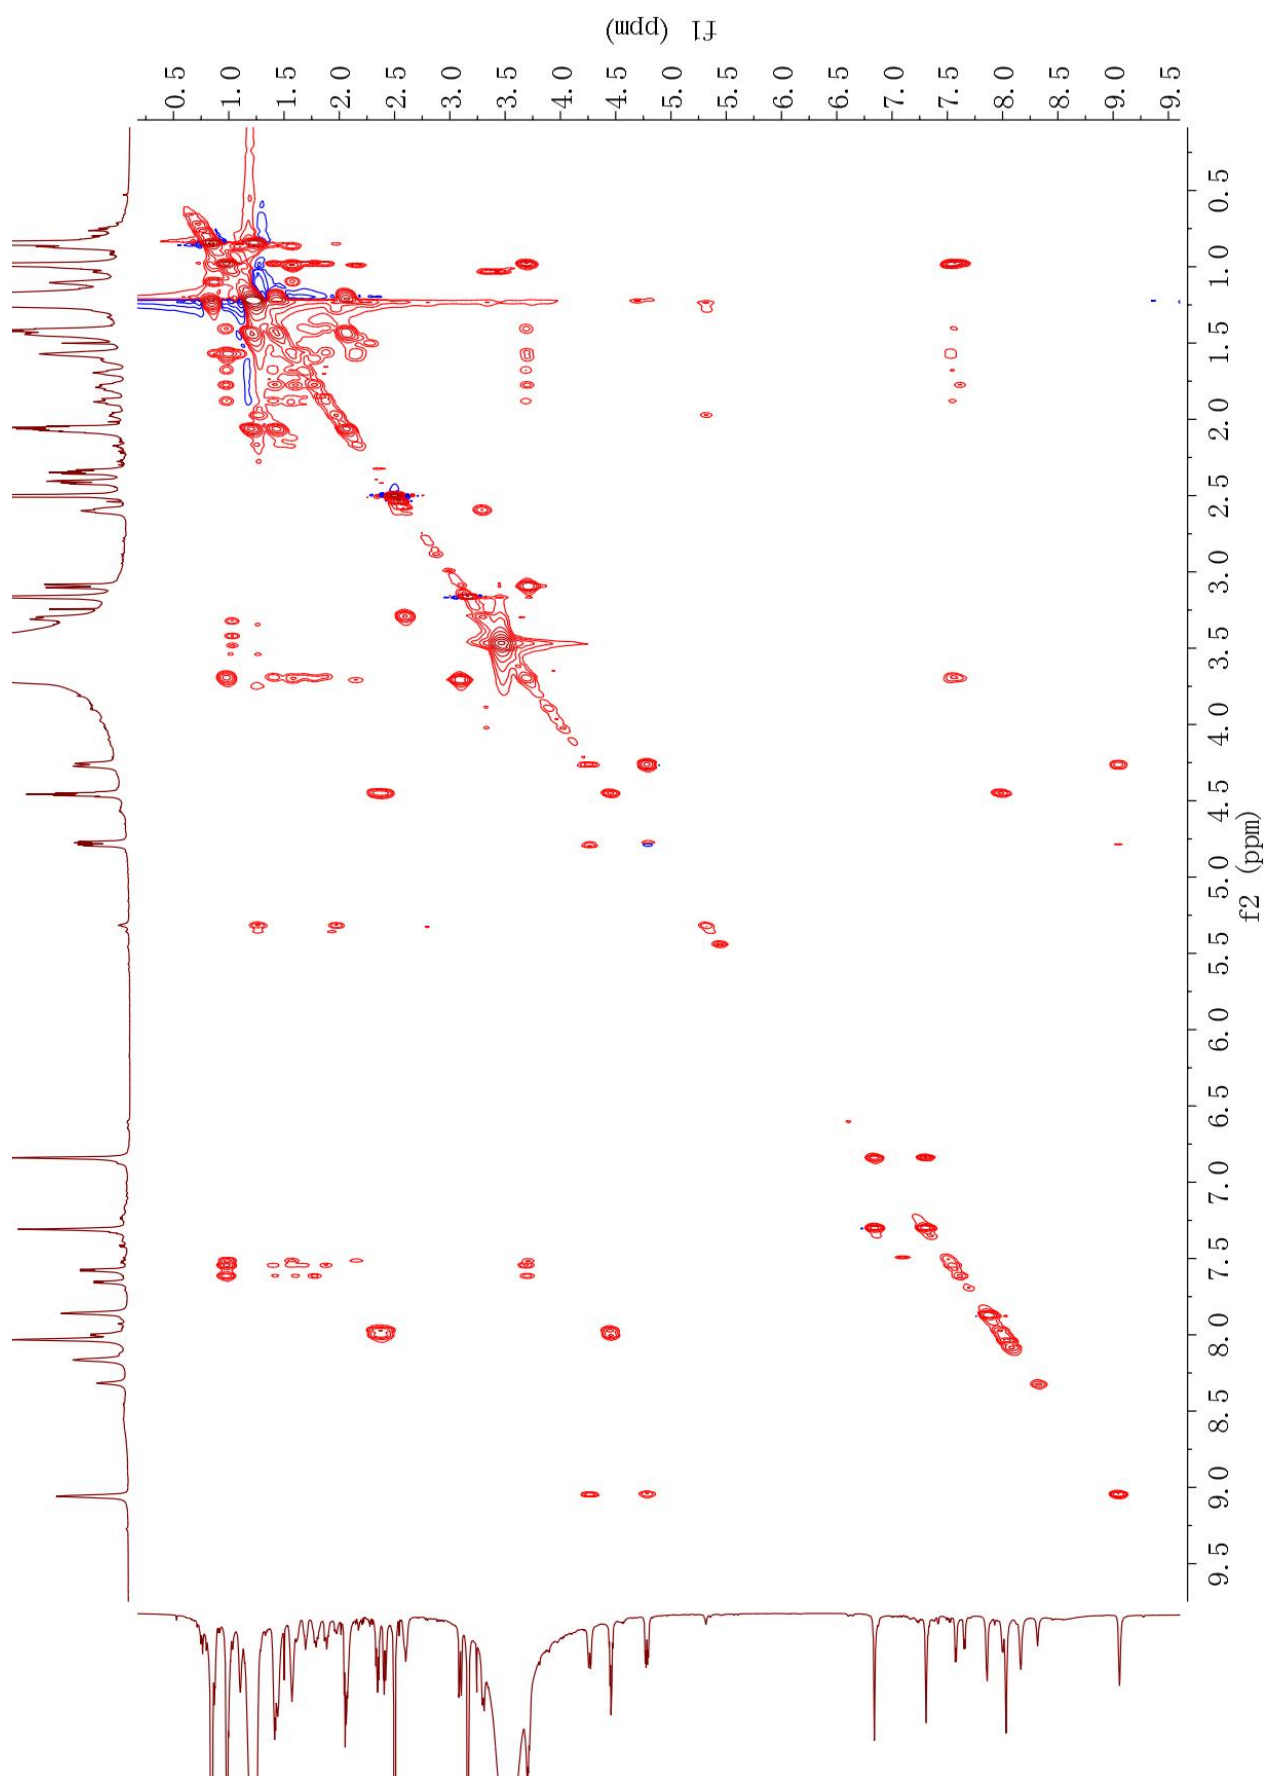

$^1\text{H}$ - $^1\text{H}$  TOCSY spectrum of **10** (recorded in  $\text{DMSO}-d_6$  at 850 MHz).

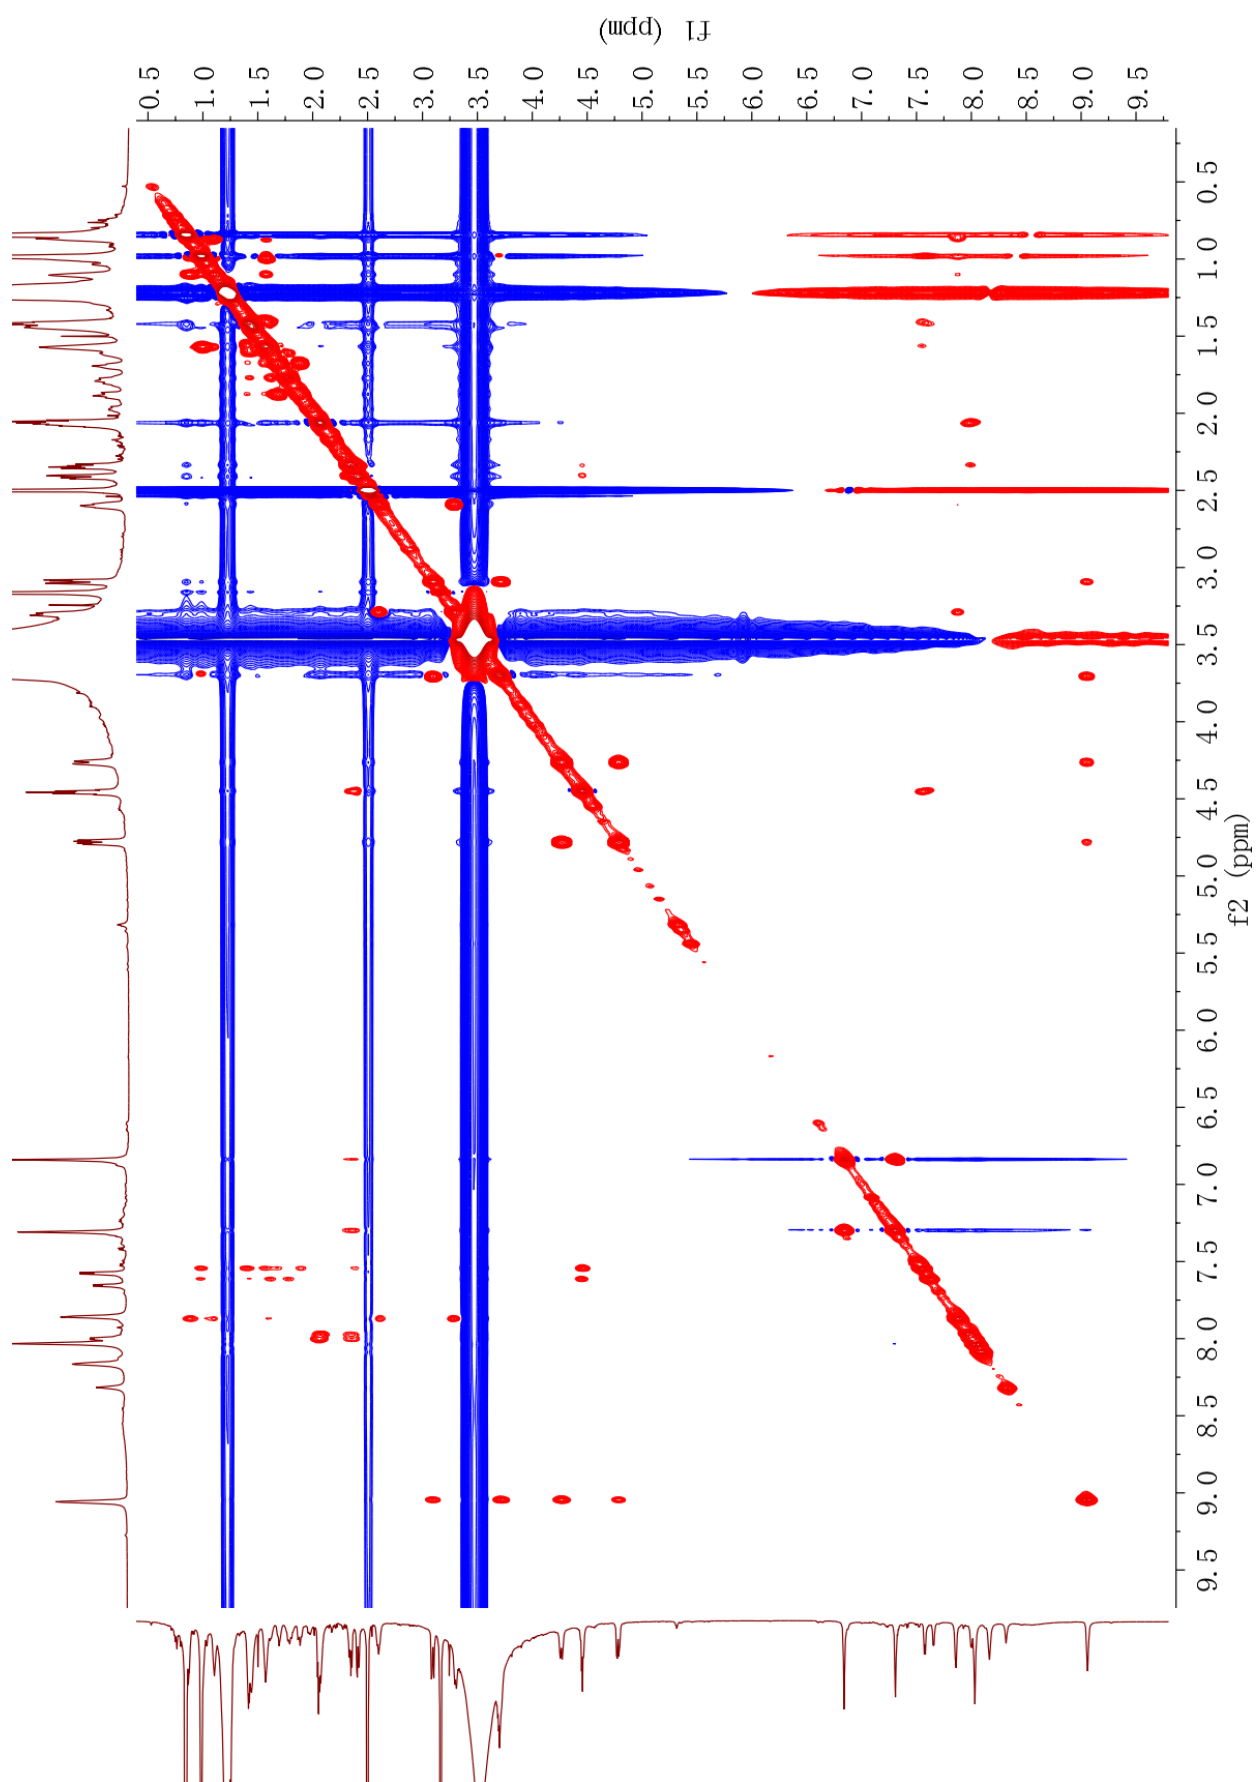

$^1\text{H}$ - $^1\text{H}$  NOESY spectrum of **10** (recorded in  $\text{DMSO-}d_6$  at 850 MHz).

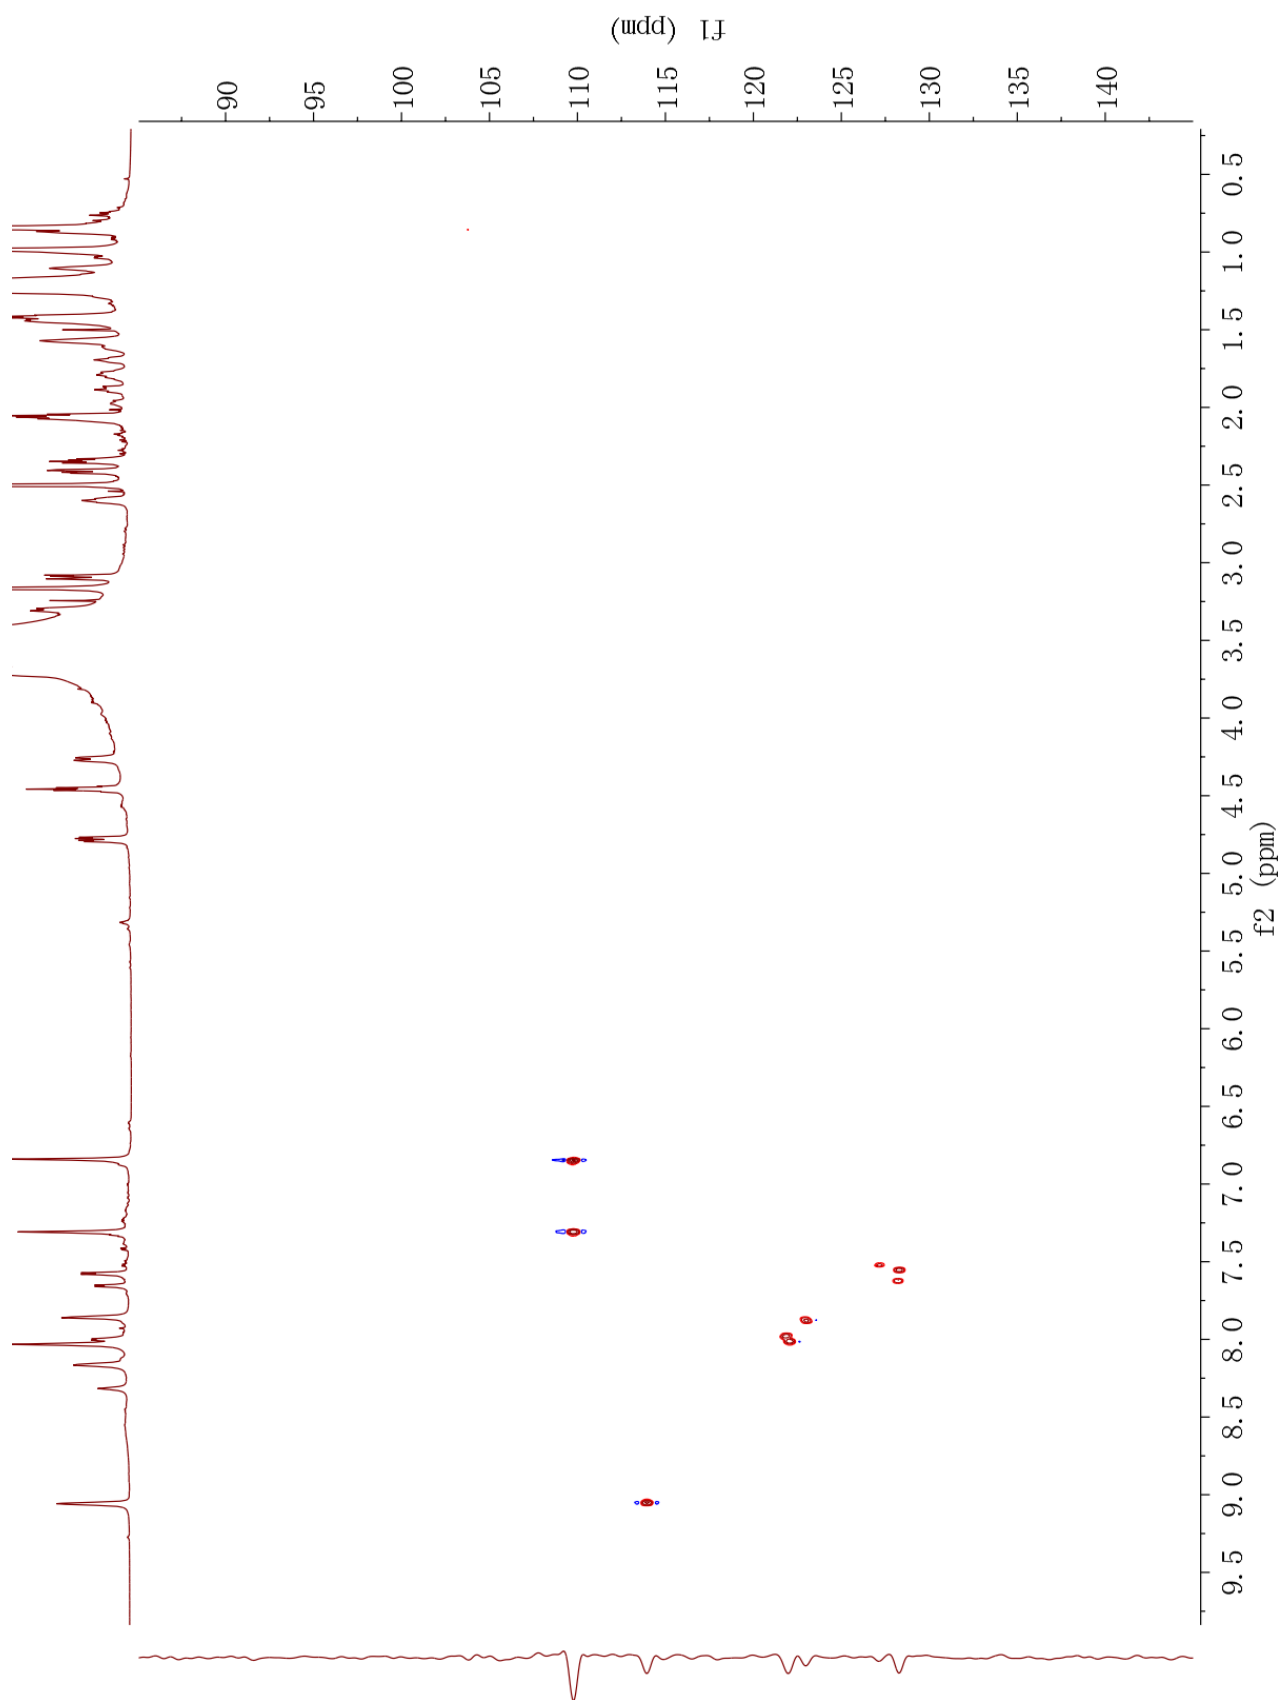

$^1\text{H}$ - $^{15}\text{N}$  HSQC spectrum of **10** (recorded in  $\text{DMSO-}d_6$  at 850 MHz).

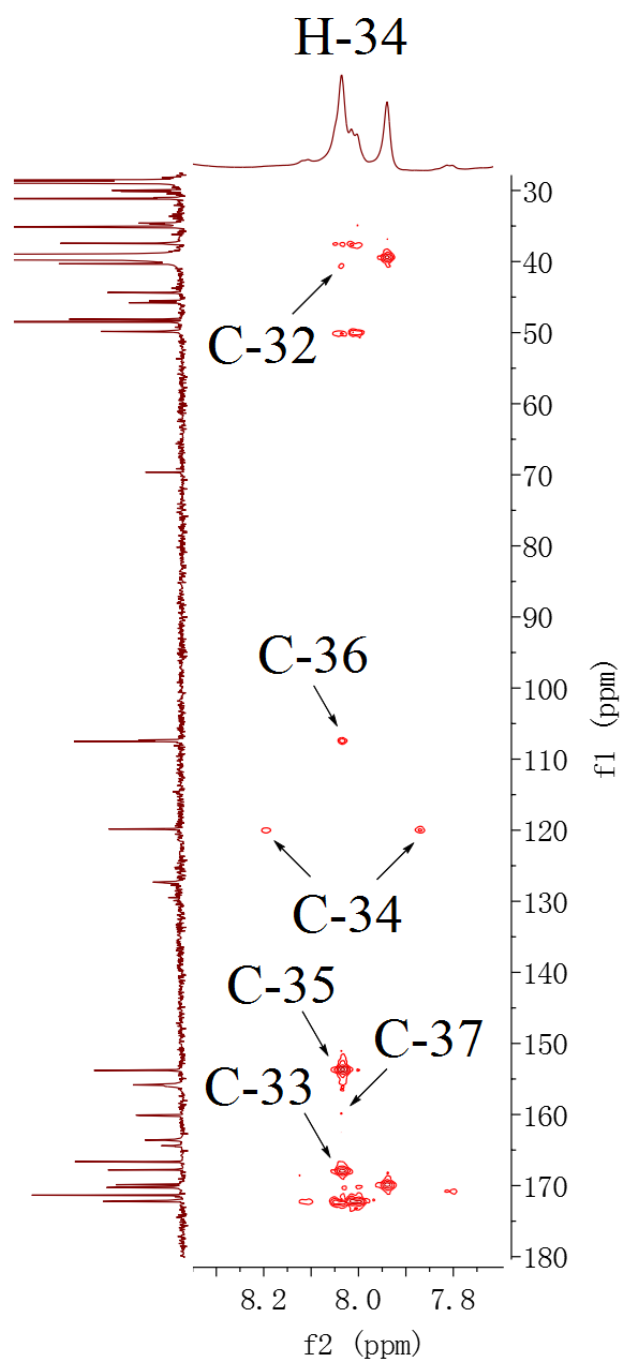

Expanded  $^1\text{H}$ - $^{13}\text{C}$  HMBC spectrum of **10** showing the key correlations of H-34 to C-32, C-33, C-35, C-36 and C-37 (recorded in  $\text{DMSO-}d_6$  at 600 MHz with a 1.7 mm cryoprobe).

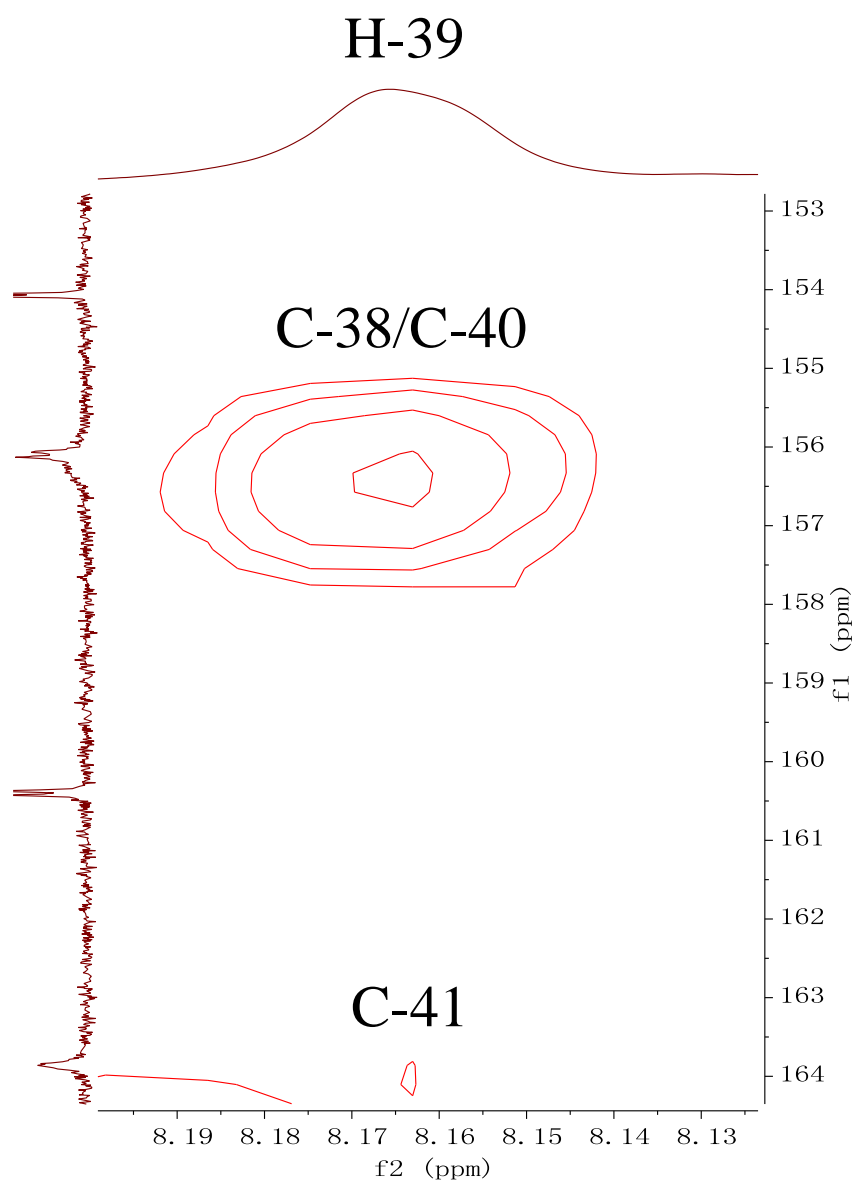

Expanded  $^1\text{H}$ - $^{13}\text{C}$  HMBC spectrum of **10** showing the key correlations of H-39 to C-38, C-40 and C-41 (recorded in  $\text{DMSO-}d_6$  at 850 MHz).

## Supplementary Note 3

### Structure characterization data of compound **6**

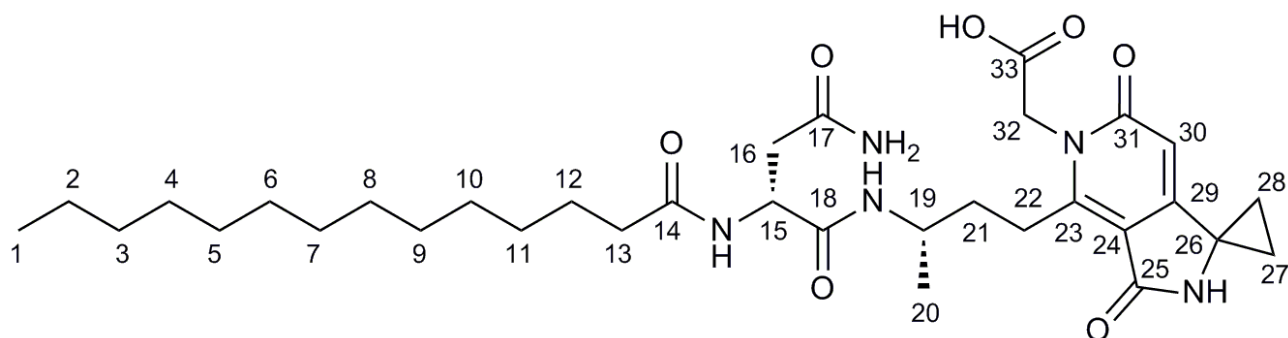

NMR spectroscopic data for **6** in DMSO-*d*<sub>6</sub>.

| C    | $\delta_C$                         | $\delta_H$ (J in Hz)              | COSY                                  | HMBC ( $^1H$ to $^{13}C$ ) |
|------|------------------------------------|-----------------------------------|---------------------------------------|----------------------------|
| 1    | 14.1                               | 0.84 t (7.2)                      | 2                                     | 2, 3                       |
| 2    | 22.3                               | 1.26 m                            | 1                                     | 1, 3                       |
| 3    | 31.5                               | 1.19-1.24 m                       |                                       |                            |
| 4-10 | 28.9, 29.1, 29.2, 29.2, 29.2, 29.2 | 1.19-1.24 m                       |                                       |                            |
| 11   | 28.8                               | 1.19-1.24 m                       | 12                                    |                            |
| 12   | 25.3                               | 1.46 m                            | 11, 13a, 13b                          | 11, 13, 14                 |
| 13   | 35.5                               | a 2.11 m<br>b 2.17 m              | 12, 13b<br>12, 13a                    | 11, 12, 14<br>11, 12, 14   |
| 14   | 172.6                              | -<br>NH, 8.13 br s                | 15                                    | 14                         |
| 15   | 50.2                               | 4.50 m                            | 14NH, 16a,<br>16b                     | 16, 18                     |
| 16   | 37.7                               | a 2.38 m<br>b 2.47 m              | 15, 16b<br>15, 16a                    | 15, 17<br>15, 17           |
| 17   | 171.8                              | -<br>a NH, 6.80 s<br>b NH, 7.37 s | 17bNH<br>17aNH                        | 16, 17<br>17               |
| 18   | 170.9                              | -<br>NH, 7.62 d (7.8)             | 19                                    | 15, 18, 19, 20, 21         |
| 19   | 44.7                               | 3.82 m                            | 18NH, 20,<br>21a, 21b                 | 18, 20, 21, 22             |
| 20   | 20.6                               | 1.03 d (6.6)                      | 19                                    | 19, 21, 22                 |
| 21   | 35.0                               | a 1.56 m<br><br>b 1.64 m          | 19, 21b, 22a,<br>22b<br>19, 21a, 22a, | 19, 20, 22<br>19, 20, 22   |

|    |       |                                    |                                                      |
|----|-------|------------------------------------|------------------------------------------------------|
| 22 | 24.3  | a 2.92 m<br>b 3.26 m               | 21a, 21b, 22b<br>21a, 21b, 22a                       |
| 23 | 153.3 | -                                  |                                                      |
| 24 | 108.9 | -                                  |                                                      |
| 25 | 167.3 | -                                  |                                                      |
|    |       | NH, 8.37 s                         | 23, 24, 25, 26, 29,<br>30                            |
| 26 | 40.1  | -                                  |                                                      |
| 27 | 15.2  | a 1.30 m<br>b 1.36 m               | 27b, 28a, 28b 26, 28, 29<br>27a, 28a, 28b 26, 28, 29 |
| 28 | 15.2  | a 1.30 m<br>b 1.36 m               | 27a, 27b, 28b 26, 27, 29<br>27a, 27b, 28a 26, 27, 29 |
| 29 | 159.3 | -                                  |                                                      |
| 30 | 102.8 | 6.03 s                             | 23, 24, 26, 29, 31                                   |
| 31 | 162.2 | -                                  |                                                      |
| 32 | 46.0  | a 4.56 d (18.0)<br>b 4.67 d (16.8) | 23, 31, 33<br>23, 31, 33                             |
| 33 | 169.7 | -                                  |                                                      |

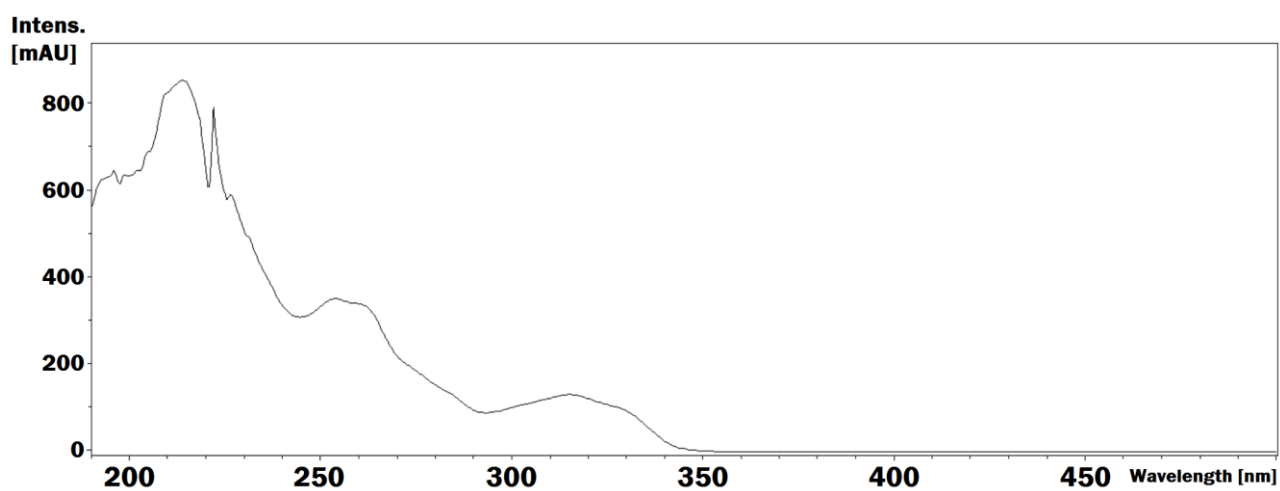

UV spectrum of **6**.



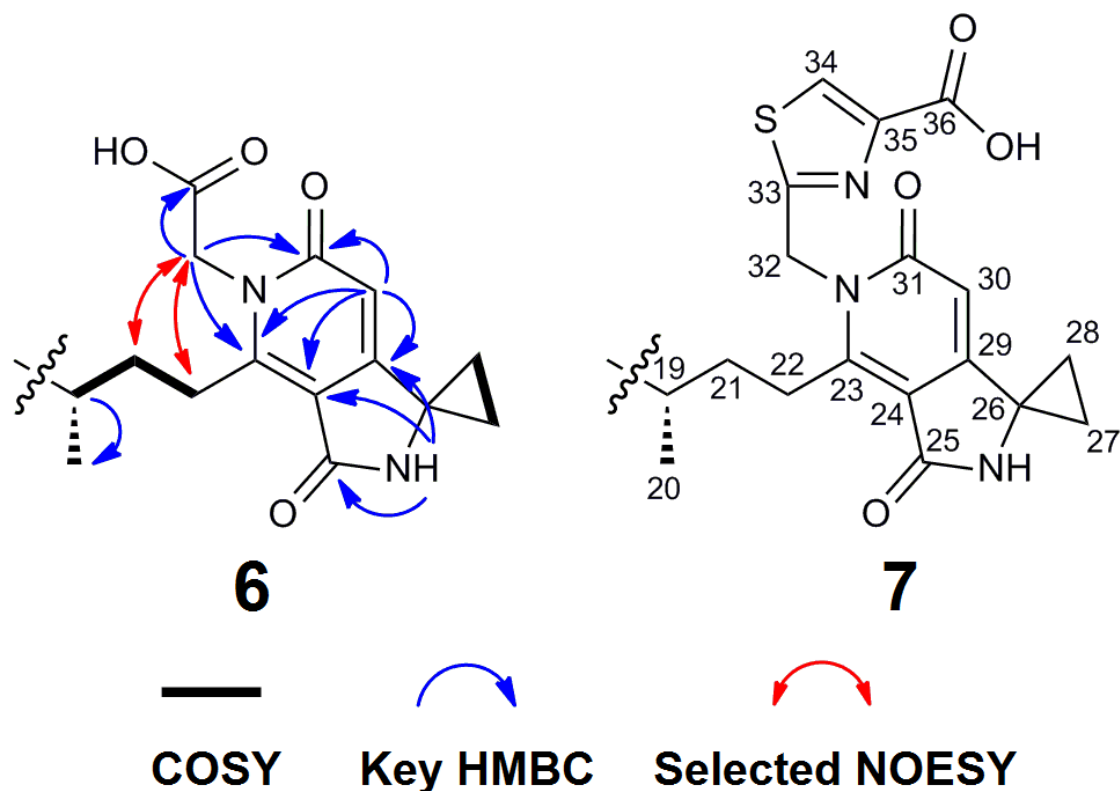

NMR-based key correlations for the structural assignment of **6** as compared to the structure of known **7** (precolibactin-712).

**Note for structure elucidation of 6:** Compound **6** was obtained as white and amorphous powder. The molecular formula was determined as  $C_{33}H_{51}N_5O_7$  based on the HRESIMS analysis ( $m/z$  630.3842  $[M + H]^+$ , calcd 630.3867). A comparison of the 1D and 2D NMR spectra of **6** and **7** indicated that **6** contains the same *N*-myristoyl-D-asparagine residue and 1*H*-pyrrolo[3,4-*c*]pyridine-3,6(2*H*,5*H*)-dione unit as in **7**. However, the thiazole proton resonance at  $\delta_H$  8.09 (H-34), and the carbon signals at  $\delta_C$  164.2 (C-33),  $\delta_C$  126.9 (C-34) and  $\delta_C$  151.7 (C-35) in **7** were not observed in **6**, suggesting an absence of the thiazole ring in **6**. Instead, C-32 ( $\delta_C$  46.0) in **6** was observed to connect the 1*H*-pyrrolo[3,4-*c*]pyridine-3,6(2*H*,5*H*)-dione unit and the terminal carboxyl group, as evidenced by the HMBC correlations from the methylene protons at  $\delta_H$  4.56 (H-32) to the carbon signals at C-23 ( $\delta_C$  153.3), C-31 ( $\delta_C$  162.2) and C-33 ( $\delta_C$  169.7). As an intermediate from the *clb* pathway, **6** can be envisioned to be released from the first NRPS module of ClbJ, which would fill the gap between previously isolated precolibactin-546 (**5**) and precolibactin-712 (**7**).

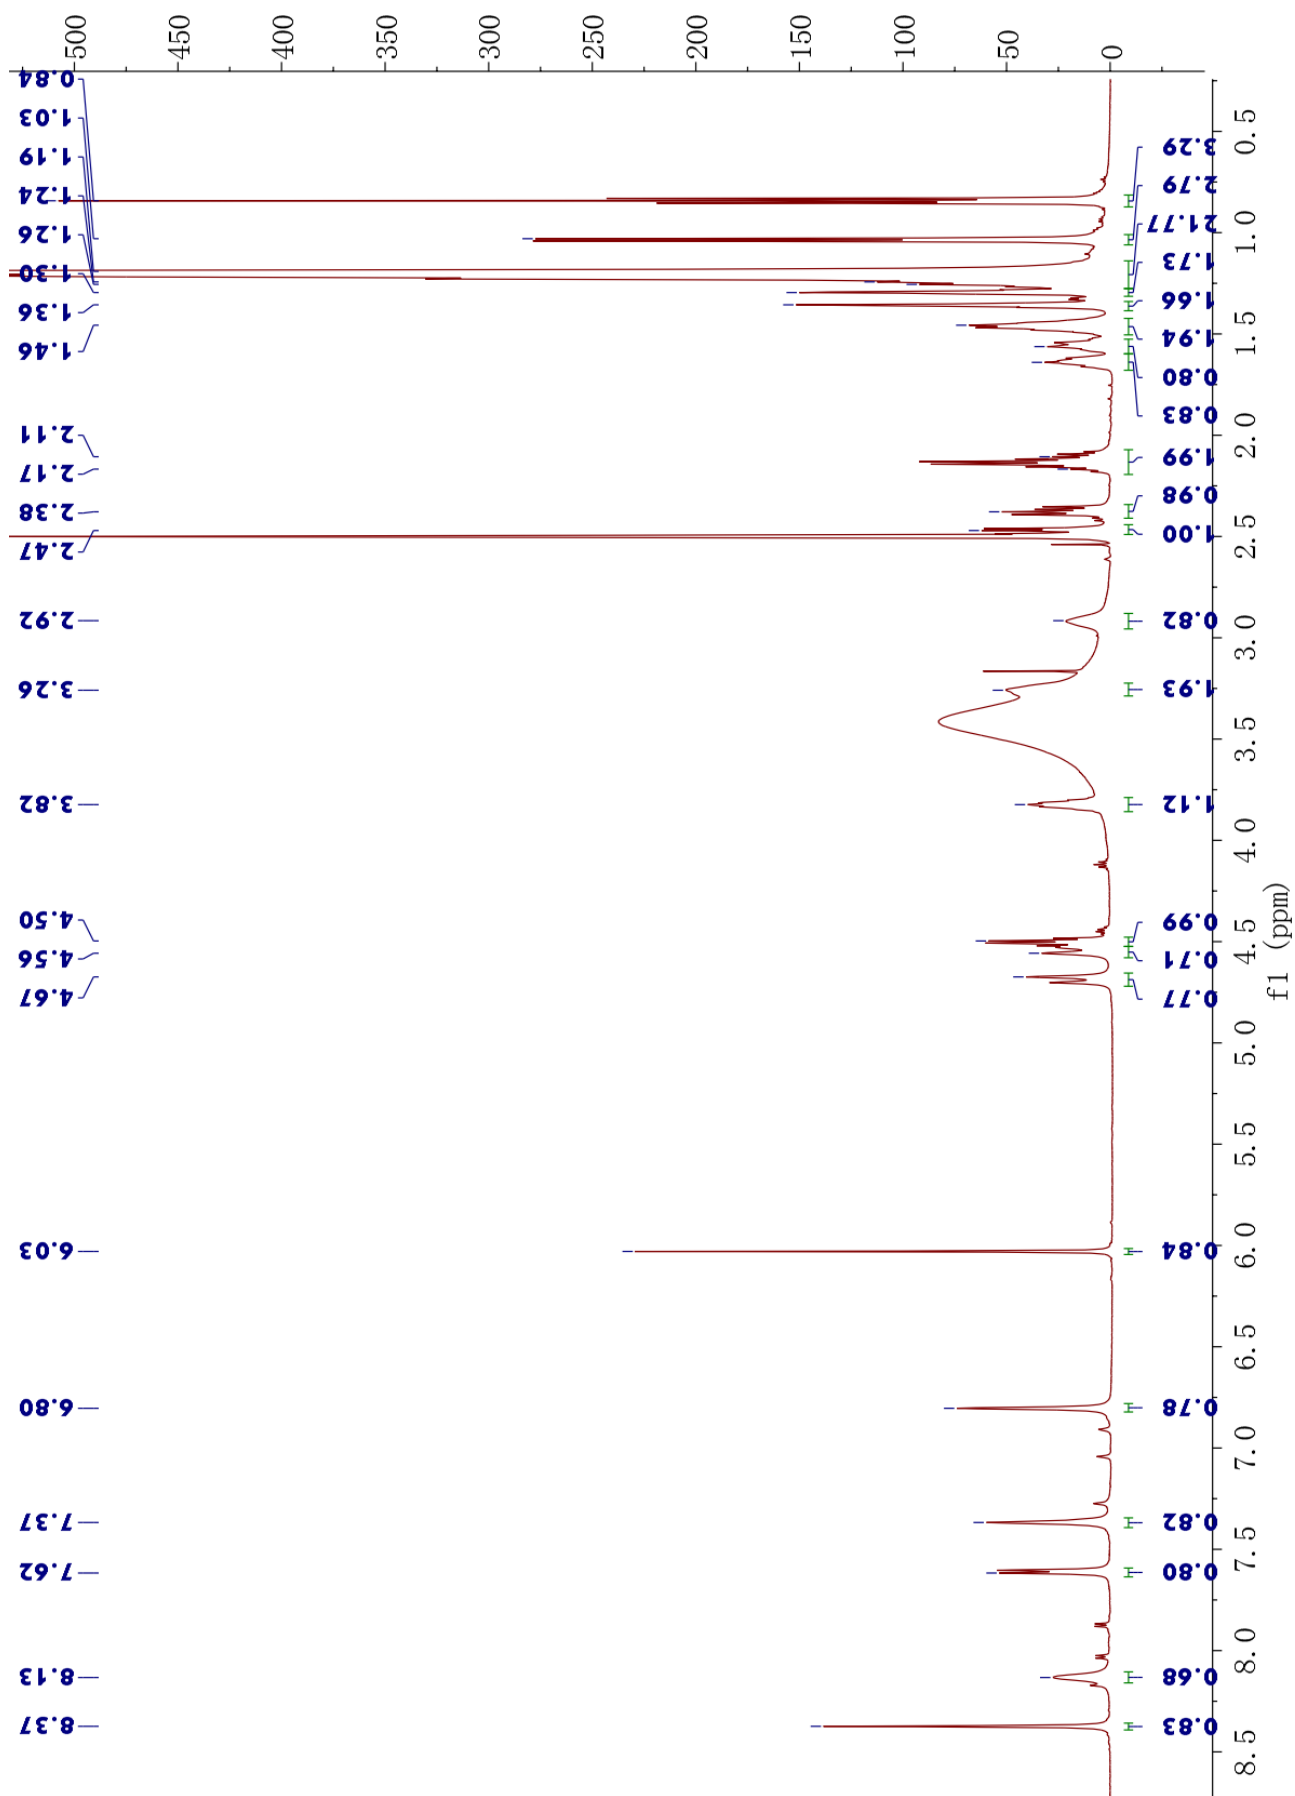

$^1\text{H}$  NMR spectrum of **9** (recorded in  $\text{DMSO-}d_6$  at 600 MHz).

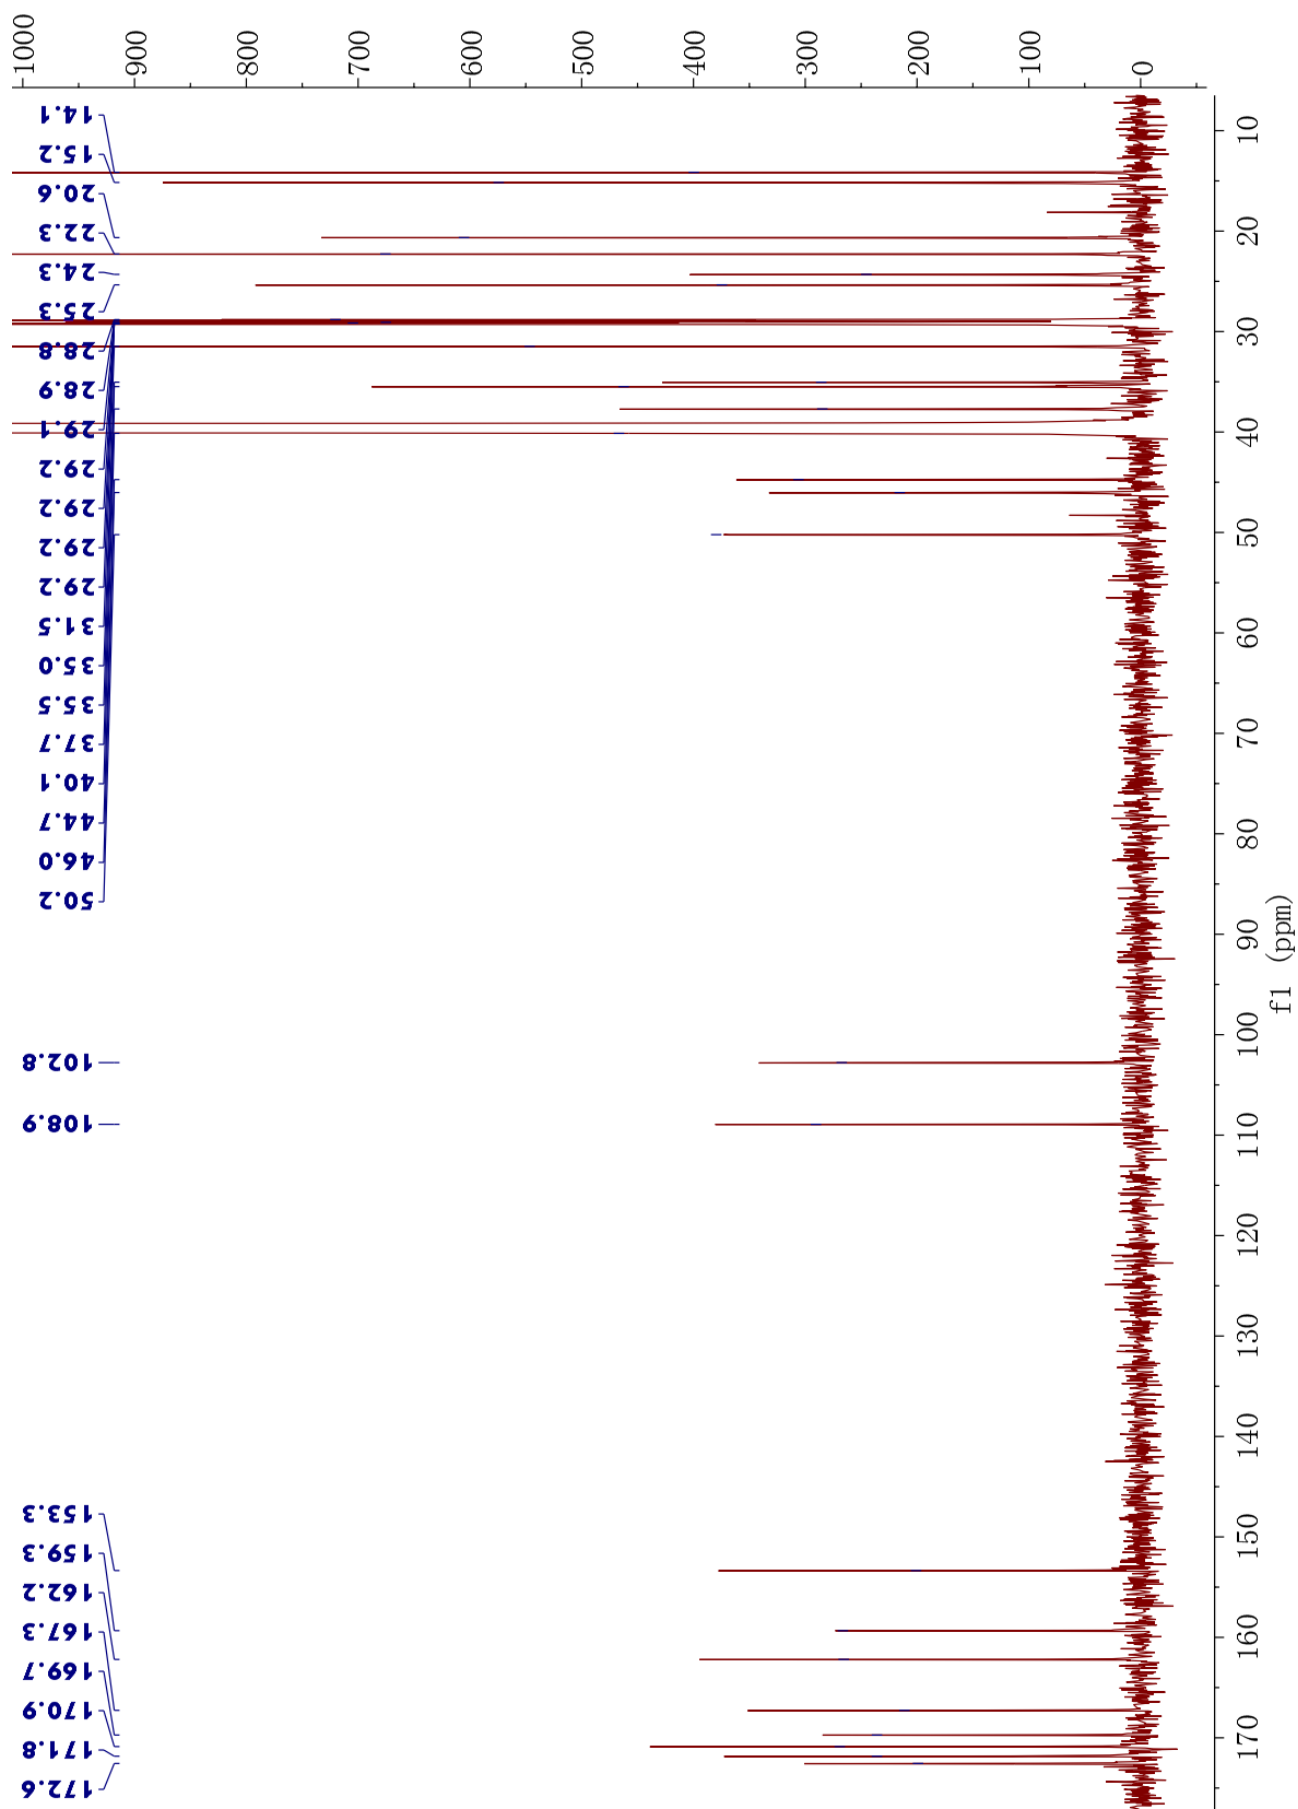

<sup>13</sup>C NMR spectrum of **9** (recorded in DMSO-*d*<sub>6</sub> at 150 MHz).

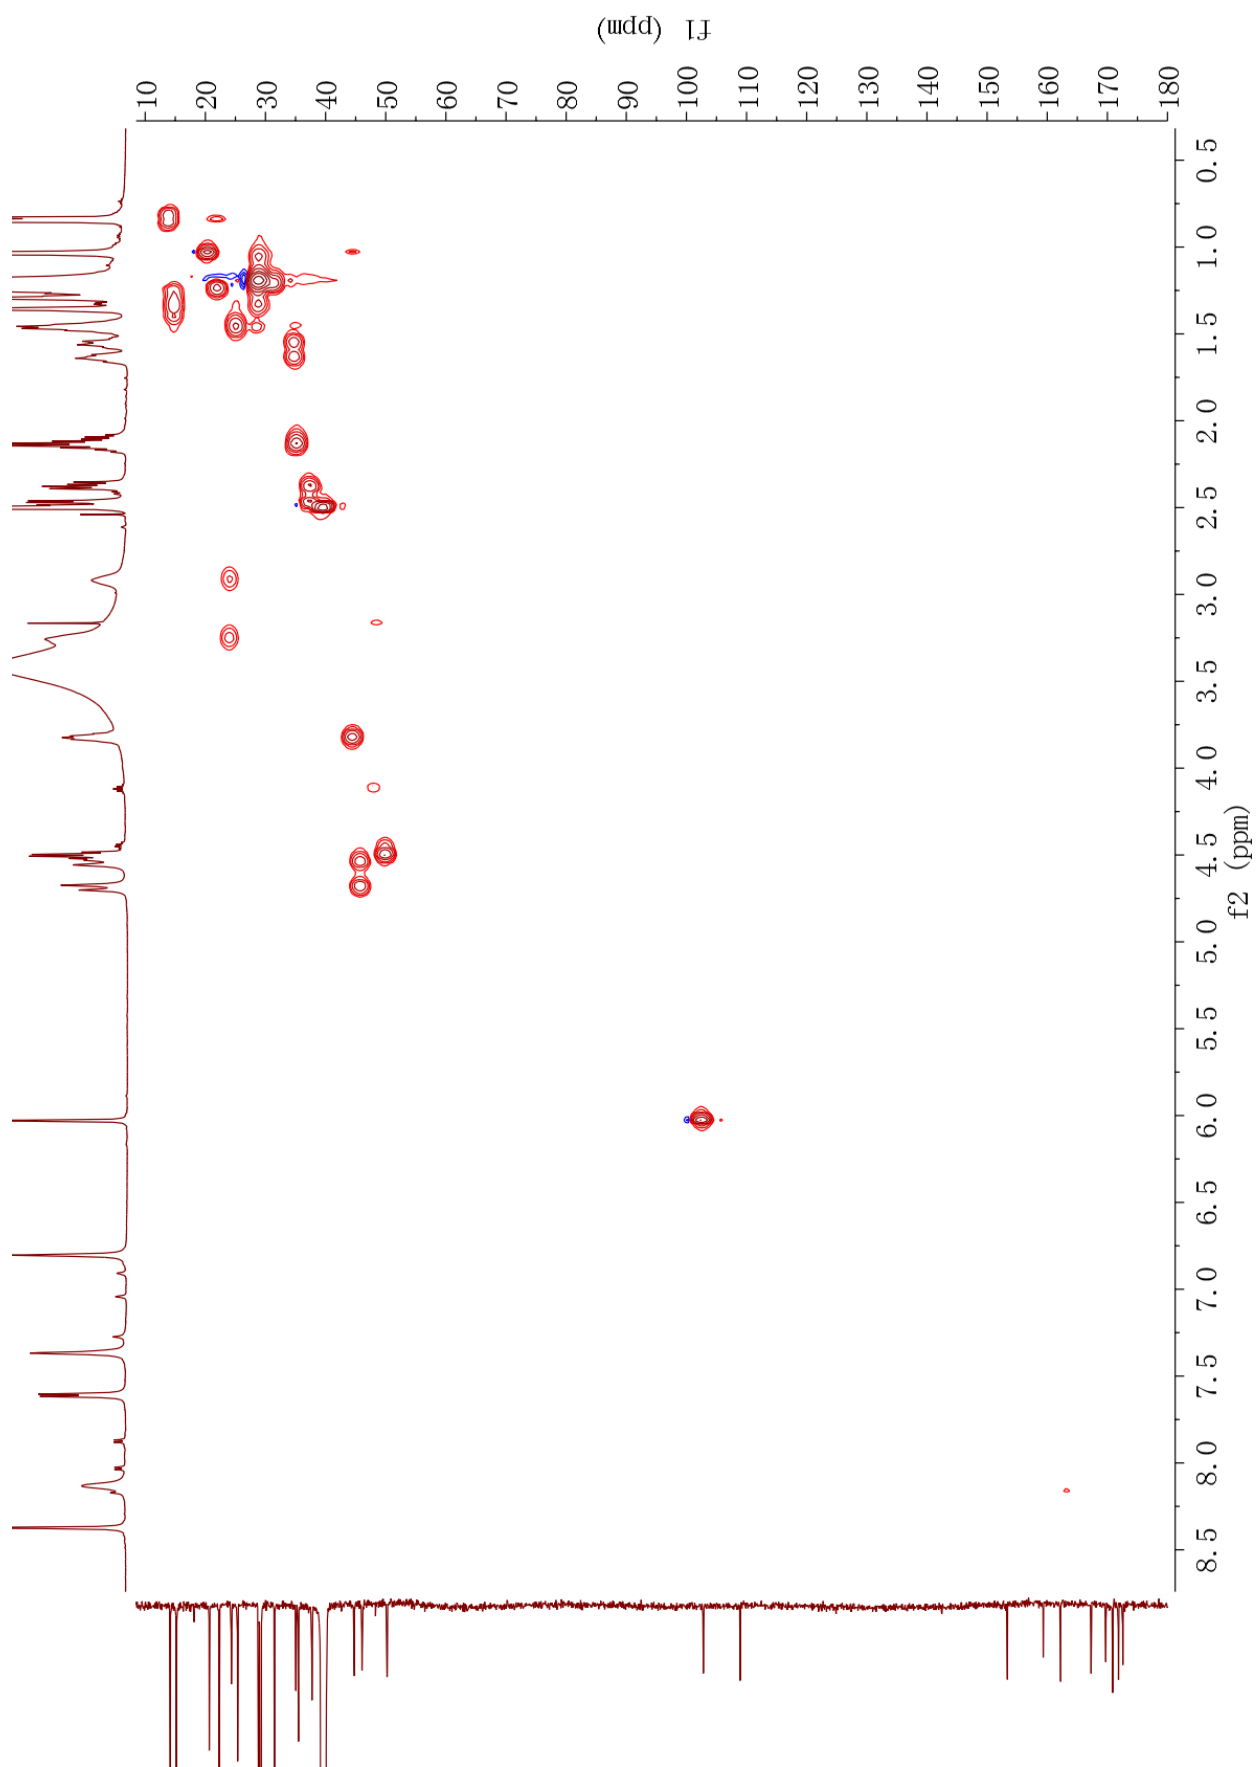

$^1\text{H}$ - $^{13}\text{C}$  HSQC spectrum of **6** (recorded in  $\text{DMSO}-d_6$  at 600 MHz).

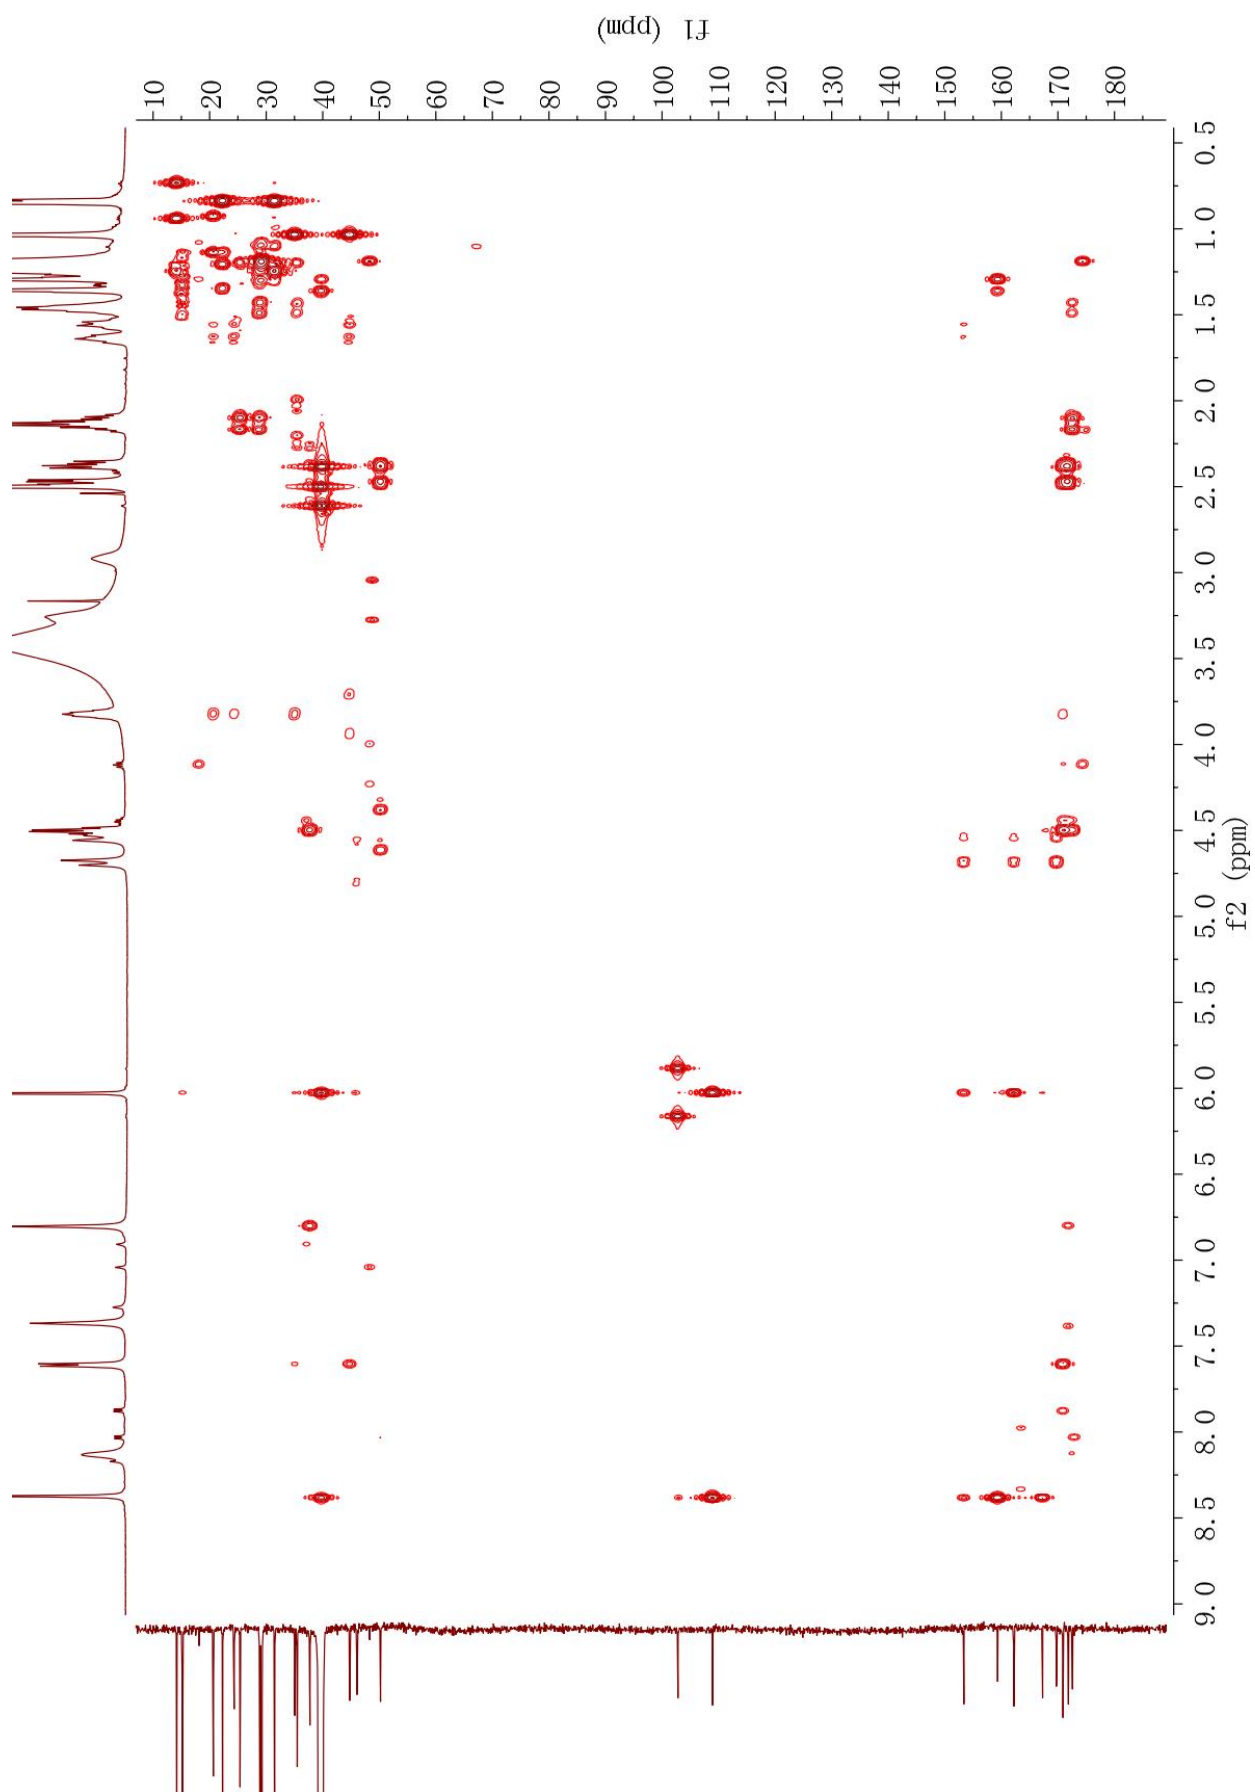

$^1\text{H}$ - $^{13}\text{C}$  HMBC spectrum of **6** (recorded in  $\text{DMSO}-d_6$  at 600 MHz).

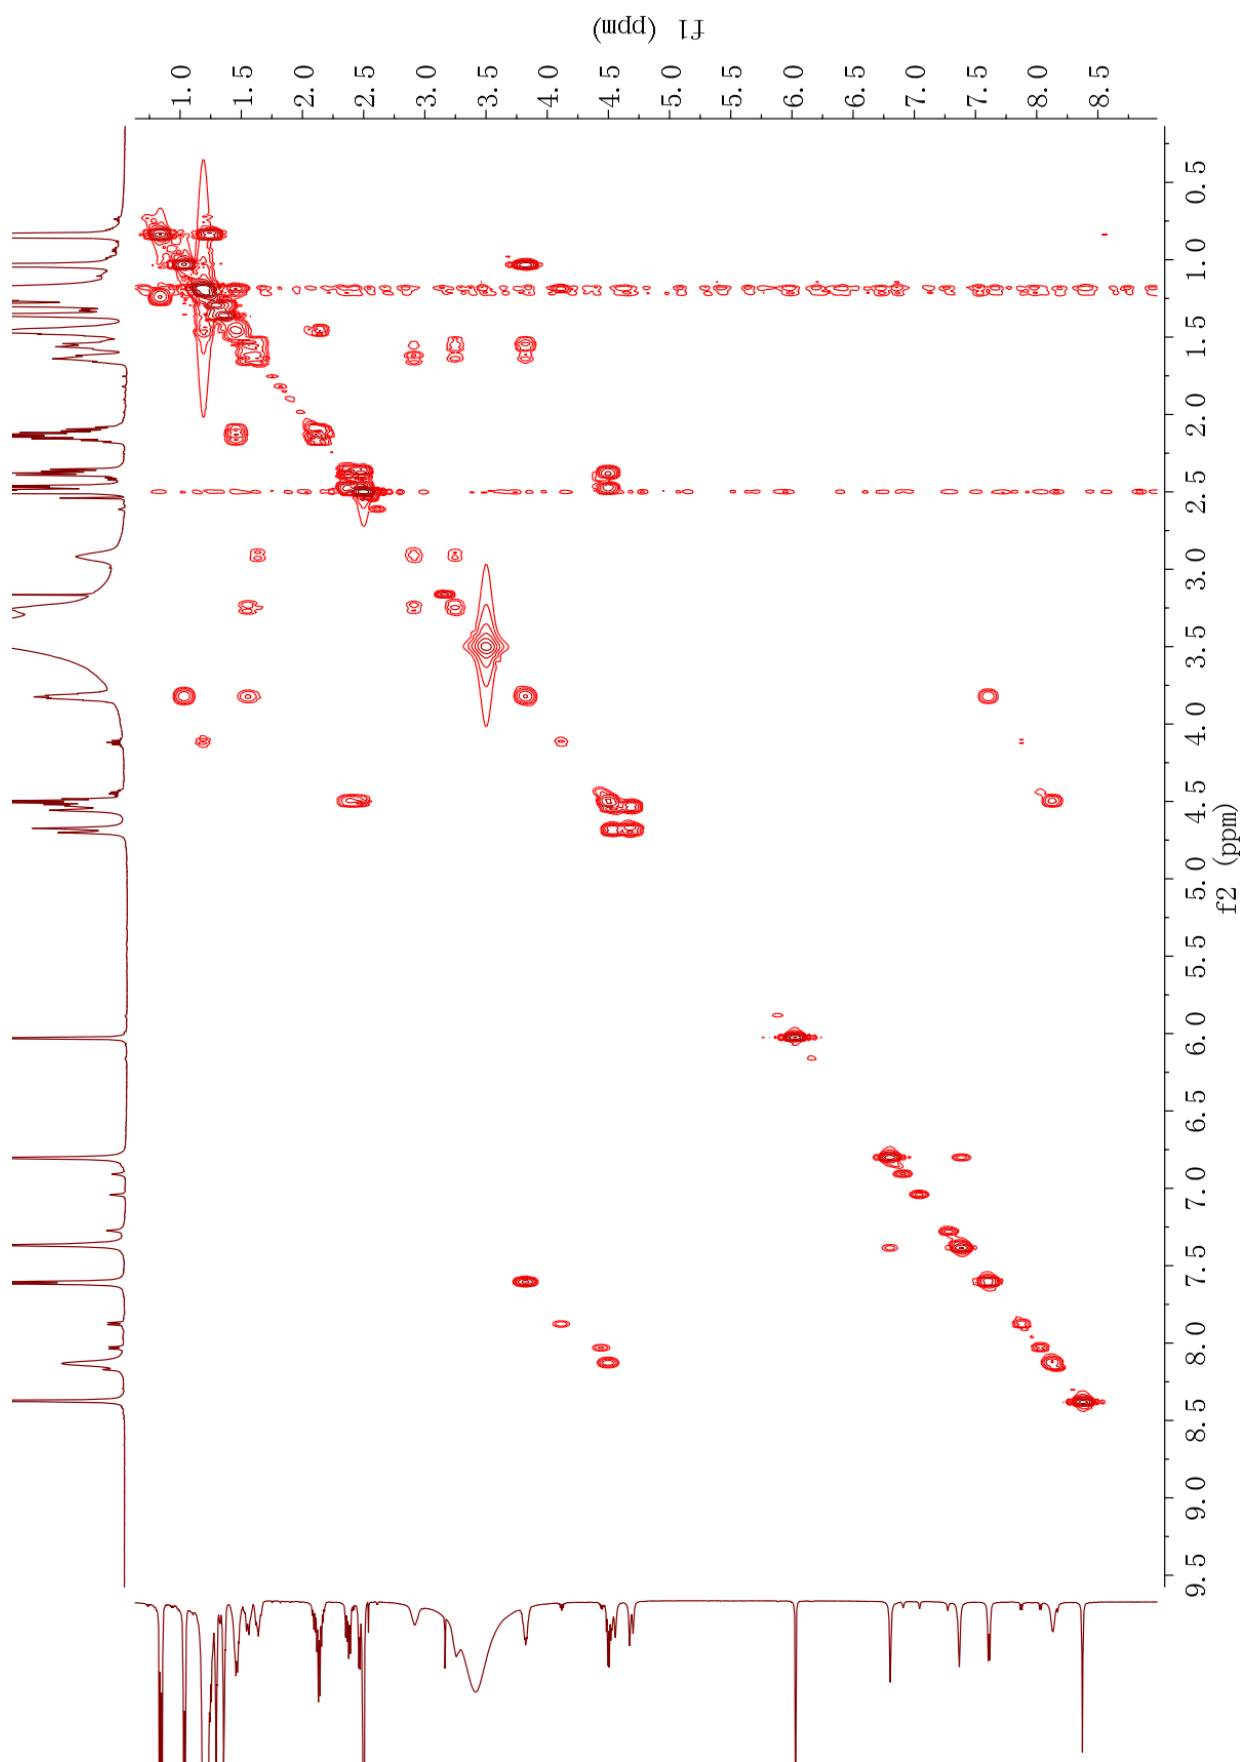

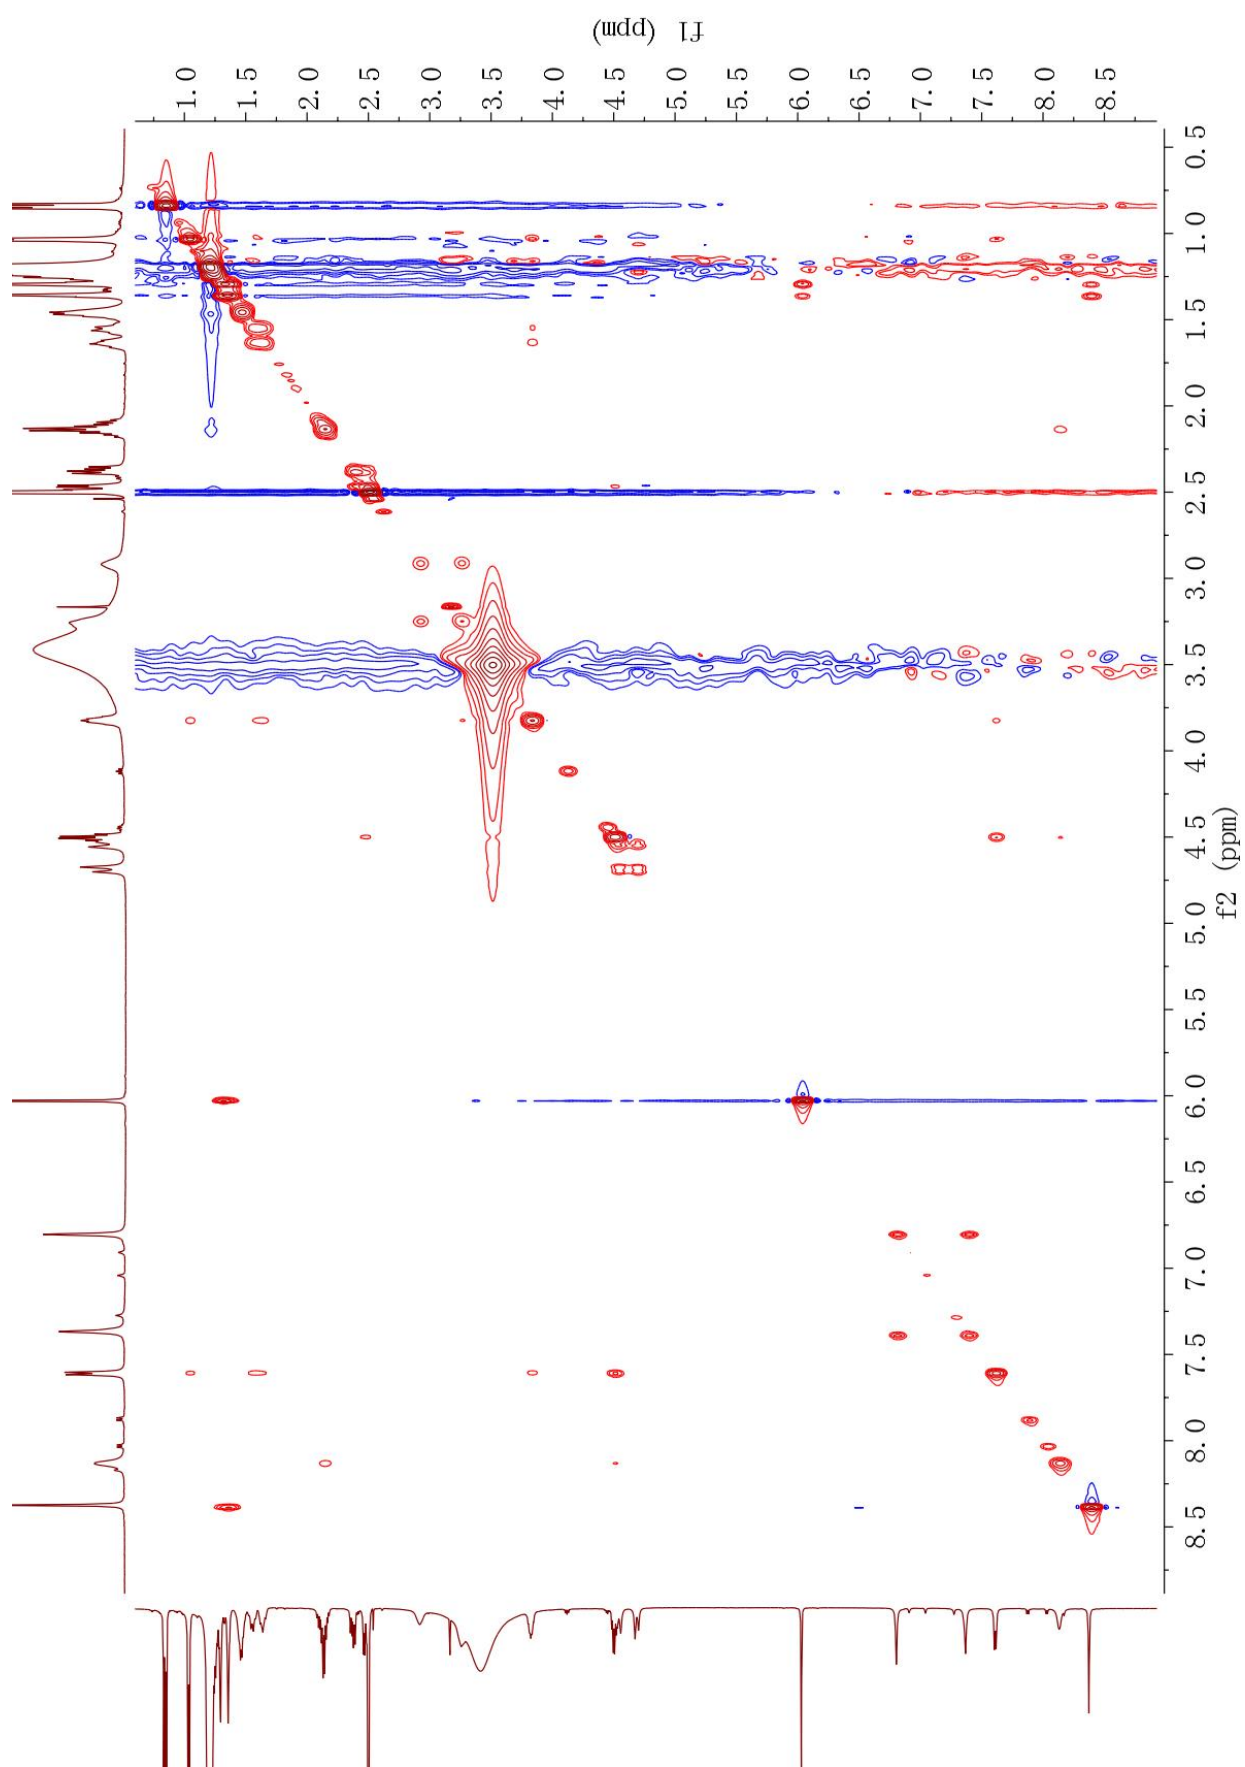

$^1\text{H}$ - $^1\text{H}$  NOESY spectrum of **6** (recorded in  $\text{DMSO}-d_6$  at 600 MHz).
